# Supplementary material
Source: PubMed Central journal article supplement (PMC2654095)
Supplement: ja803158y-File002.pdf [file ja803158y-File002.pdf]

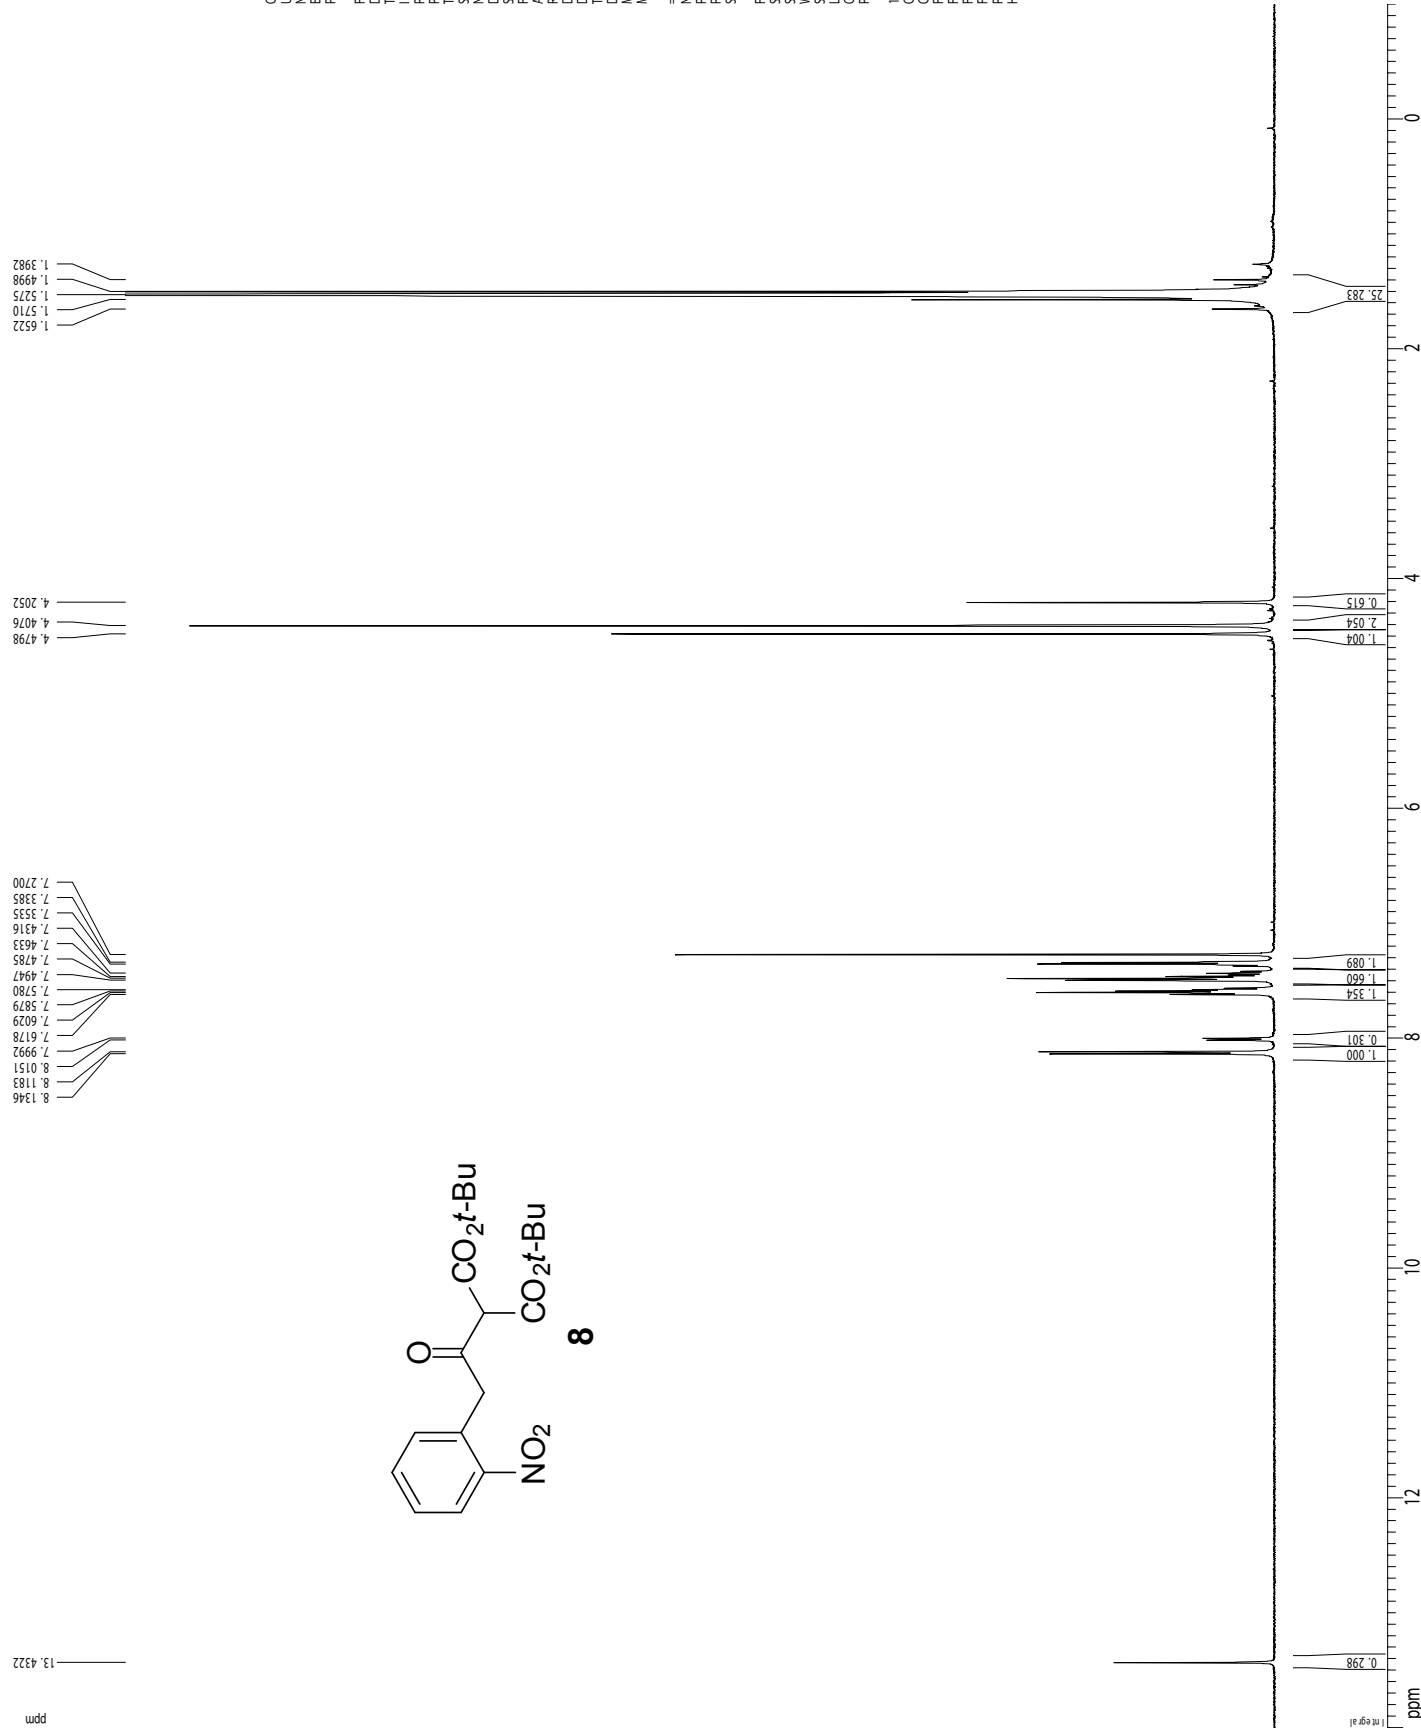

Current Data Parameters  
 USER: commor  
 NAME: CLM-1-20484  
 EXPNO: 3  
 PROCNO: 1

F2 - Acquisition Parameters  
 Date\_: 20080412  
 Time: 15:12  
 INSTRUM: cryos00  
 PROBRD: 5 mmCPCL-1H  
 PULPROG: zgpg30  
 TD: 8728  
 SOLVENT: CDCl3  
 NS: 8  
 DS: 2  
 SWH: 8012.820 Hz  
 FIDRES: 0.098043 Hz  
 AQ: 5.0988774 sec  
 RG: 8  
 DW: 62.400 usec  
 DE: 6.00 usec  
 TE: 298.0 K  
 D1: 0.1000000 sec  
 ACQRES: 0.0000000 sec  
 ICORR: 0.01500000 sec

===== CHANNEL f1 =====  
 NUC1: 1H  
 P1: 7.38 usec  
 PL1: 1.60 dB  
 SFO1: 500.2235015 MHz

F2 - Processing parameters  
 SI: 65536  
 SF: 500.2200257 MHz  
 WDW: no  
 SSB: 0.00 Hz  
 GB: 0.00 Hz  
 PC: 4.00

ID NAME pl ot parameter  
 CX: 22.80 cm  
 CY: 112.92 cm  
 F1P: 14.000 ppm  
 F1: 7003.08 Hz  
 F2P: -1.000 ppm  
 F2: -500.22 Hz  
 PPHCMM: 0.65789 ppm/cm  
 HZCMM: 329.09213 Hz/cm

<sup>13</sup>C spectrum with <sup>1</sup>H decoupling

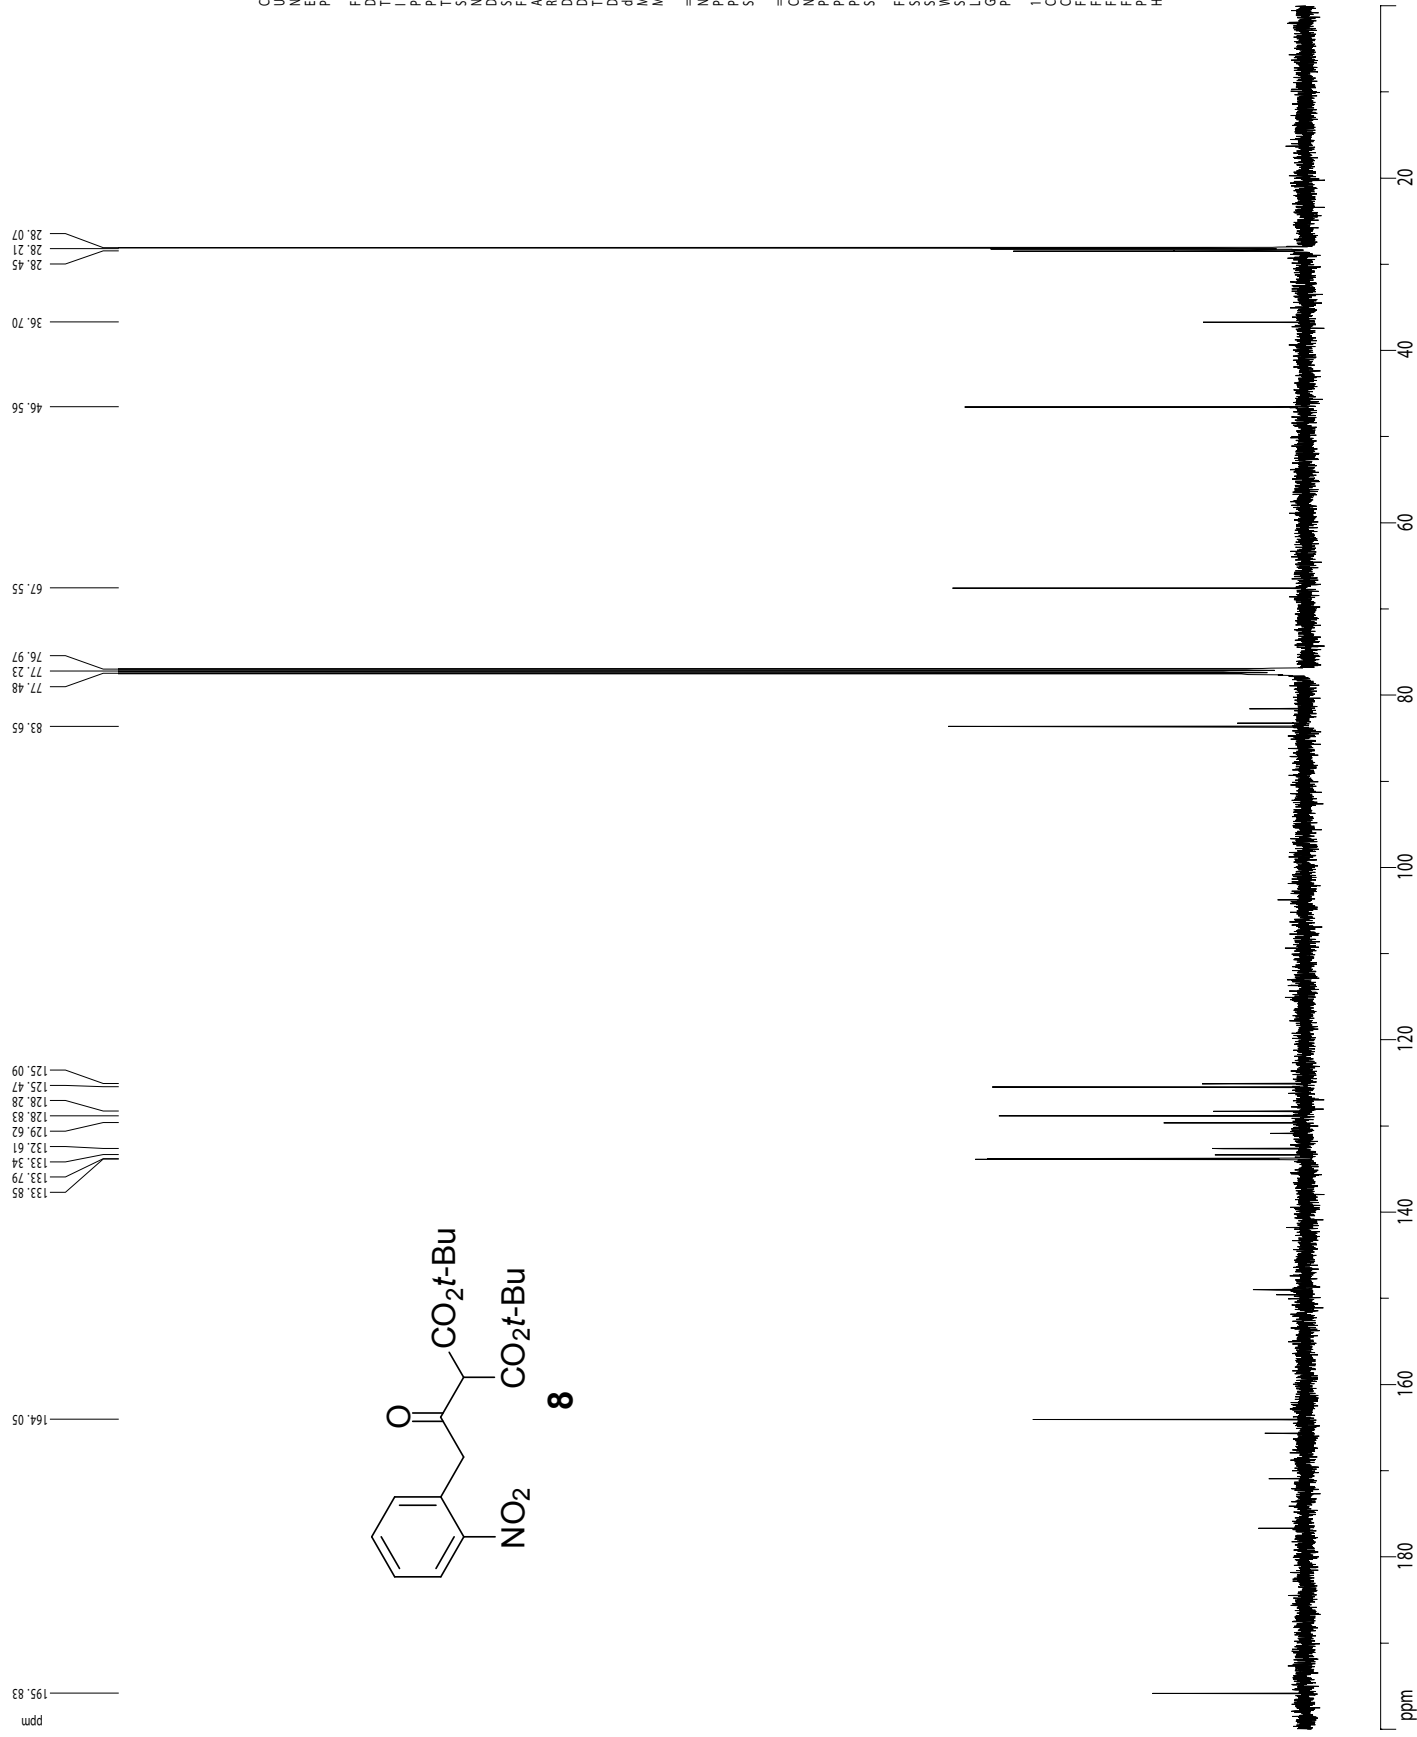

```

Current Data Parameters
USER      conor
NAME      CLM-1-20484
EXPNO     5
PROCNO    1

F2 - Acquisition Parameters
Date_     20080412
Time      15.13
INSTRUM   cryo500
PROBHD    5 mmCPTCL 1H
PULPROG   zgpg30
TD         65418
SOLVENT   CDCl3
NS         265
DS         4
SWH        30903.031 Hz
FIDRES     0.463222 Hz
AQ          1.0754470 sec
RG          9195.2
DW          16.500 usec
DE          6.00 usec
TE          298.0 K
d11         0.2500000 sec
d12         0.0300000 sec
d13         0.0000000 sec
d14         0.0150000 sec
ACQPRG     MVRK
===== CHANNEL f1 =====
NUC1        13C
P1          14.75 usec
PL1         -1.00 dB
SFO1        125.7942546 MHz
===== CHANNEL f2 =====
COPROG2    waltz16
NUC2        1H
PCPD2       100.00 usec
PL2         1.60 dB
PL12        24.80 dB
SFO2        500.2225011 MHz
F2 - Processing parameters
SI          65536
SF          125.7803992 MHz
EM          EM
LB          0
GB          0
PC          2.00

ID: NMR plot parameters
CV          22.80 cm
CY          44.83 cm
EI          200.000 ppm
F1          25156.08 Hz
F2          0.000 ppm
F3          0.00 Hz
PP4CM       8.77193 ppm/cm
HZCM        1103.33679 Hz/cm
    
```

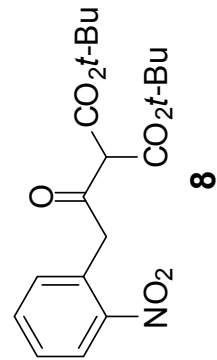

ghnqc

Current Data Parameters  
S19

USER comor  
NAME CLM1-20482  
EXPNO 12  
PROCNO 1

F2 - Acquisition Parameters

Date\_ 20071101  
Time 14:52  
INSTRUM av600  
PROBHD 5 mm TBI 1H/13  
PULPROG zgpg30  
TD 65536  
SOLVENT CDCl3  
NS 1  
DS 16  
SWH 7396.450 Hz  
FIDRES 8.329335 Hz  
AQ 0.0600788 sec  
RG 2050  
DW 67.600 usec  
DE 6.00 usec  
TE 298.1 K  
CAST2 145.0000000  
d0 0.00000300 sec  
d1 1.10000002 sec  
d2 0.00344828 sec  
d3 0.00002000 sec  
d4 0.00000400 sec  
d5 0.00000000 sec  
DELTA1 0.0022428 sec  
DELTA2 0.00001380 sec  
IN0

==== CHANNEL f1 =====  
NUC1 1H  
P1 8.00 usec  
p2 16.00 usec  
PL1 -1.00 dB  
SFO1 600.1345610 MHz

==== CHANNEL f2 =====  
CPDPRG2 gbrp  
NUC2 13C  
P3 15.00 usec  
PCPD2 70.00 usec  
PL2 -1.00 dB  
PL3 12.50 dB  
SFO2 150.9194685 MHz

==== GRAB F2 CHANNEL =====  
GPMAM SINE 100  
GPMAR SINE 100  
GPMAB SINE 100  
GZ1 50.00 %  
GZ2 30.00 %  
GZ3 40.10 %  
PT6 1000.00 usec

F1 - Acquisition parameters  
NU0 2  
TD 256  
SFO1 150.9194 MHz  
FIDRES 141.330792 Hz  
SW 240.072 ppm  
FHM0DE Q

F2 - Processing parameters  
SI 1024  
SF 600.1300257 MHz  
WDW EM  
SSB 0  
LB 5.00 Hz  
GB 0  
PC 1.00

F1 - Processing parameters  
SI 1024  
MCZ Q  
SF 150.9027892 MHz  
WDW COSINE  
SSB 3  
LB 0.00 Hz  
GB 0

2D NMR plot parameters  
CZ2 18.00 cm  
CZ1 15.00 cm  
F2PLO 8.279 ppm  
F2LO 4968.65 Hz  
F2PHI 1.407 ppm  
F2H 844.26 Hz  
F1PLO 136.392 ppm  
F1LO 20581.94 Hz  
F1PHI 23.845 ppm  
F1H 3598.24 Hz  
F2PPMCM 0.38181 ppm/cm  
F2HZCM 229.13265 Hz/cm  
F1PPMCM 7.50315 ppm/cm  
F1HZCM 1132.24654 Hz/cm

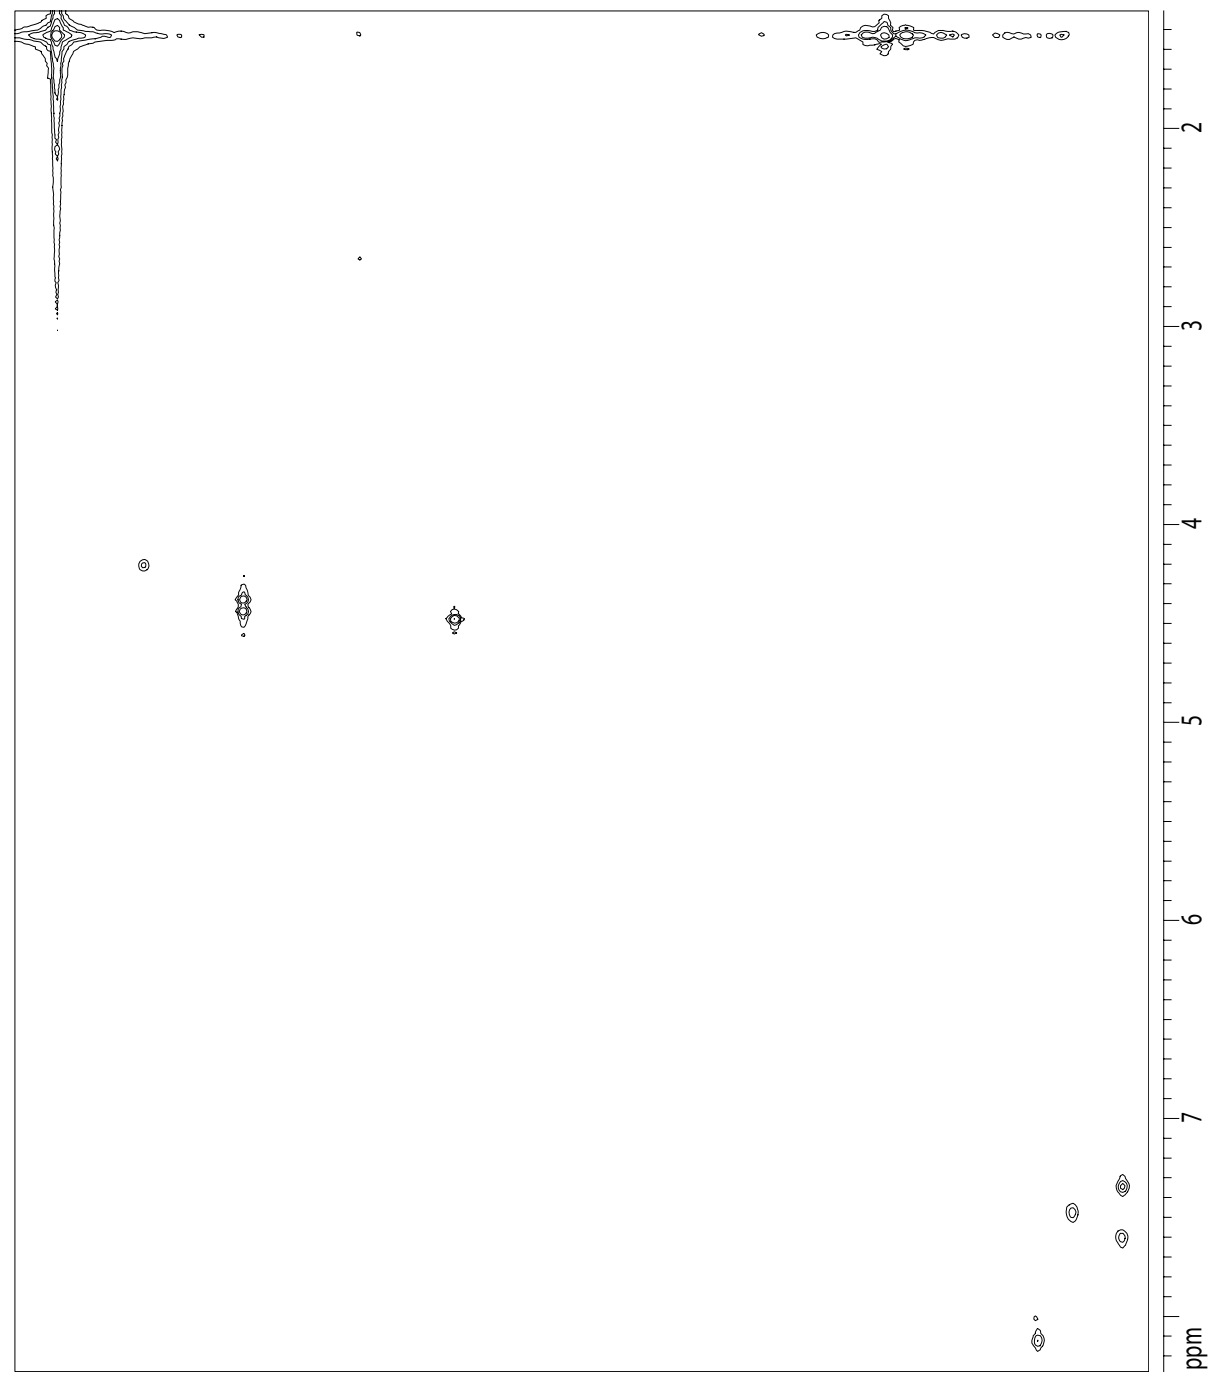

1H spectrum

S20

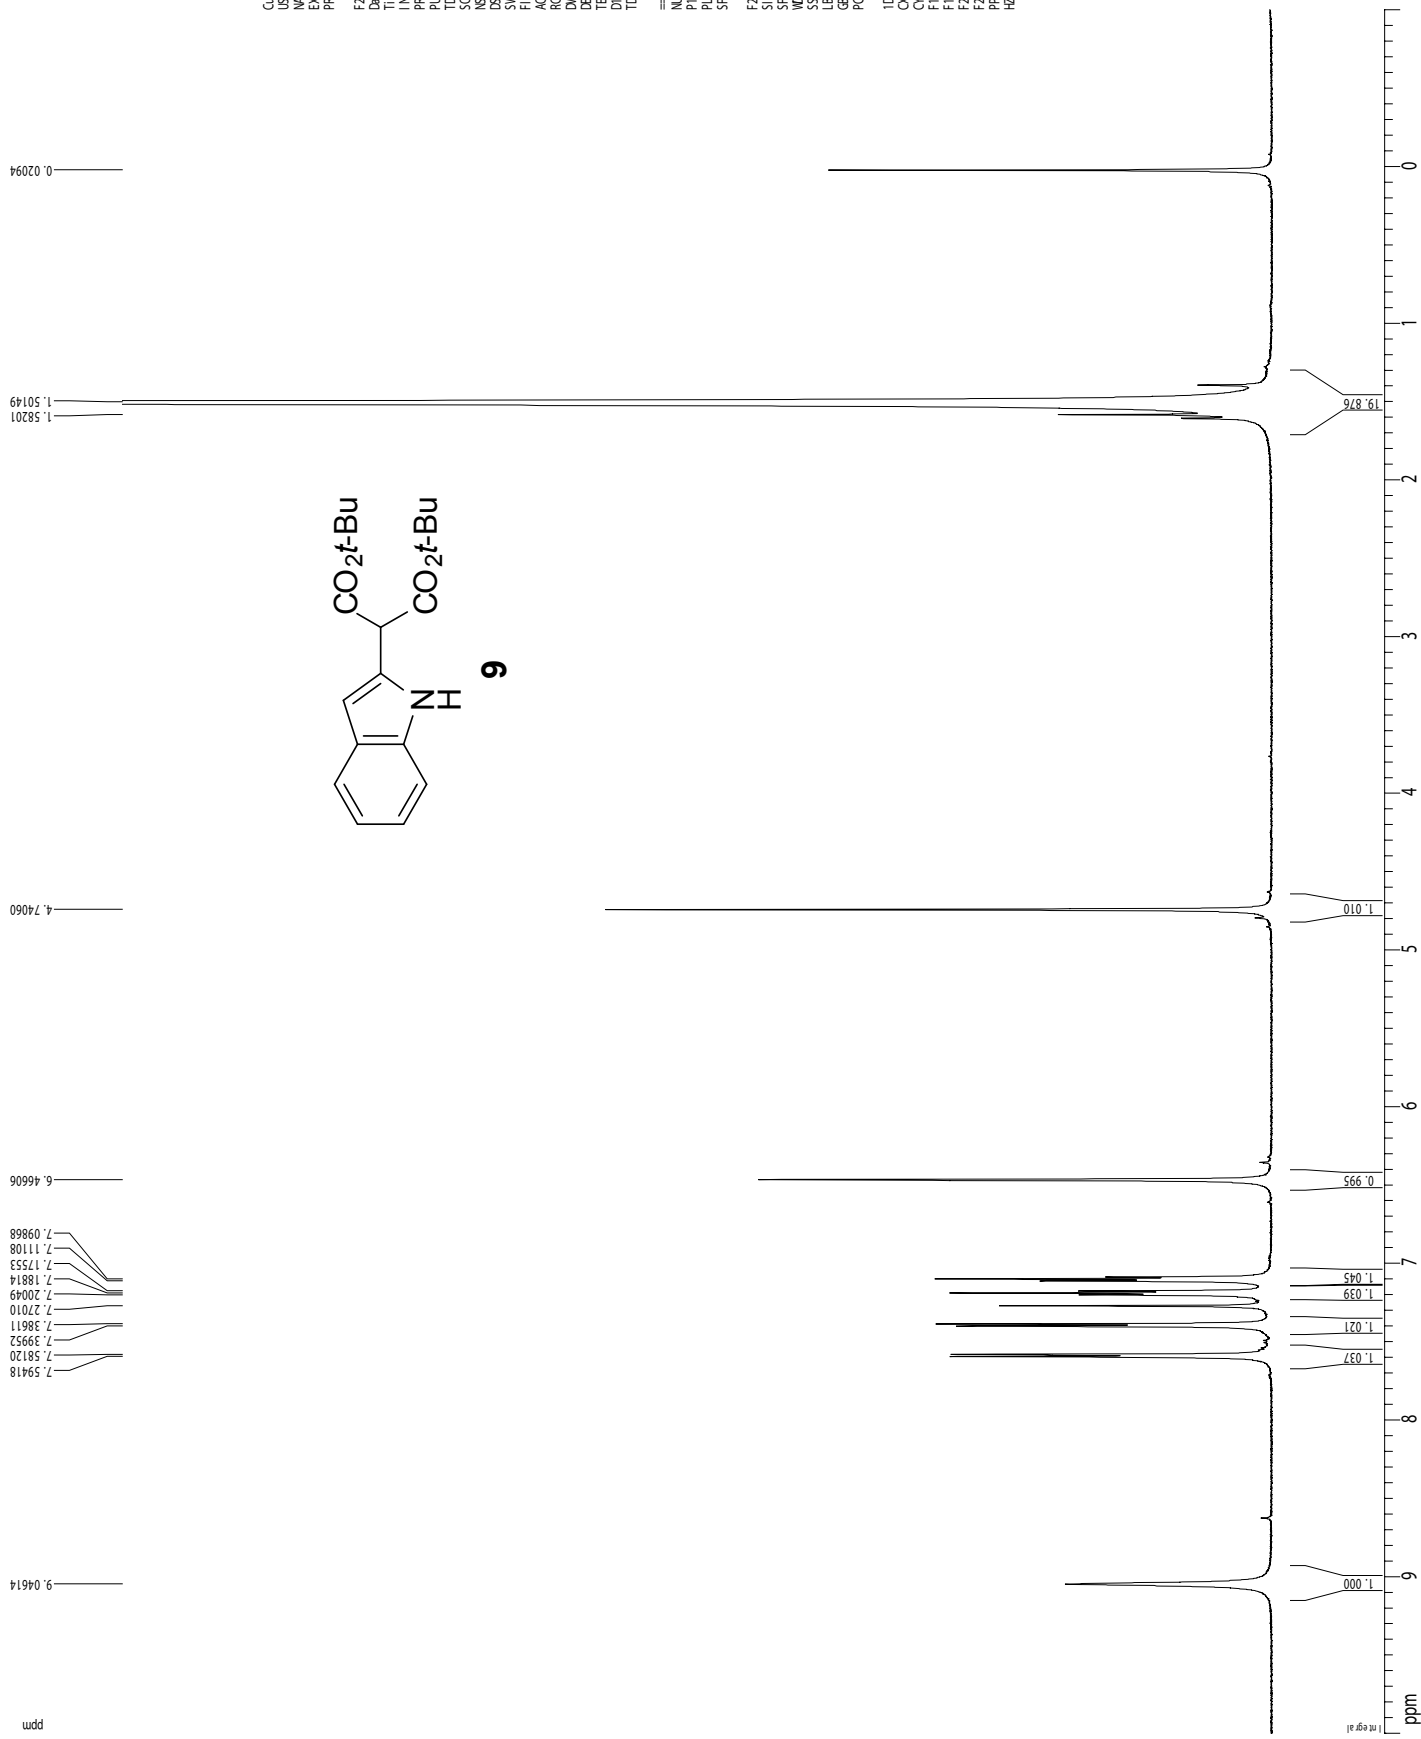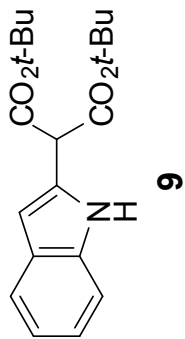

Current Data Parameters  
 USER Connor  
 NAME CLM1-206C2  
 EXPNO 11  
 PRCCNO 1

F2 - Acquisition Parameters  
 Date\_ 20071105  
 Time 14.53  
 INSTRUM av600  
 PROBHD 5 mmTBI H1/3  
 PULPROG zg30  
 TD 97938  
 SOLVENT CDCl3  
 NS 9  
 DS 2  
 SWH 9615.385 Hz  
 FIDRES 0.098178 Hz  
 AQ 5.0928259 sec  
 RG 80.6  
 DW 52.000 usec  
 DE 6.00 usec  
 TE 298.0 K  
 D1 0.10000000 sec  
 TDO 1

===== CHANNEL f1 =====  
 NUC1 1H  
 P1 8.00 usec  
 PL1 -1.00 dB  
 SFO1 600.1342009 MHz

F2 - Processing parameters  
 SI 65536  
 SF 600.1300280 MHz  
 WDW hanning  
 SSB 0  
 LB 0.00 Hz  
 GB 0  
 PC 1.00

1D NMR plot parameters  
 CX 22.80 cm  
 CY 143.04 cm  
 FIP 10.000 ppm  
 F1 6001.30 Hz  
 F2P -1.000 ppm  
 F2 -600.13 Hz  
 PPKCM 0.48246 ppm/cm  
 HZCM 289.53641 Hz/cm

<sup>13</sup>C spectrum with <sup>1</sup>H decoupling

S21

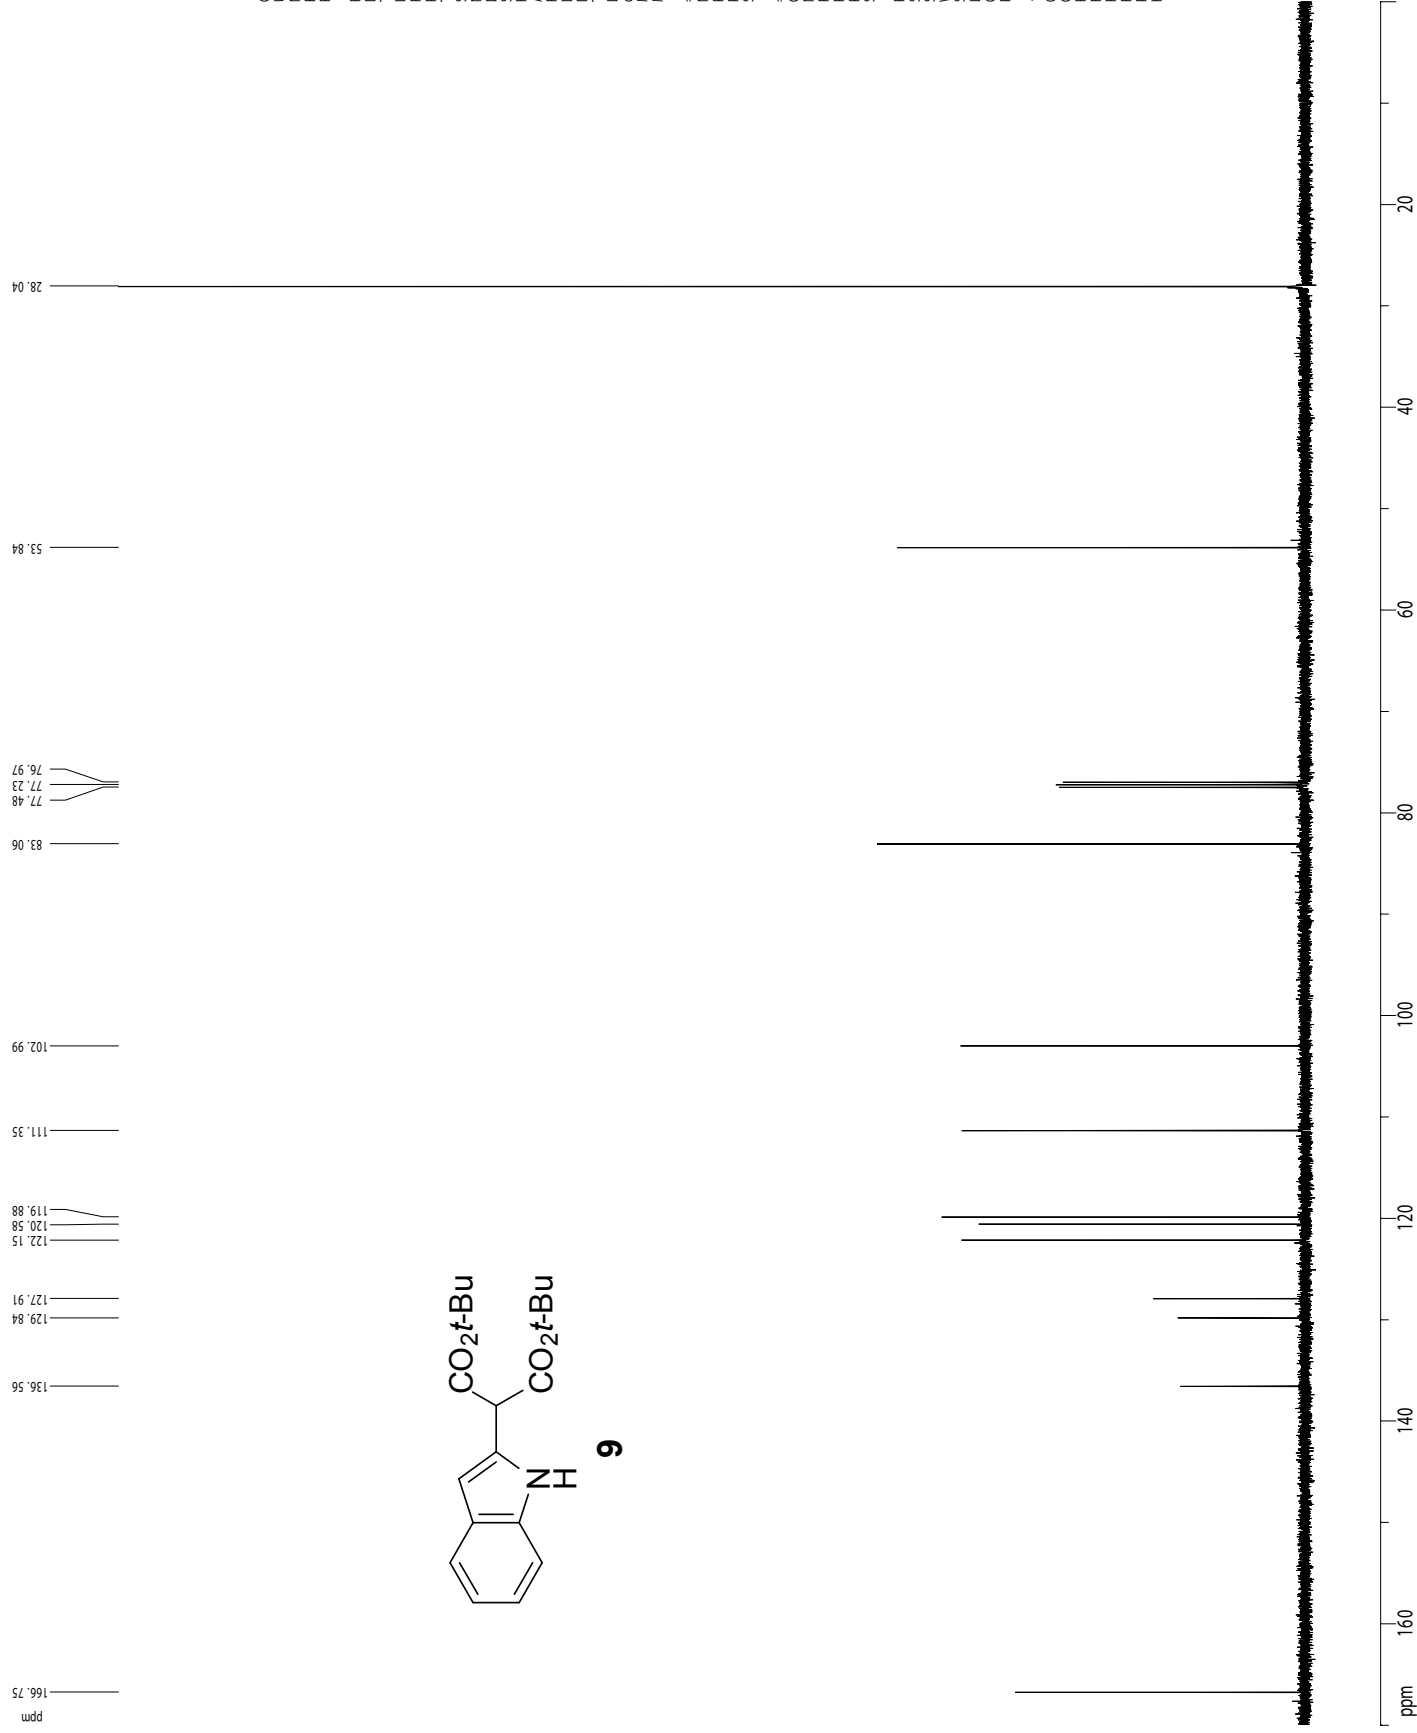

```

Current Data Parameters
USER      connor
NAME      CLM1-206C
EXPNO    3
PROCNO    1

F2 - Acquisition Parameters
Date_     20070905
Time      9.54
INSTRUM   cryo500
PROBHD    5 mmCPTCL 1H
PULPROG   zgpg30
TD         65418
SOLVENT    CDCl3
NS         29
DS         4
SWH        30903.031 Hz
FIDRES     0.463232 Hz
AQ         1.07544470 sec
RG         9195.2
DW         16.500 usec
DE         6.00 usec
TE         298.0 K
d1         0.25000000 sec
d11        0.03000000 sec
d12        0.00000000 sec
d13        0.01500000 sec
ACQREST    0.01500000 sec

===== CHANNEL f1 =====
NUC1       13C
P1         15.00 usec
PL1        -1.00 dB
SFO1       125.7942546 MHz

===== CHANNEL f2 =====
CPCPRG2    waltz16
NUC2       1H
PCPD2      100.00 usec
PL2        1.60 dB
PL12       23.54 dB
SFO2       500.2225011 MHz

F2 - Processing parameters
SI         65536
SF         125.7864066 MHz
WDW        no
SSB        0
LB         0.00 Hz
GB         0
PC         2.00

ID: NMR plot parameters
CV         27.80 cm
CY         27.37 cm
EIIP       170.000 ppm
F1P        21382.67 Hz
F2P        0.000 ppm
F2         0.00 Hz
PP4CM      7.45614 ppm/cm
HZCM       937.83636 Hz/cm
    
```

USER comor  
 NAME CLM1-206C2  
 EXPNO 12  
 PROCNO 1

F2 - Acquisition Parameters

Date\_ 20071105  
 Time 14:57  
 INSTRUM av600  
 PULPROG zgpg30  
 TO SOLVENT CDCl3  
 NS 2  
 DS 16  
 SWH 4921.260 Hz  
 FIDRES 5.541955 Hz  
 AQ 0.0902708 sec  
 RG 2050  
 DW 101.600 usec  
 DE 6.00 usec  
 TE 298.0 K  
 CNST2 145.0000000  
 d0 0.00000300 sec  
 D1 1.10000002 sec  
 d2 0.0034628 sec  
 d12 0.00002000 sec  
 d13 0.00000400 sec  
 DELTA1 0.00000000 sec  
 DELTA2 0.00000000 sec  
 INO 0.00001380 sec

CHANNEL f1

NUC1 1H  
 P1 8.00 usec  
 p2 16.00 usec  
 PL1 -1.00 dB  
 SFO1 600.1331507 MHz

CHANNEL f2

CPDPRG2 gbrp  
 NUC2 13C  
 P3 15.00 usec  
 PCPD2 70.00 usec  
 PL2 -1.00 dB  
 PL12 12.30 dB  
 SFO2 150.9194085 MHz

GRAB F1 CHANNEL

GNAM1 SINE 100  
 GPHAS1 SINE 100  
 GPHAS2 SINE 100  
 GZ1 50.00 %  
 GZ2 30.00 %  
 GZ3 40.10 %  
 PT6 1000.00 usec

F1 - Acquisition parameters

NUC1 13C  
 TD 256  
 SFO1 150.9194 MHz  
 FIDRES 141.330792 Hz  
 SW 240.072 ppm  
 FWHM 0

F2 - Processing parameters

SI 1024  
 SF 600.1300406 MHz  
 WDW EM  
 SSB 0  
 LB 5.00 Hz  
 GB 0  
 PC 1.00

F1 - Processing parameters

SI 1024  
 MCZ 0  
 SF 150.9027966 MHz  
 WDW COSYNE  
 SSB 3  
 LB 0.00 Hz  
 GB 0

2D NMR plot parameters

CU2 18.00 cm  
 CV1 15.00 cm  
 F2P10 7.713 ppm  
 F2L0 4628.73 Hz  
 F2PH1 1.266 ppm  
 F2H1 759.97 Hz  
 F1P10 126.964 ppm  
 F1L0 19159.25 Hz  
 F1PH1 21.686 ppm  
 F1H1 3272.42 Hz

F2PPMCM 0.58814 ppm/cm  
 F2HZCM 214.93134 Hz/cm  
 F1PPMCM 7.01857 ppm/cm  
 F1HZCM 1095.12219 Hz/cm

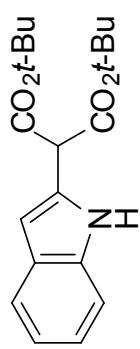

ghnqc

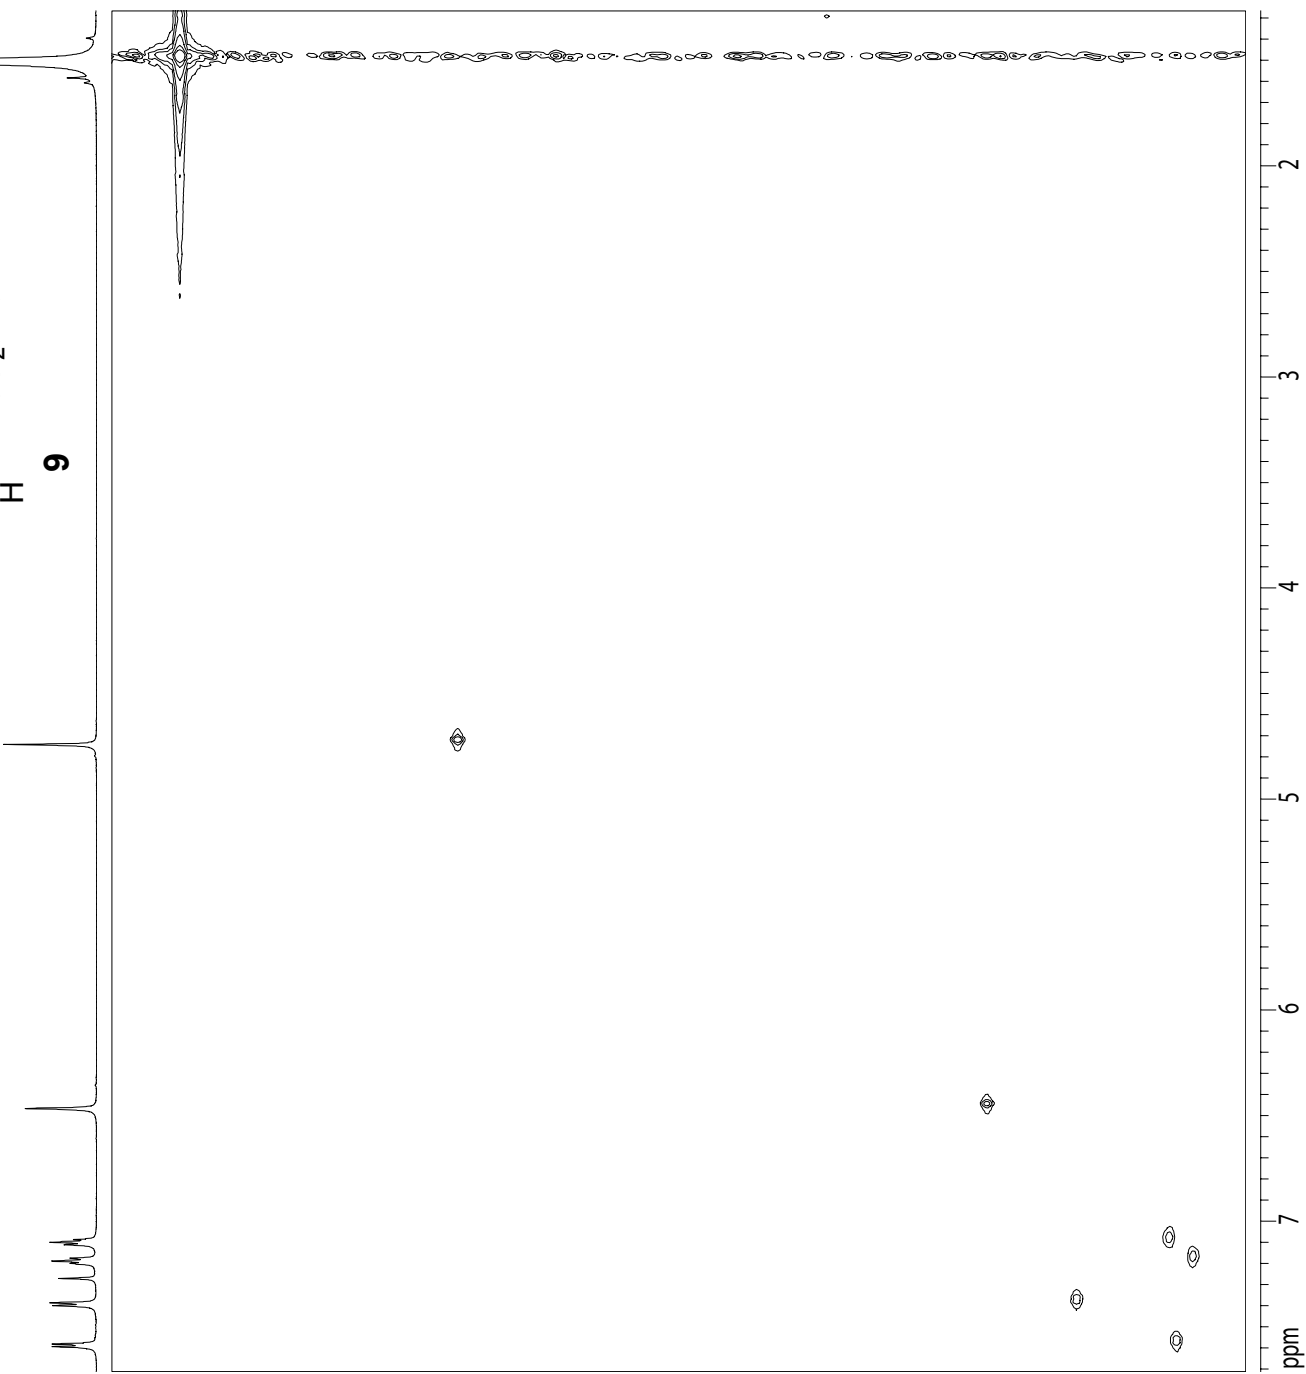

ppm

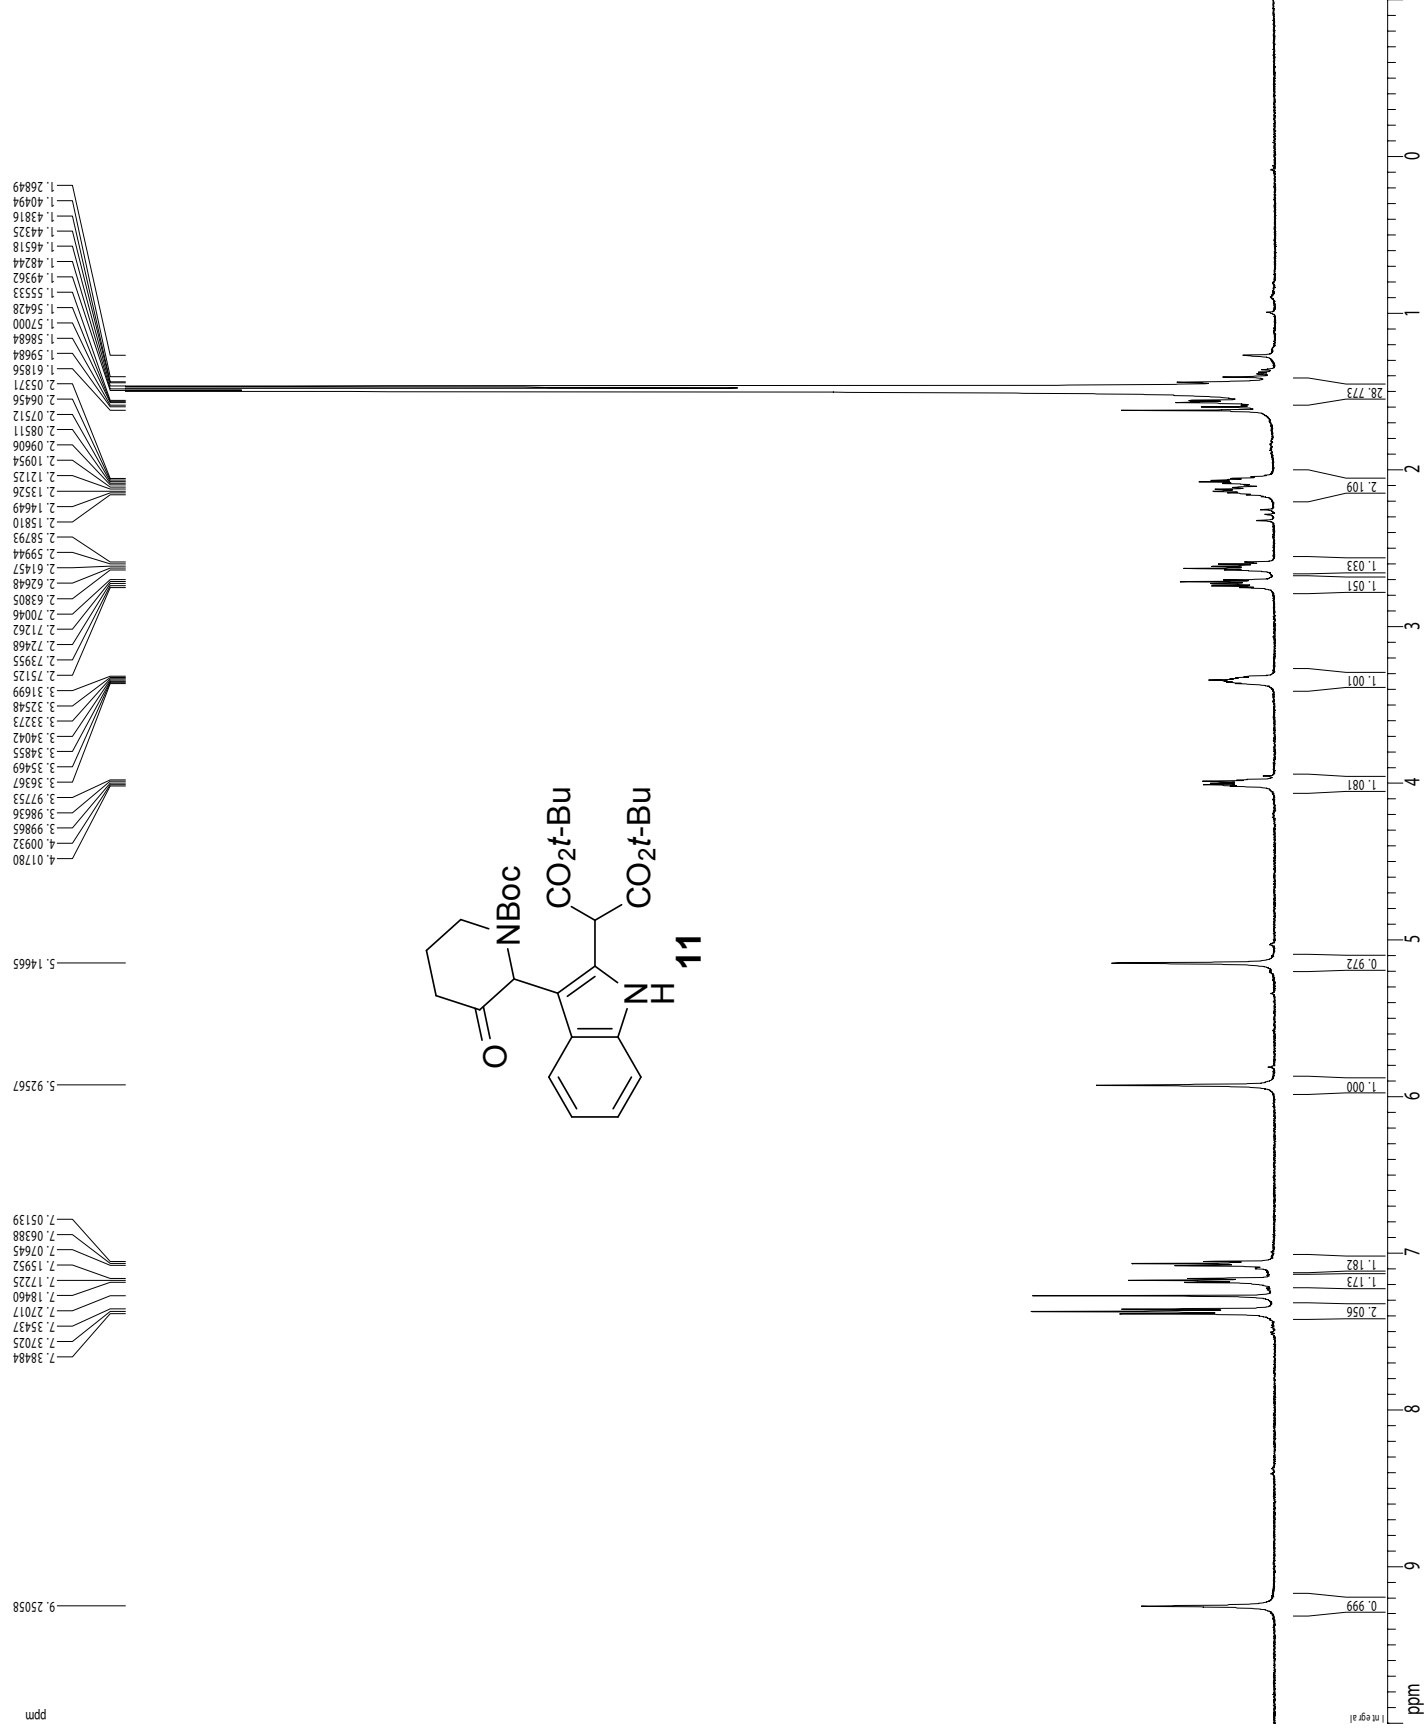

Current Data Parameters  
 USER conor  
 NAME CLM-1-21682  
 EXPNO 11  
 PROCNO 1

F2 - Acquisition Parameters  
 Date\_ 20071030  
 Time 18.15  
 INSTRUM av600  
 PROBHD 5 mmTBI 1H/13  
 PULPROG zg30  
 ID 97938  
 SOLVENT CDCl3  
 NS 24  
 DS 4  
 SWH 9615.385 Hz  
 FIDRES 0.098178 Hz  
 AQ 5.0928259 sec  
 RG 512  
 DW 52.000 usec  
 DE 6.00 usec  
 TE 298.0 K  
 TD 0.1000000 sec  
 TDO 1

===== CHANNEL f1 =====  
 NUC1 1H  
 P1 8.00 usec  
 PL1 -1.00 dB  
 SFO1 600.1342009 MHz

F2 - Processing parameters  
 SI 65536  
 SF 600.1300280 MHz  
 WDW tu  
 SSB 0  
 LB 0.00 Hz  
 GB 0  
 PC 1.00

1D NMR plot parameters  
 CX 22.80 cm  
 CY 43.16 cm  
 FIP 10.000 ppm  
 F1 6001.30 Hz  
 F2P -600.13 Hz  
 PPKCM 0.48246 ppm/cm  
 HZCM 289.53641 Hz/cm

<sup>13</sup>C spectrum with <sup>1</sup>H decoupling

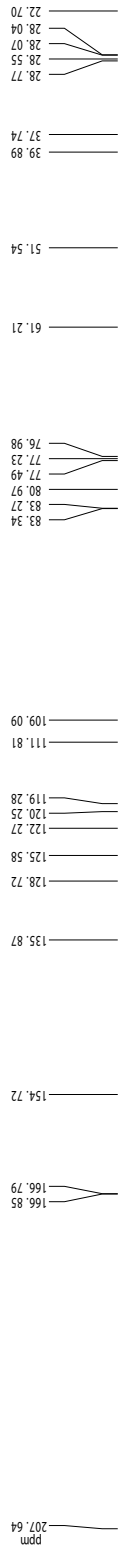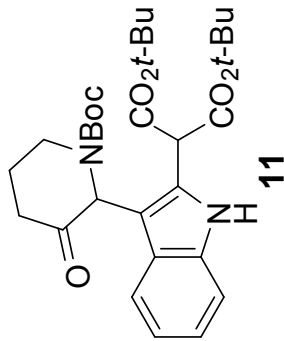

```

Current Data Parameters
USER      conor
NAME      CLM1-2168
EXPNO     3
PROCNO    1

F2 - Acquisition Parameters
Date_     20070907
Time      21.15
INSTRUM   cryo500
PROBHD    5 mmCPTCL 1H
PULPROG   zgpg30
TD         65418
SOLVENT   CDCl3
NS         259
DS         4
SWH        30903.031 Hz
FIDRES     0.463222 Hz
AQ         1.07544470 sec
RG         9195.2
DW         16.500 usec
DE         6.00 usec
TE         298.0 K
d1         0.25000000 sec
d11        0.03000000 sec
d12        0.00000000 sec
d13        0.01500000 sec
ACQBRK    0.01500000 sec

===== CHANNEL f1 =====
NUC1       13C
P1         15.00 usec
PL1        -1.00 dB
SFO1       125.7942548 MHz

===== CHANNEL f2 =====
CPCPRG2    waltz16
NUC2        1H
PCPD2      100.00 usec
PL2         1.60 dB
PL12       23.54 dB
SFO2        500.2225011 MHz

F2 - Processing parameters
SI         65536
SF         125.7864020 MHz
WDW        no
LB         0.00 Hz
GB         0
PC         2.00

ID.NMR plot parameters
CV         272.80 cm
CY         15.00 cm
ETP        210.000 ppm
F1P        26413.88 Hz
F2P        0.000 ppm
F2         0.00 Hz
PP4CM      9.21053 ppm/cm
HZCM       1158.50366 Hz/cm
    
```

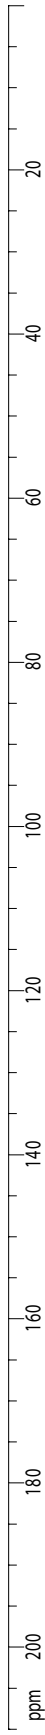



USER comor  
 NAME CLM1-21682  
 EXPNO 12  
 PROCNO 1

F2 - Acquisition Parameters

Date\_ 20071030  
 Time 18.22  
 INSTRUM av600  
 PROBHD 5 mm TBI 1H/13  
 PULPROG zgpg30  
 TD 65536  
 SOLVENT CDCl3  
 NS 2  
 DS 16  
 SWH 5165.289 Hz  
 FIDRES 5.816767 Hz  
 AQ 0.0860084 sec  
 RG 1150  
 DW 96.800 usec  
 DE 6.00 usec  
 TE 298.0 K  
 CHST2 145.0000000  
 d0 0.00000300 sec  
 d1 1.10000002 sec  
 d2 0.00344828 sec  
 d12 0.00002000 sec  
 d13 0.00000400 sec  
 DELTA1 0.00322428 sec  
 DELTA2 0.00000000 sec  
 INO 0.00001380 sec

==== CHANNEL f1 =====  
 NU1 1H  
 P1 8.00 usec  
 PL1 -1.00 dB  
 SFO1 600.1332407 MHz

==== CHANNEL f2 =====  
 CPDPRG2 gbrp  
 NU2 13C  
 P3 15.00 usec  
 PL2 -1.00 dB  
 PL12 12.38 dB  
 SFO2 150.9194085 MHz

==== GRAB F1 CHANNEL =====  
 GRAB1 SINE 100  
 GRAB2 SINE 100  
 GRAB3 SINE 100  
 GRAB4 SINE 100  
 GRAB5 SINE 100  
 GRAB6 SINE 100  
 GRAB7 SINE 100  
 GRAB8 SINE 100  
 GRAB9 SINE 100  
 GRAB10 SINE 100  
 GRAB11 SINE 100  
 GRAB12 SINE 100  
 GRAB13 SINE 100  
 GRAB14 SINE 100  
 GRAB15 SINE 100  
 GRAB16 SINE 100

F1 - Acquisition parameters  
 ND0 2  
 TD 256  
 SFO1 150.9194 MHz  
 FIDRES 141.330792 Hz  
 SWH 240.074 ppm  
 FWHM 0.6

F2 - Processing parameters  
 SI 600.1300281 MHz  
 SF 600.1300281 MHz  
 EM 0  
 WDW 5.00 Hz  
 SSB 0  
 LB 0  
 GB 0  
 PC 1.00

F1 - Processing parameters  
 SI 1024  
 MCZ 0  
 SF 150.9027920 MHz  
 WDW 3  
 SSB 0  
 LB 0  
 GB 0

2D NMR plot parameters  
 CZ1 18.00 cm  
 CZ2 15.00 cm  
 F2P10 7.639 ppm  
 F2L0 4584.62 Hz  
 F2PH1 1.285 ppm  
 F2H 771.19 Hz  
 F1P10 126.057 ppm  
 F1L0 19022.34 Hz  
 F1PH1 18.903 ppm  
 F1H 2852.44 Hz  
 F2PPMCM 0.35302 ppm/cm  
 F2HZCM 211.85754 Hz/cm  
 F1PPMCM 7.14362 ppm/cm  
 F1HZCM 1077.99280 Hz/cm

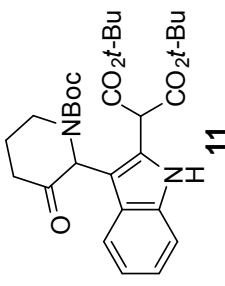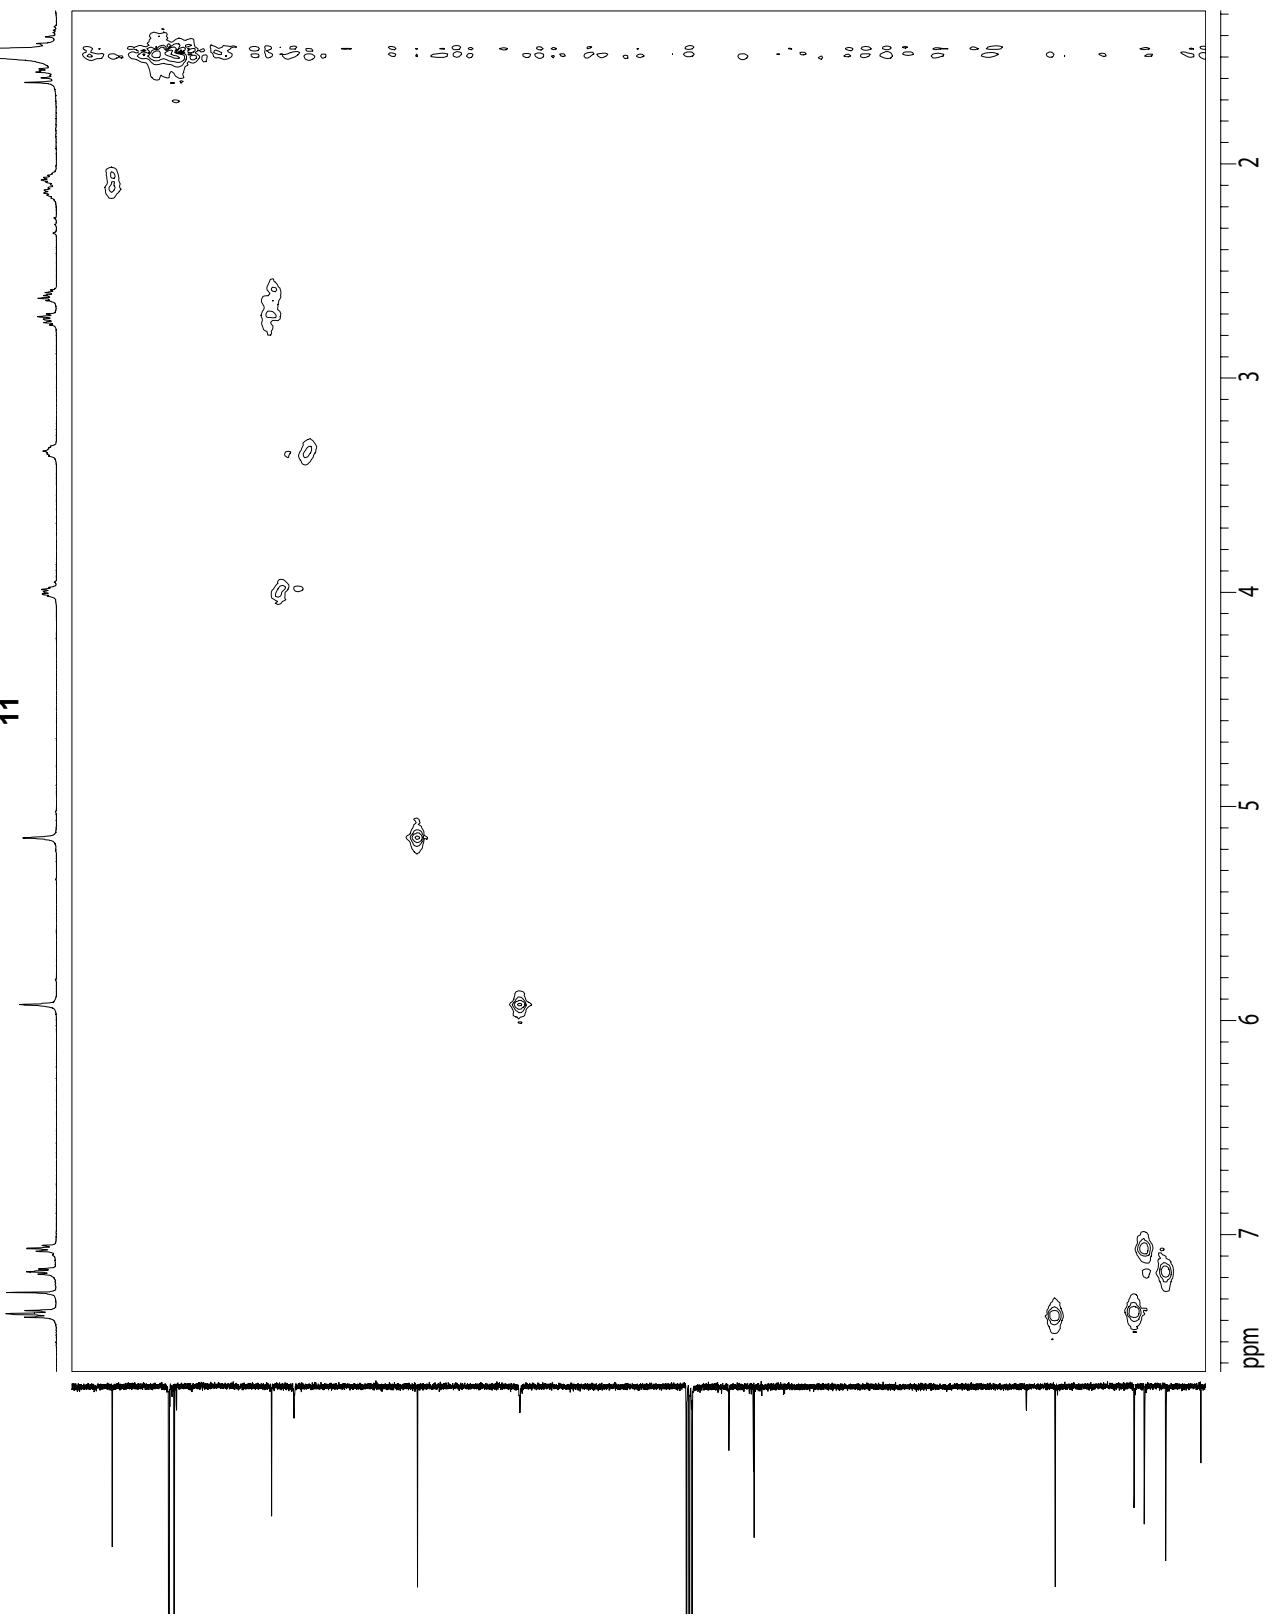

ghnqc

<sup>1</sup>H spectrum

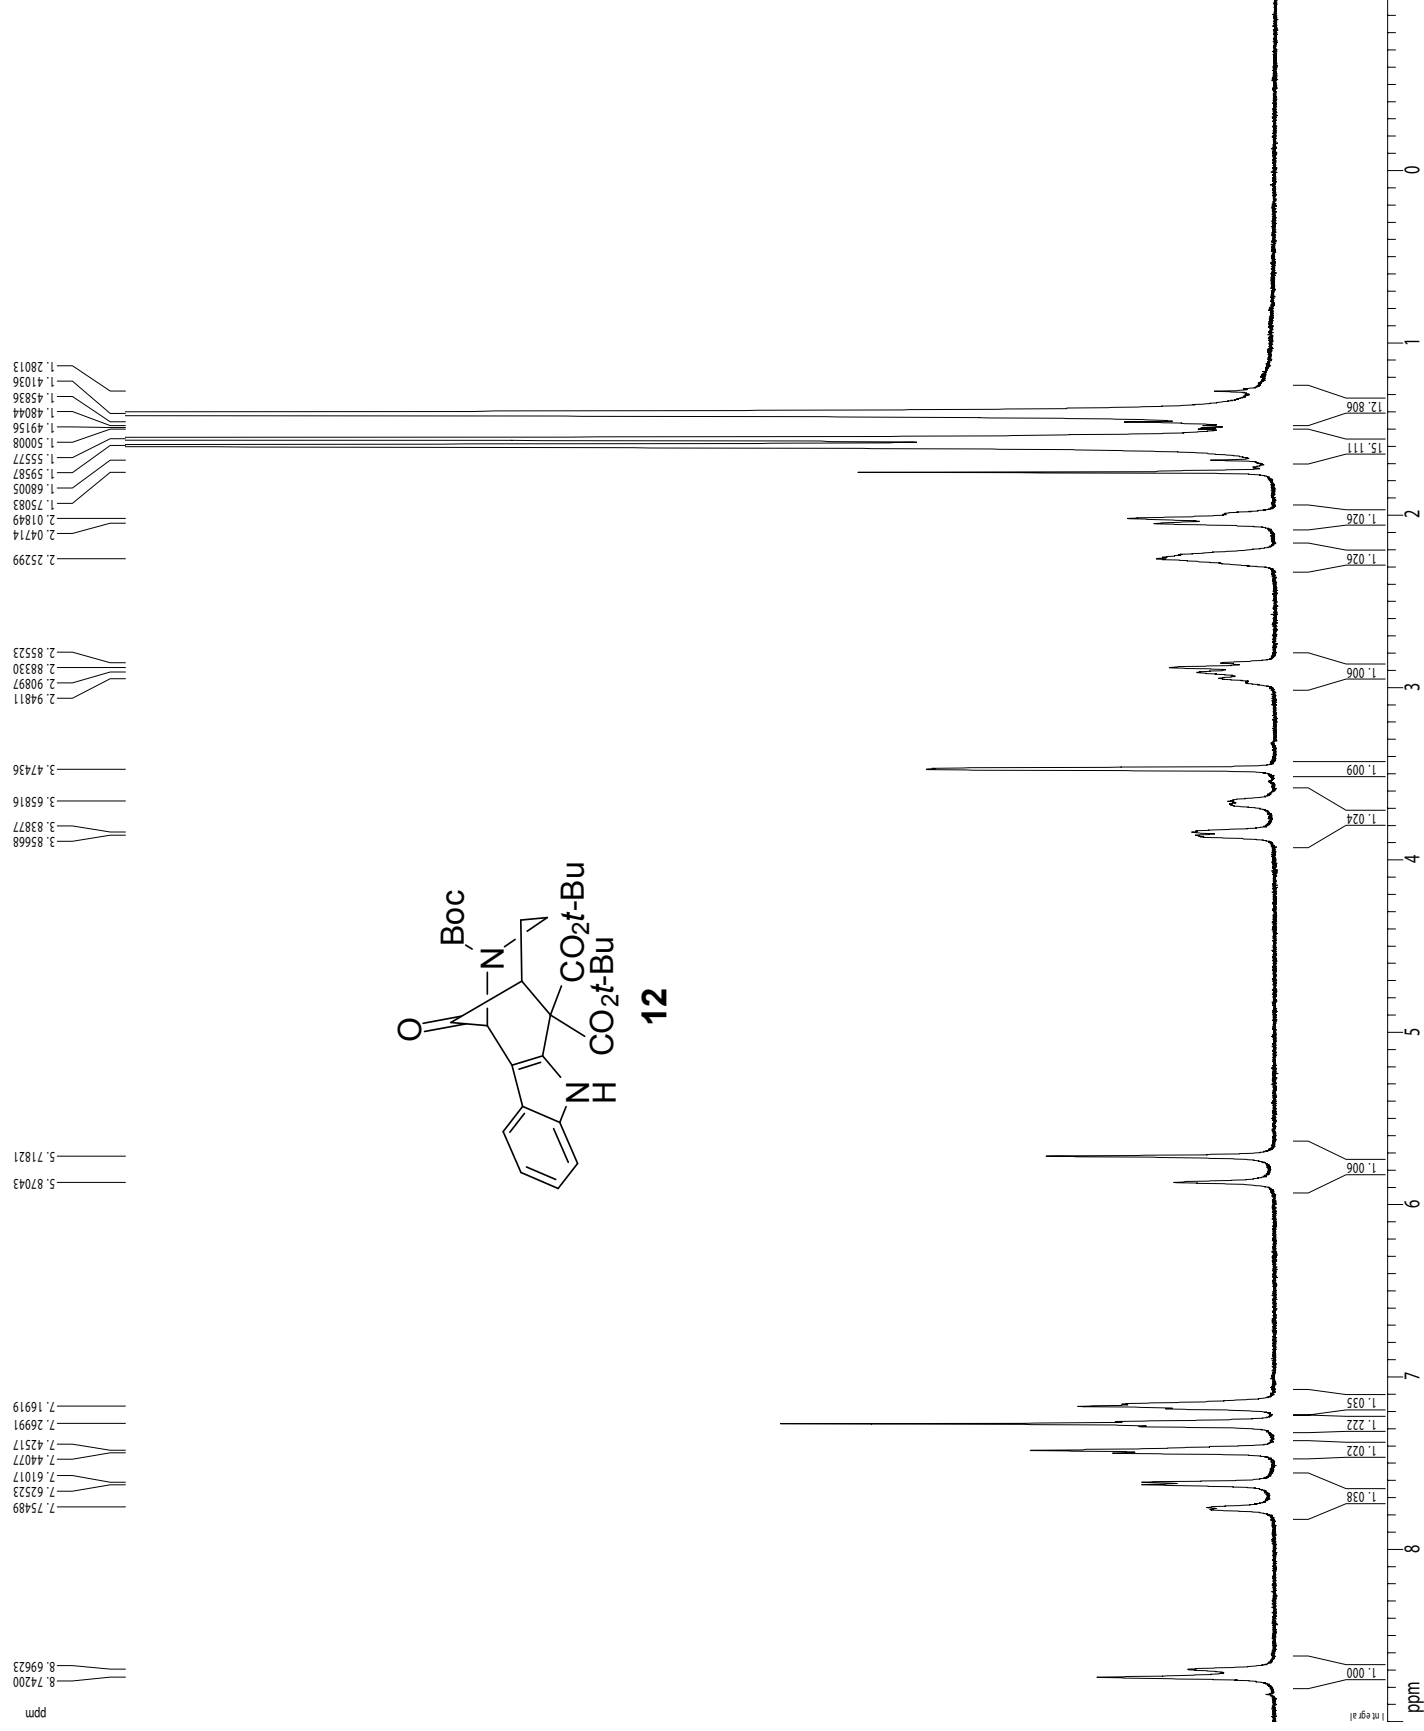

Current Data Parameters  
 USER: commor  
 NAME: CLM1-219C  
 EXPNO: 5  
 PROCNO: 1

F2 - Acquisition Parameters  
 Date\_: 20070915  
 Time: 14.01  
 INSTRUM: cryo500  
 PULPROG: zgpg30  
 PREPRG2: 5 mmCPTCL1P  
 TD: 81728  
 TO: 81728  
 SOLVENT: CDCl3  
 NS: 1  
 DS: 2  
 SWH: 8012.820 Hz  
 FIDRES: 0.098043 Hz  
 AQ: 5.0988774 sec  
 RG: 4  
 DW: 62.400 usec  
 DE: 6.00 usec  
 TE: 298.0 K  
 D1: 0.1000000 sec  
 DCREST: 0.0000000 sec  
 ACQRK: 0.01500000 sec

===== CHANNEL f1 =====  
 NUC1: 1H  
 P1: 8.00 usec  
 PL1: 1.60 dB  
 SFO1: 500.2235015 MHz

F2 - Processing parameters  
 SI: 65536  
 SF: 500.220256 MHz  
 WDW: no  
 SSB: 0.00 Hz  
 GB: 0.00 Hz  
 PC: 4.00

ID NAME pl or parameter  
 CX: 22.80 cm  
 CY: 73.96 cm  
 F1P: 9.000 ppm  
 F1: 4501.98 Hz  
 F2P: -1.000 ppm  
 F2: -500.22 Hz  
 PPRCM: 0.43860 ppm/cm  
 HZCM: 219.39476 Hz/cm

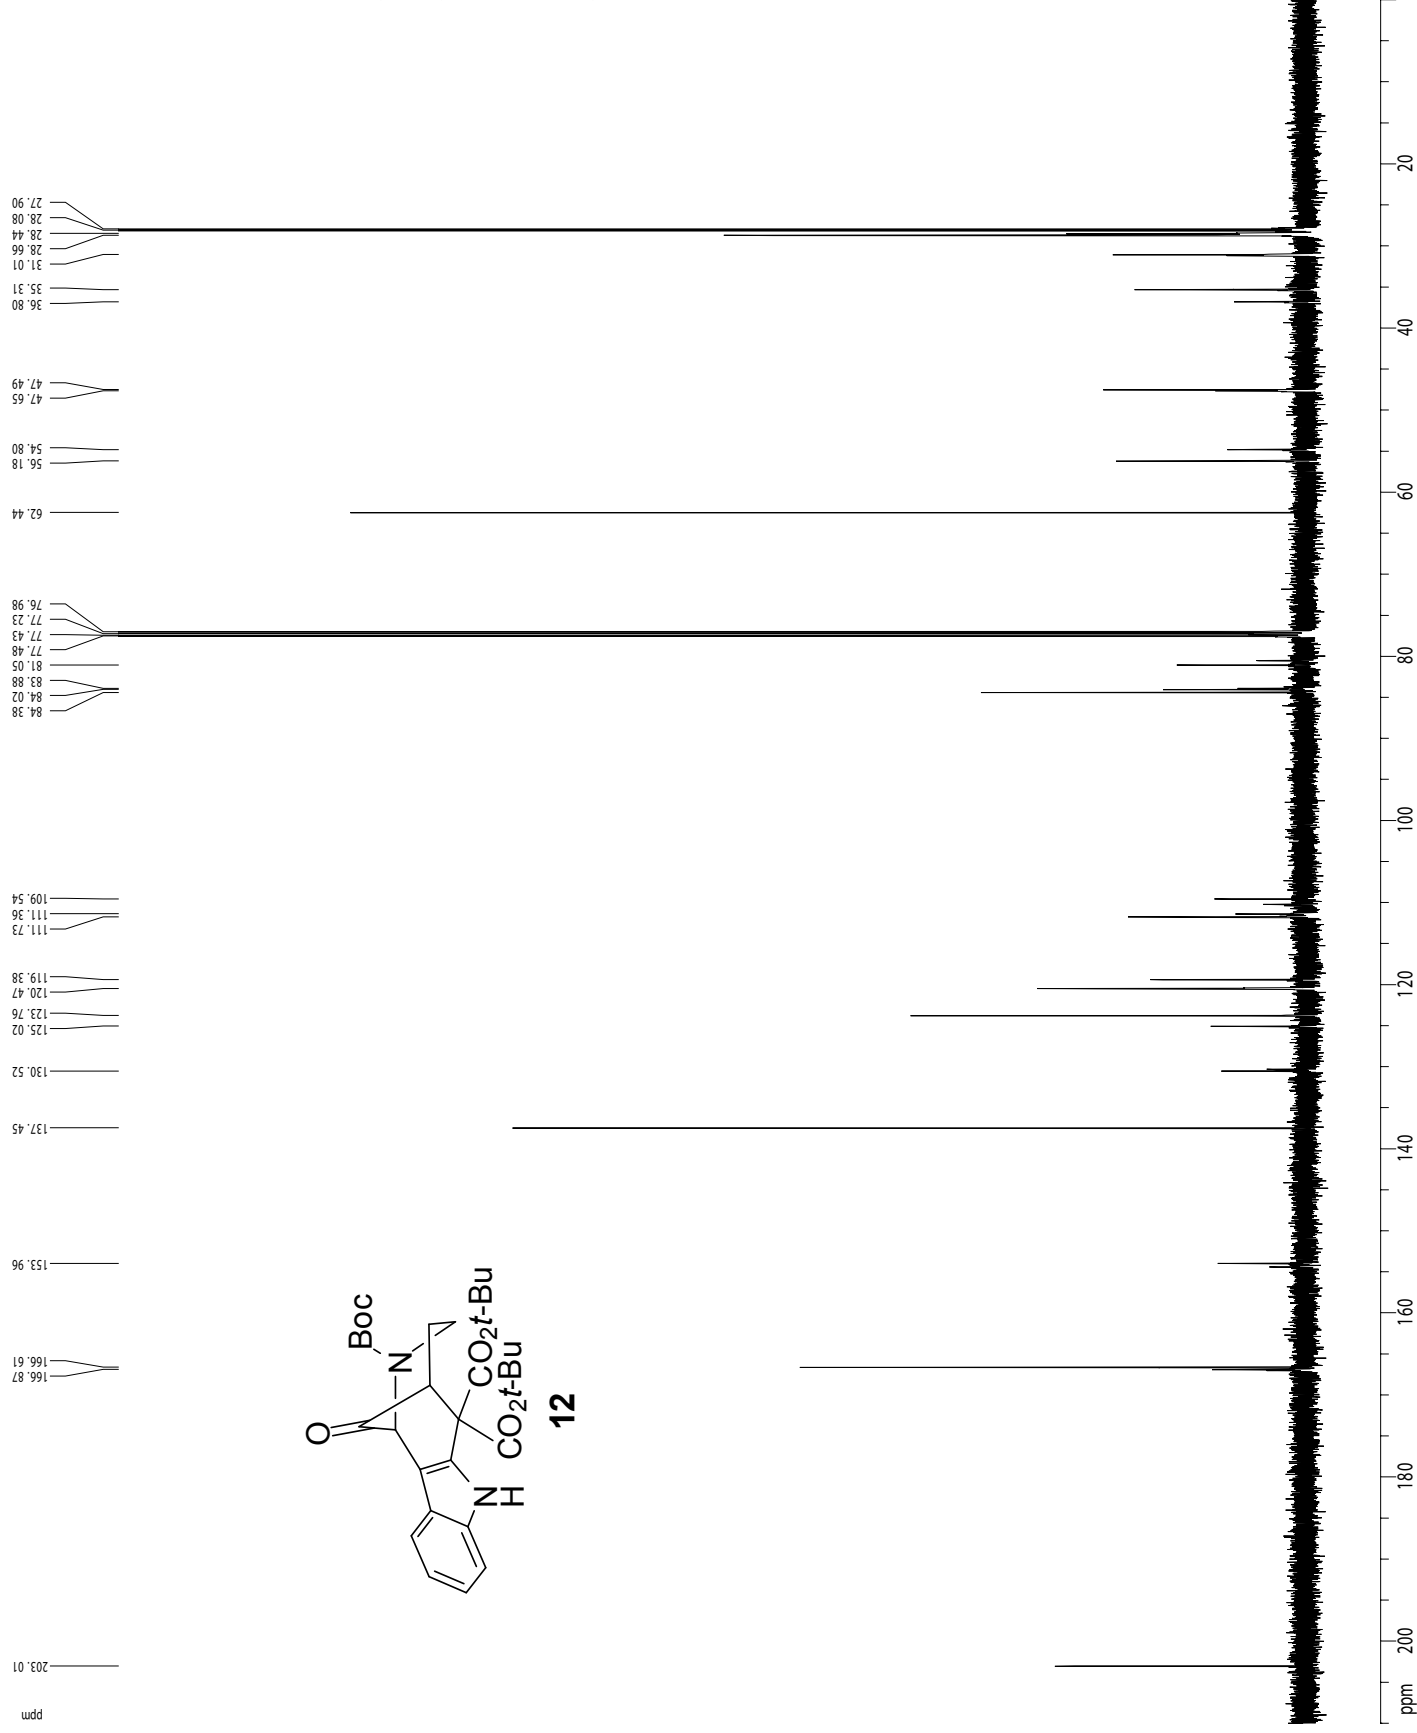

Current Data Parameters  
 USER conor  
 NAME CLM1-219C  
 EXPNO 7  
 PROCNO 1

F2 - Acquisition Parameters  
 Date\_ 20070915  
 Time 14.04  
 INSTRUM cryo500  
 PROBHD 5 mm CPTCL 1H  
 PULPROG zgpg30  
 TD 65418  
 SOLVENT CDCl3  
 NS 334  
 SWH 30903.031 Hz  
 FIDRES 0.46322 Hz  
 AQ 1.0754470 sec  
 RG 8192  
 DW 16.500 usec  
 DE 6.00 usec  
 TE 298.0 K  
 d1 0.2500000 sec  
 d11 0.0300000 sec  
 ACQRES 0.0000000 sec  
 ACQRK 0.0150000 sec

==== CHANNEL f1 =====  
 NUC1 <sup>13</sup>C  
 P1 15.00 usec  
 PL1 -1.00 dB  
 SFO1 125.7942546 MHz

==== CHANNEL f2 =====  
 CDPORG waltz16  
 NUC2 <sup>1</sup>H  
 PCPD2 100.00 usec  
 PL2 1.60 dB  
 PL12 23.54 dB  
 SFO2 500.2225011 MHz

F2 - Processing parameters  
 SI 65536  
 SF 125.7864038 MHz  
 WDW no  
 SSB 0  
 LB 0.00 Hz  
 GB 0  
 PC 2.00

ID.NMR plot parameters  
 CV 22.80 cm  
 CY 54.87 cm  
 F1P 210.000 ppm  
 F2P 26413.88 Hz  
 F2 0.000 ppm  
 F2 0.00 Hz  
 PPAKM 9.21053 ppm/cm  
 HZCM 1158.50366 Hz/cm

Current Data Parameters  
USER comor  
NAME CLM1-219C  
EXPNO 4  
PROCNO 1

F2 - Acquisition Parameters  
Date\_ 20070914  
Time 17.15  
INSTRUM cryo500  
PROBHD 5 mm CPTCI TH  
PULPROG invgpgau  
TD 2048  
SOLVENT CDCl3  
DS 16  
SI 4006.410 Hz  
SF 1.956515 Hz  
AQ 0.2556404 sec  
RG 4096  
DW 124.800 usec  
DE 6.50 usec  
TE 300.2 K  
C1P2 145.000000 K  
d0 0.00000000 sec  
d1 1.00000000 sec  
d2 0.00344828 sec  
d12 0.00002000 sec  
d13 0.00000300 sec  
d16 0.00020000 sec  
d20 0.0042228 sec  
IN0 0.0001656 sec

==== CHANNEL f1 =====  
NUC1 1H  
P1 8.00 usec  
P2 16.00 usec  
PL1 1.60 dB  
SFO1 500.2225011 MHz

==== CHANNEL f2 =====  
CPDPRG2 zgpg30  
NUC2 13C  
P3 15.00 usec  
PCPD2 65.00 usec  
PL2 -1.00 dB  
PL12 11.80 dB  
SFO2 125.7942548 MHz

==== GRAB F1F2 CHANNEL =====  
GPNMR sine 100  
GPNMRB sine 100  
GPX1 0.00 %  
GPX2 0.00 %  
GPX3 0.00 %  
GPY1 0.00 %  
GPY2 0.00 %  
GPY3 0.00 %  
GPZ1 30.00 %  
GPZ2 18.00 %  
GPZ3 24.00 %  
P16 1000.00 usec

F1 - Acquisition parameters  
NUC1 13C  
SF01 125.7943 MHz  
FIDRES 117.924630 Hz  
SI 239.985 ppm  
F1MODE undefined

F2 - Processing parameters  
SI 1024  
SF 500.2200256 MHz  
WDW EM  
SSB 0  
LB 5.00 Hz  
GB 0  
PC 2.00

F1 - Processing parameters  
SI 1024  
SF 125.7804928 MHz  
WDW EM  
SSB 3  
LB 0.00 Hz  
GB 0

2D NMR plot parameters  
CXZ 15.00 cm  
CXY 15.00 cm  
F2LO 8.085 ppm  
F2L1 4044.42 Hz  
F2PH 1.101 ppm  
F2H 550.55 Hz  
F1LO 130.512 ppm  
F1LO 16415.86 Hz  
F1PH 18.710 ppm  
F1PH 2333.96 Hz  
F1PMCM 0.50000000 ppm/cm  
F2PMCM 7.45347 ppm/cm  
F1HZCM 937.50000 Hz/cm

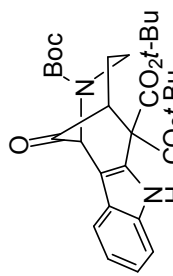

ghmrc

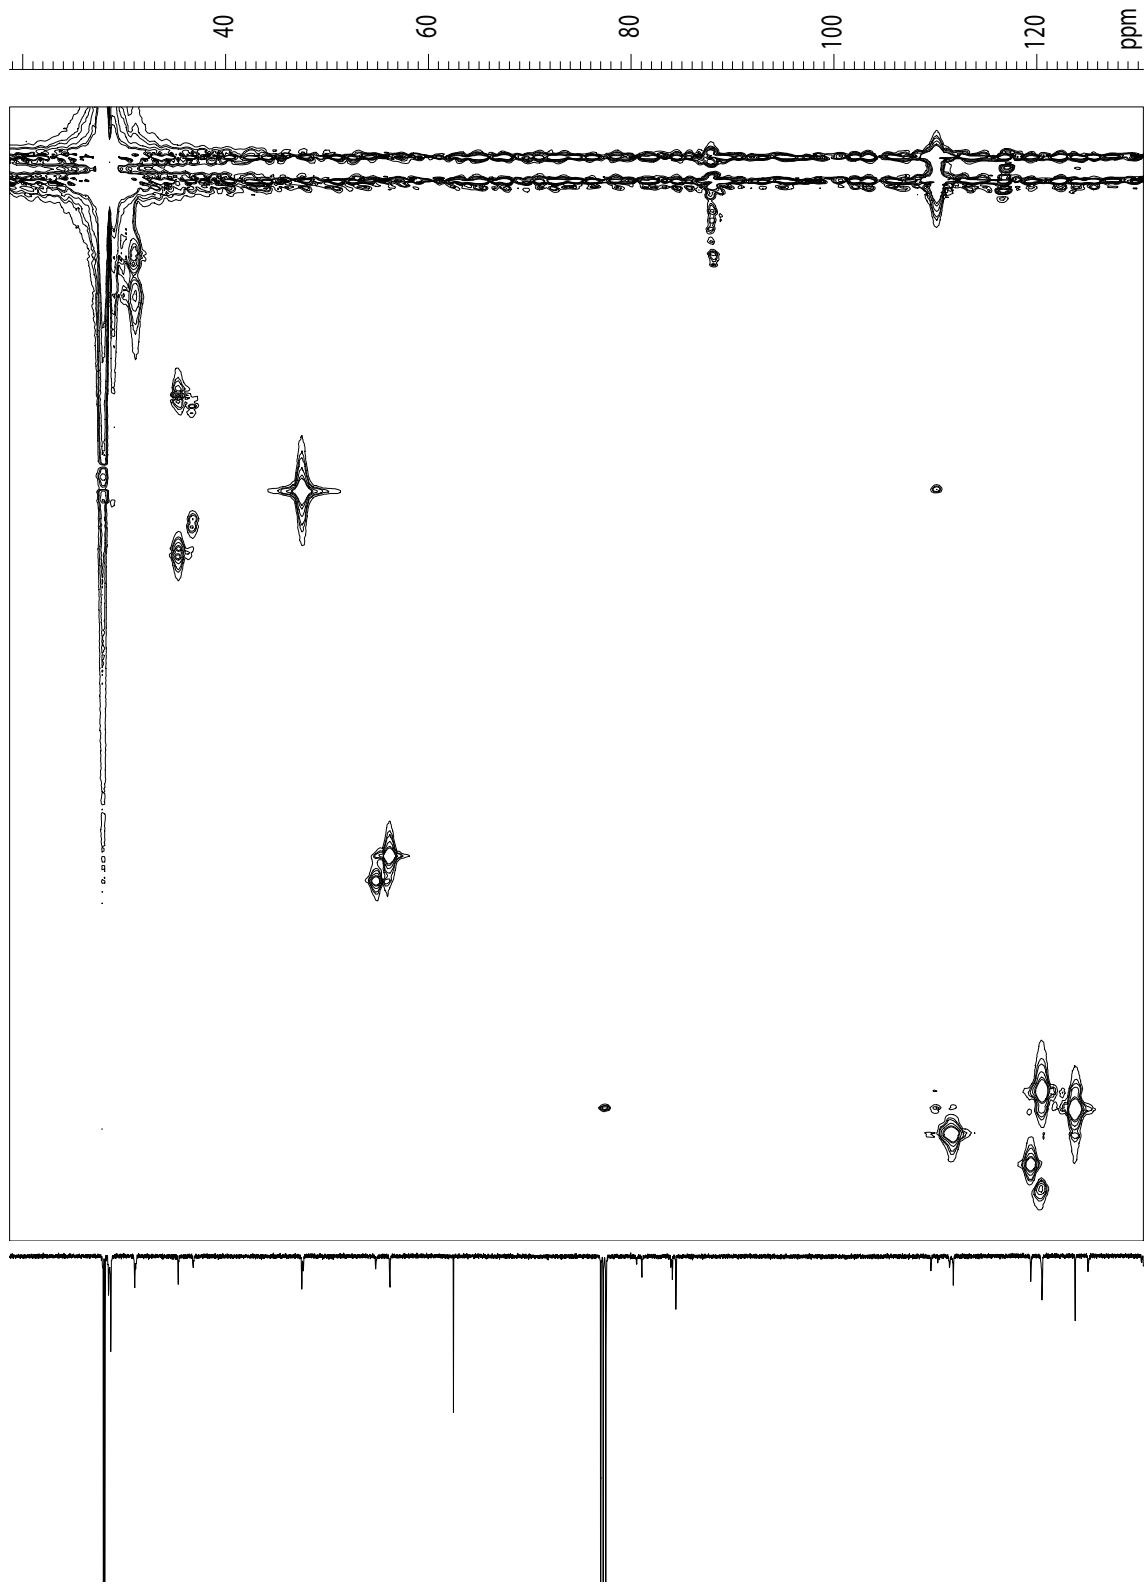

40 60 80 100 120 ppm

2 3 4 5 6 7 ppm

Current Data Parameters

USER commo  
NAME CLM1-219C  
EXPNO 12  
PROCNO 1

F2 - Acquisition Parameters

Date\_ 20080413  
Time 15.03  
INSTRUM cryos00  
PROBHD 5 mm CPTC 1H  
PULPROG cosygp  
TD 2048  
SOLVENT CDCl3  
NS 1  
DS 16

SWH 4006.410 Hz  
FIDRES 1.956255 Hz  
AQ 0.2556404 sec  
RG 35.9  
DW 124.800 usec  
DE 6.00 usec  
TE 298.0 K  
D0 0.00000300 sec  
D1 1.00000000 sec  
D13 0.00000300 sec  
D16 0.00020000 sec  
TNO 0.00024989 sec

CHANNEL f1

NUC1 1H  
P0 7.38 usec  
P1 7.38 usec  
PL1 1.60 dB  
SFO1 500.2225011 MHz

GRABENT CHANNEL

GRABM1 sine 100  
GRABM2 sine 100  
GPX1 0.00 %  
GPX2 0.00 %  
GPY1 0.00 %  
GPY2 0.00 %  
GPZ1 17.00 %  
GPZ2 17.00 %  
PI6 1000.00 usec

F1 - Acquisition parameters

ND 256  
TD 500.2225 MHz  
SFO1 15.632034 Hz  
FIDRES 8.000 ppm  
SW undefi ned

F2 - Processing parameters

SF 1024  
SF 500.2200256 MHz  
WDW SINE  
SSB 0  
LB 0.00 Hz  
GB 0  
PC 4.00

F1 - Processing parameters

SF 1024  
CF 500.2200256 MHz  
WDW SINE  
SSB 0  
LB 0.00 Hz  
GB 0

2D NMR plot parameters

CX 15.00 cm  
CY 15.00 cm  
F2P0 8.813 ppm  
F2L0 4408.28 Hz  
F2P1 1.241 ppm  
F2L1 620.97 Hz  
F1P0 8.808 ppm  
F1L0 4406.06 Hz  
F1P1 1.246 ppm  
F1L1 623.10 Hz  
F2P1M0 0.50475 ppm/cm  
F2L1M0 252.48732 Hz/cm  
F1P1M1 0.50417 ppm/cm  
F1L1M1 252.19682 Hz/cm

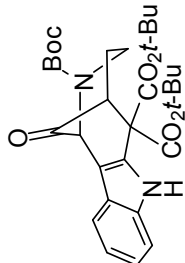

gcosp

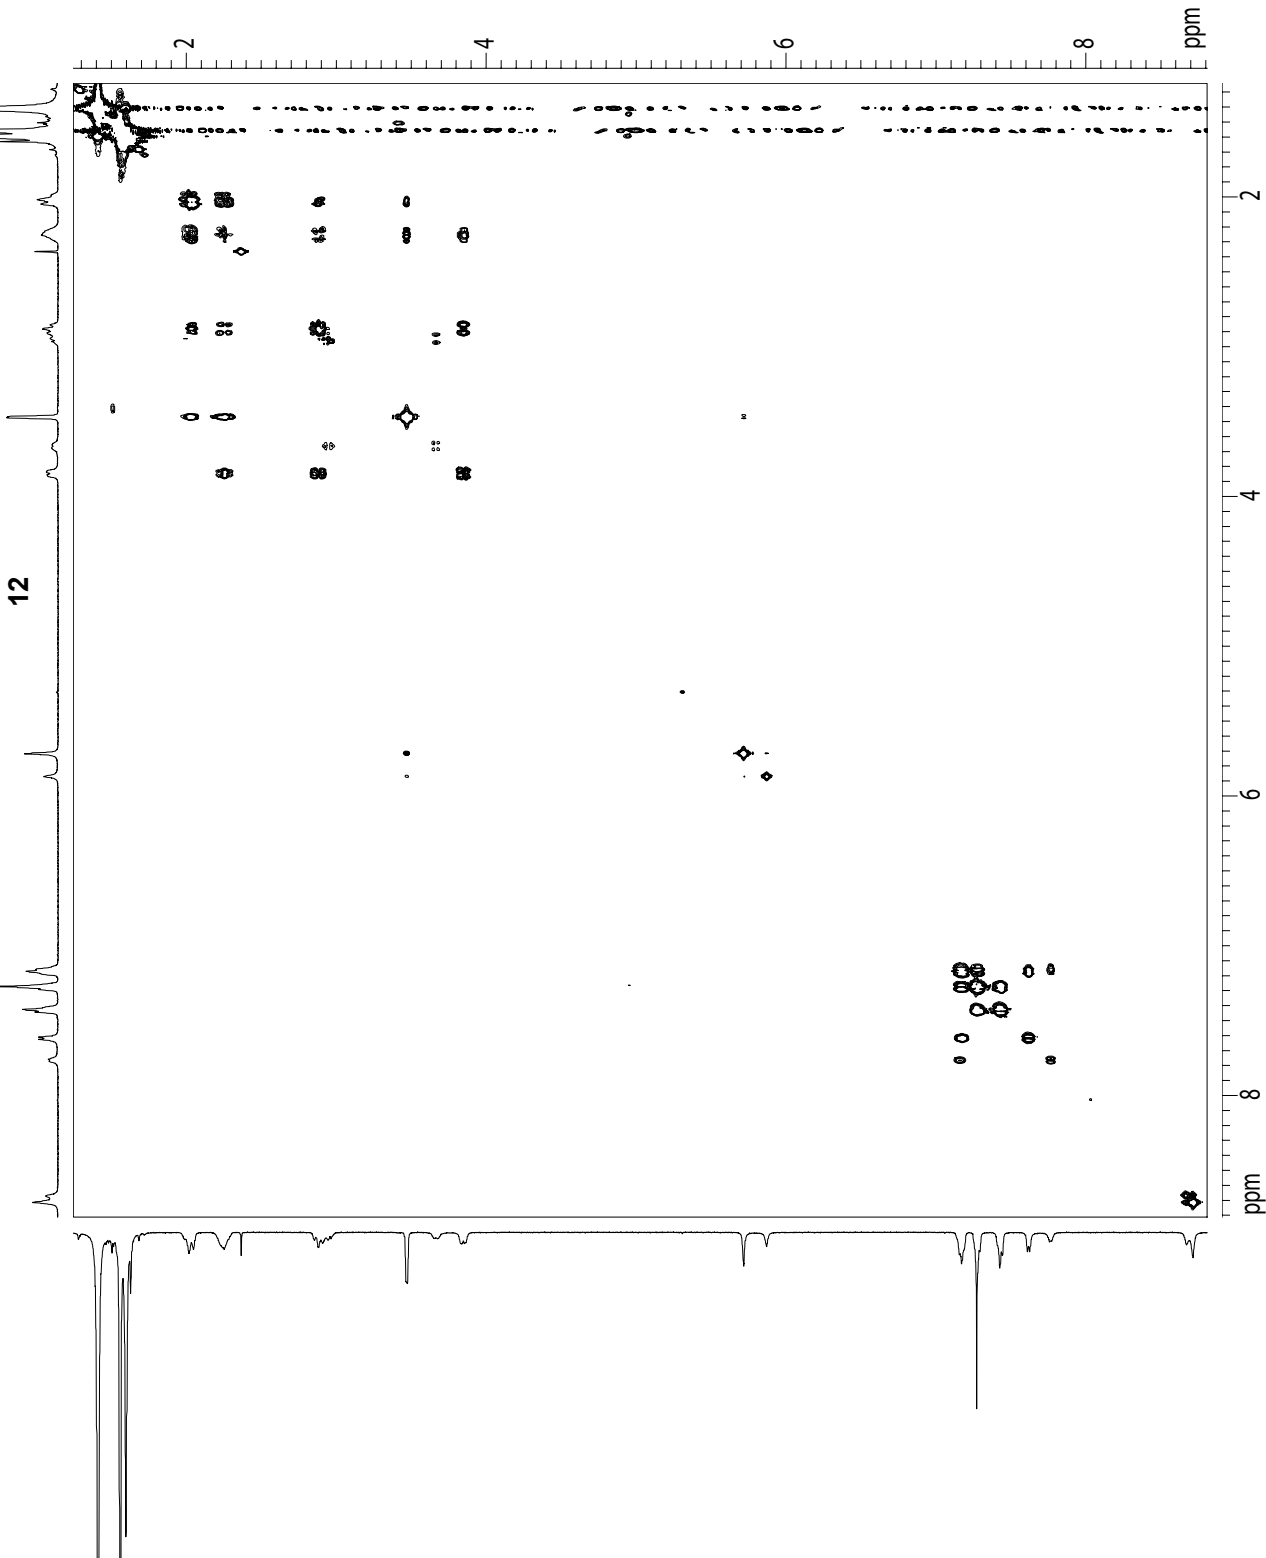

Current Data Parameters  
 USER conor  
 NAME CLM1-219C  
 EXPNO 13  
 PROCNO 1

F2 - Acquisition Parameters

Date\_ 20080713  
 INSTRUM spect  
 PROBRD 5 mm CPCL 1H  
 PULPROG ghmcc\_wu  
 TD 2048  
 SOLVENT CDCl3  
 NS 2  
 DS 16  
 SVH 4006.410 Hz  
 FIDRES 1.956255 Hz  
 AQ 0.255604 sec  
 RG 49960  
 DW 124.000 usec  
 DE 6.000 usec  
 TE 298.0 K  
 CHST2 145.0000000  
 d0 0.0000300 sec  
 d1 1.2500000 sec  
 d2 0.00344828 sec  
 d6 0.0500000 sec  
 d13 0.0000300 sec  
 d16 0.0002000 sec  
 TND 0.0001656 sec

==== CHANNEL f1 =====  
 NUC1 1H  
 P1 7.38 usec  
 PL1 14.75 usec  
 PL2 1.60 dB  
 SFO1 500.2225011 MHz

==== CHANNEL f2 =====  
 NUC2 13C  
 P3 14.75 usec  
 PL2 0.00 dB  
 SFO2 125.7942546 MHz

==== GRAB ENT CHANNEL =====  
 GPNAM1 si ne. 100  
 GPNAM2 si ne. 100  
 GPNAM8 si ne. 100  
 GPX1 0.00 %  
 GPX2 0.00 %  
 GPX3 0.00 %  
 GPY1 0.00 %  
 GPY2 0.00 %  
 GPY3 0.00 %  
 GPZ1 30.00 %  
 GPZ2 40.00 %  
 GPZ3 40.00 %  
 PT6 1000.00 usec

F1 - Acquisition parameters  
 NDO 2  
 TD 256  
 SFO1 125.7943 MHz  
 FIDRES 117.94530 Hz  
 SW 239.985 ppm  
 FWHM undefined

F2 - Processing parameters  
 SI 1024  
 SF 500.2202556 MHz  
 WDW SINE  
 SSB 0  
 LB 0.00 Hz  
 GB 0  
 PC 1.40

F1 - Processing parameters  
 SI 104  
 SF 125.7804038 MHz  
 WDW SINE  
 SSB 0  
 LB 0.00 Hz  
 GB 0

2D NMR plot parameters  
 CX1 15.00 cm  
 F2PLO 8.797 ppm  
 F2 440.164 ppm  
 F2PHI 597.50 Hz  
 FTPL0 206.687 ppm  
 FILO 25997.23 Hz  
 F1PHI 23.398 ppm  
 F1H 2942.98 Hz  
 F2PPHOM 0.50684 ppm/cm  
 F2HCCM 253.53065 Hz/cm  
 F1PPHOM 12.21931 ppm/cm  
 F1HCCM 1536.94971 Hz/cm

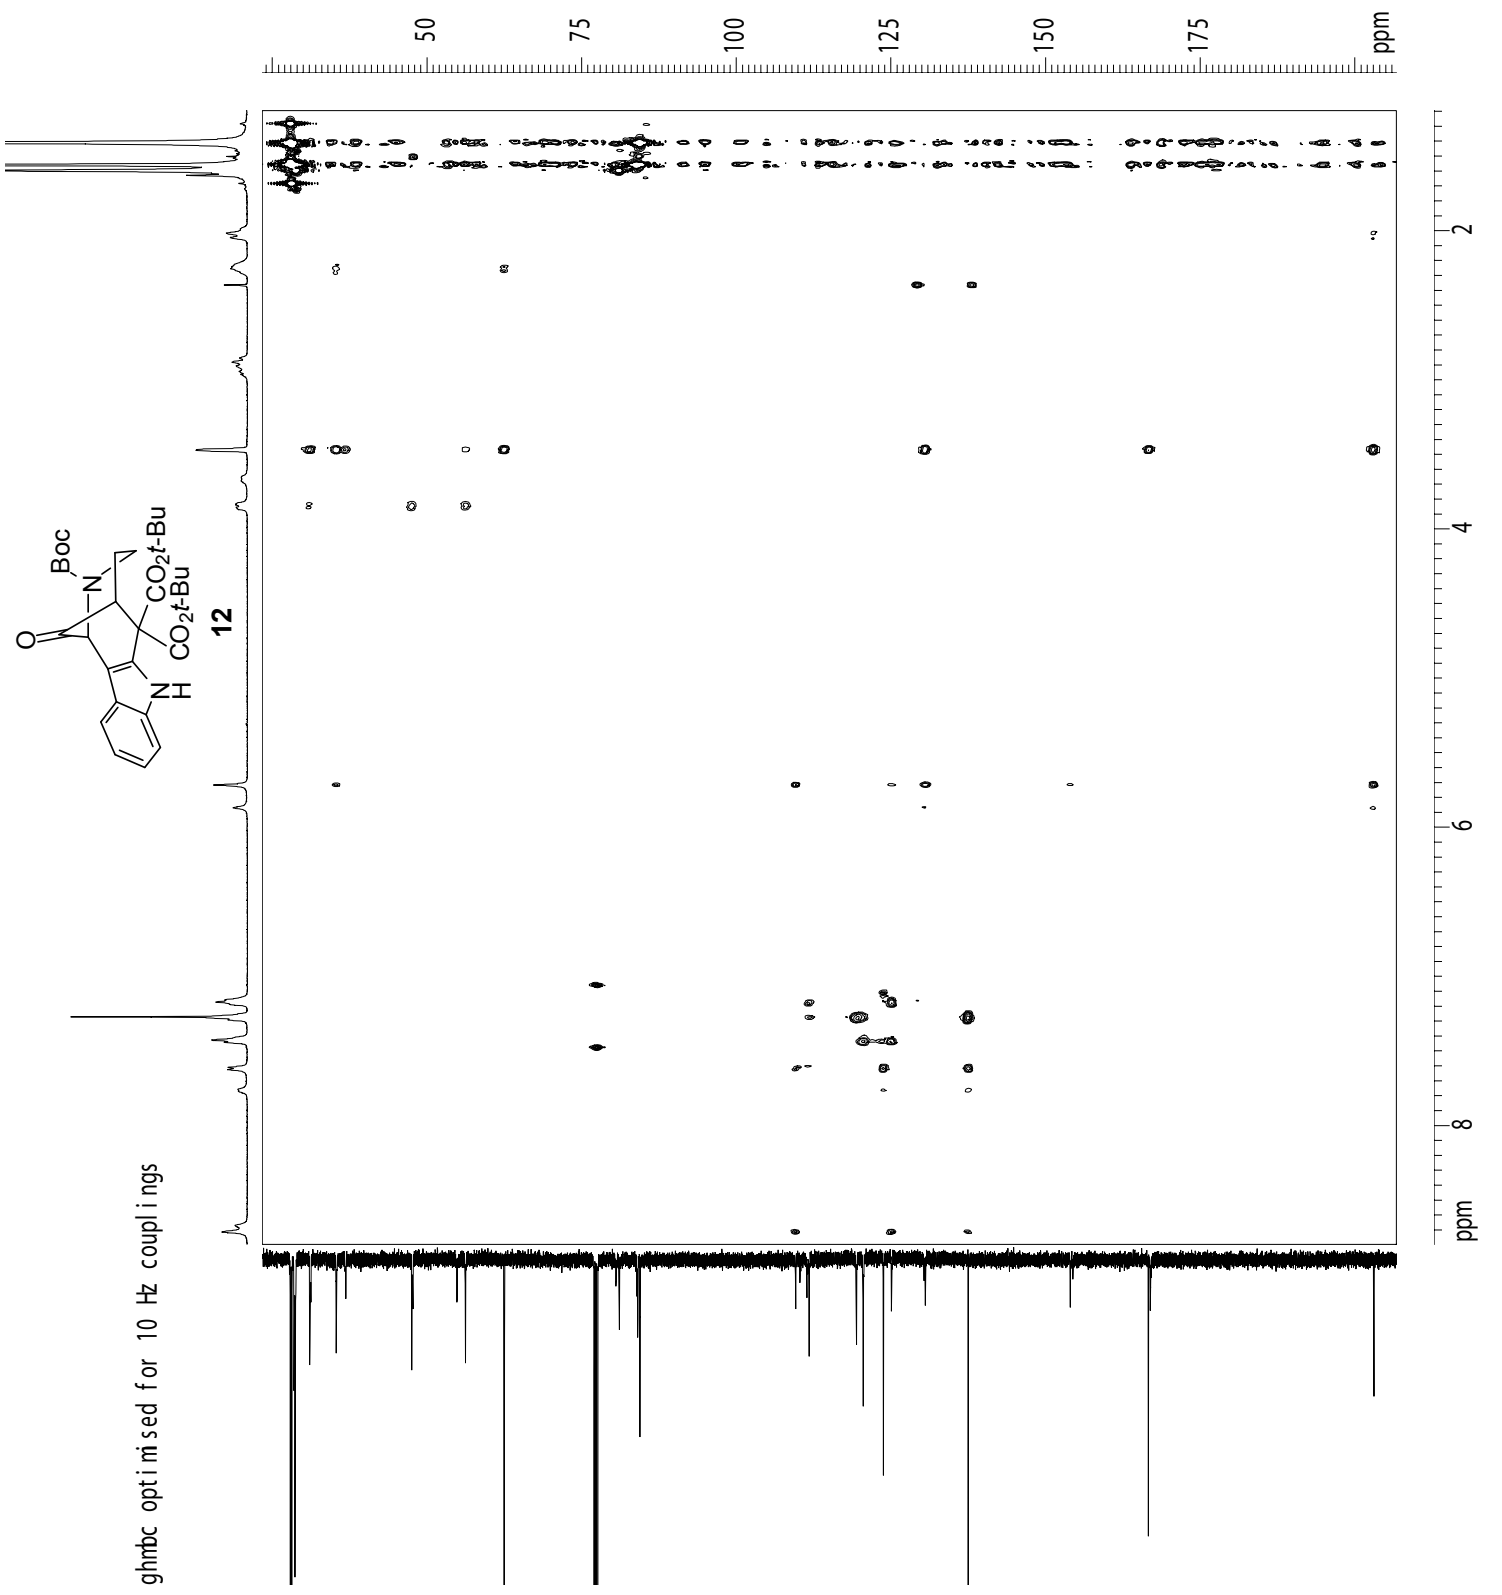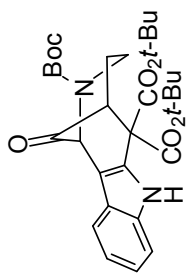

ghmcc optimized for 10 Hz couplings

<sup>1</sup>H spectrum

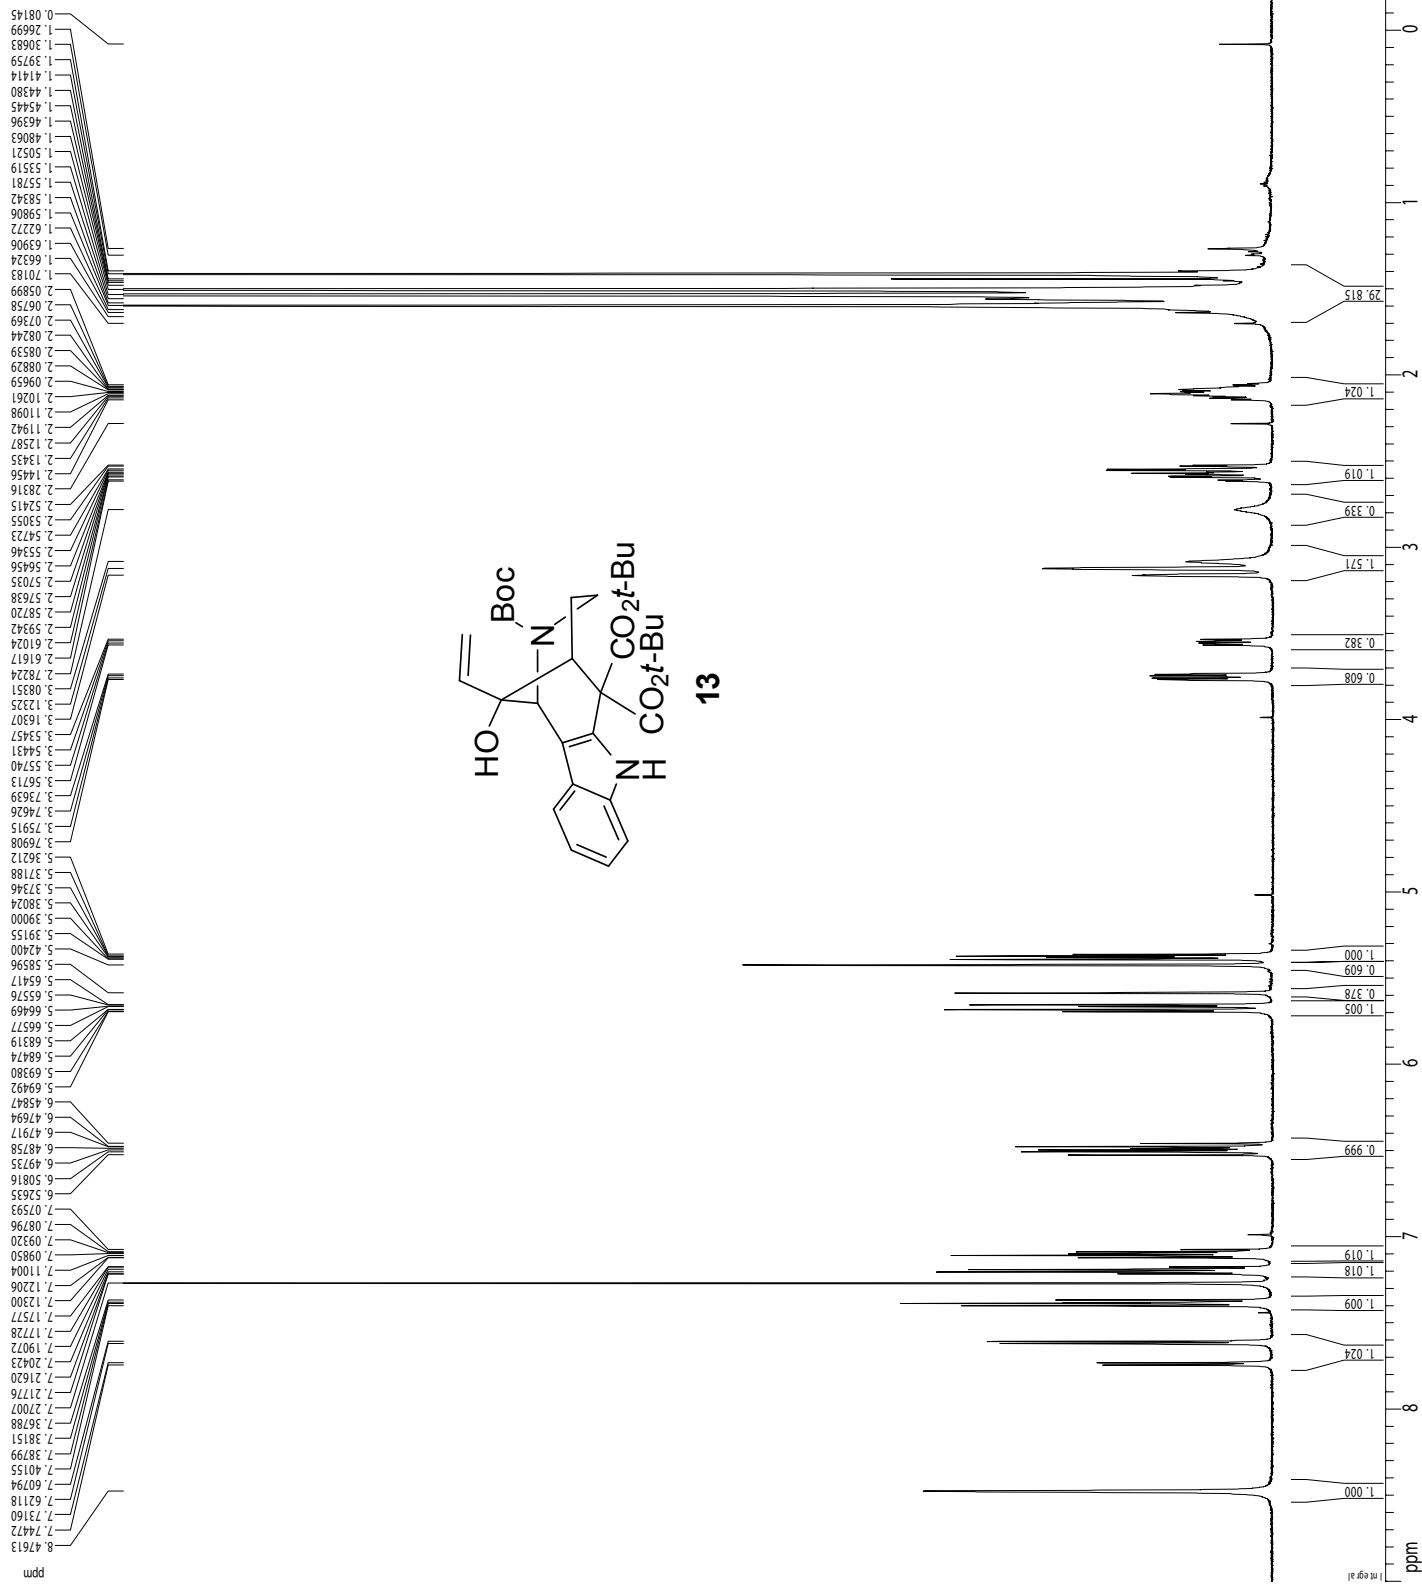

Current Data Parameters  
 USER conor  
 NAME vinylgrig-char  
 EXPNO 12  
 PRCCNO 1

F2 - Acquisition Parameters  
 Date\_ 20080416  
 Time 16.50  
 INSTRUM av600  
 PRCBHD 5 mmTBI 1H/13  
 PULPROG zg30  
 ID 97938  
 SOLVENT CDCl3  
 NS 33  
 SWH 9615.385 Hz  
 FIDRES 0.098178 Hz  
 AQ 5.0928259 sec  
 RG 228  
 DW 52.000 usec  
 DE 6.00 usec  
 TE 298.2 K  
 DT 0.10000000 sec  
 TDO 1

===== CHANNEL f1 =====  
 NUC1 1H  
 P1 8.00 usec  
 PL1 -1.00 dB  
 SFO1 600.1342009 MHz

F2 - Processing parameters  
 SI 65585  
 SF 600.1300292 MHz  
 WDW 1000  
 SSB 0  
 LB 0.00 Hz  
 GB 0  
 PC 1.00

1D NMR plot parameters  
 CX 22.80 cm  
 CY 166.02 cm  
 FIP 9.000 ppm  
 F1 5401.17 Hz  
 F2P -1.000 ppm  
 F2 -600.13 Hz  
 PPKCM 0.43860 ppm/cm  
 HZCM 263.2494 Hz/cm

<sup>13</sup>C spectrum with <sup>1</sup>H decoupling

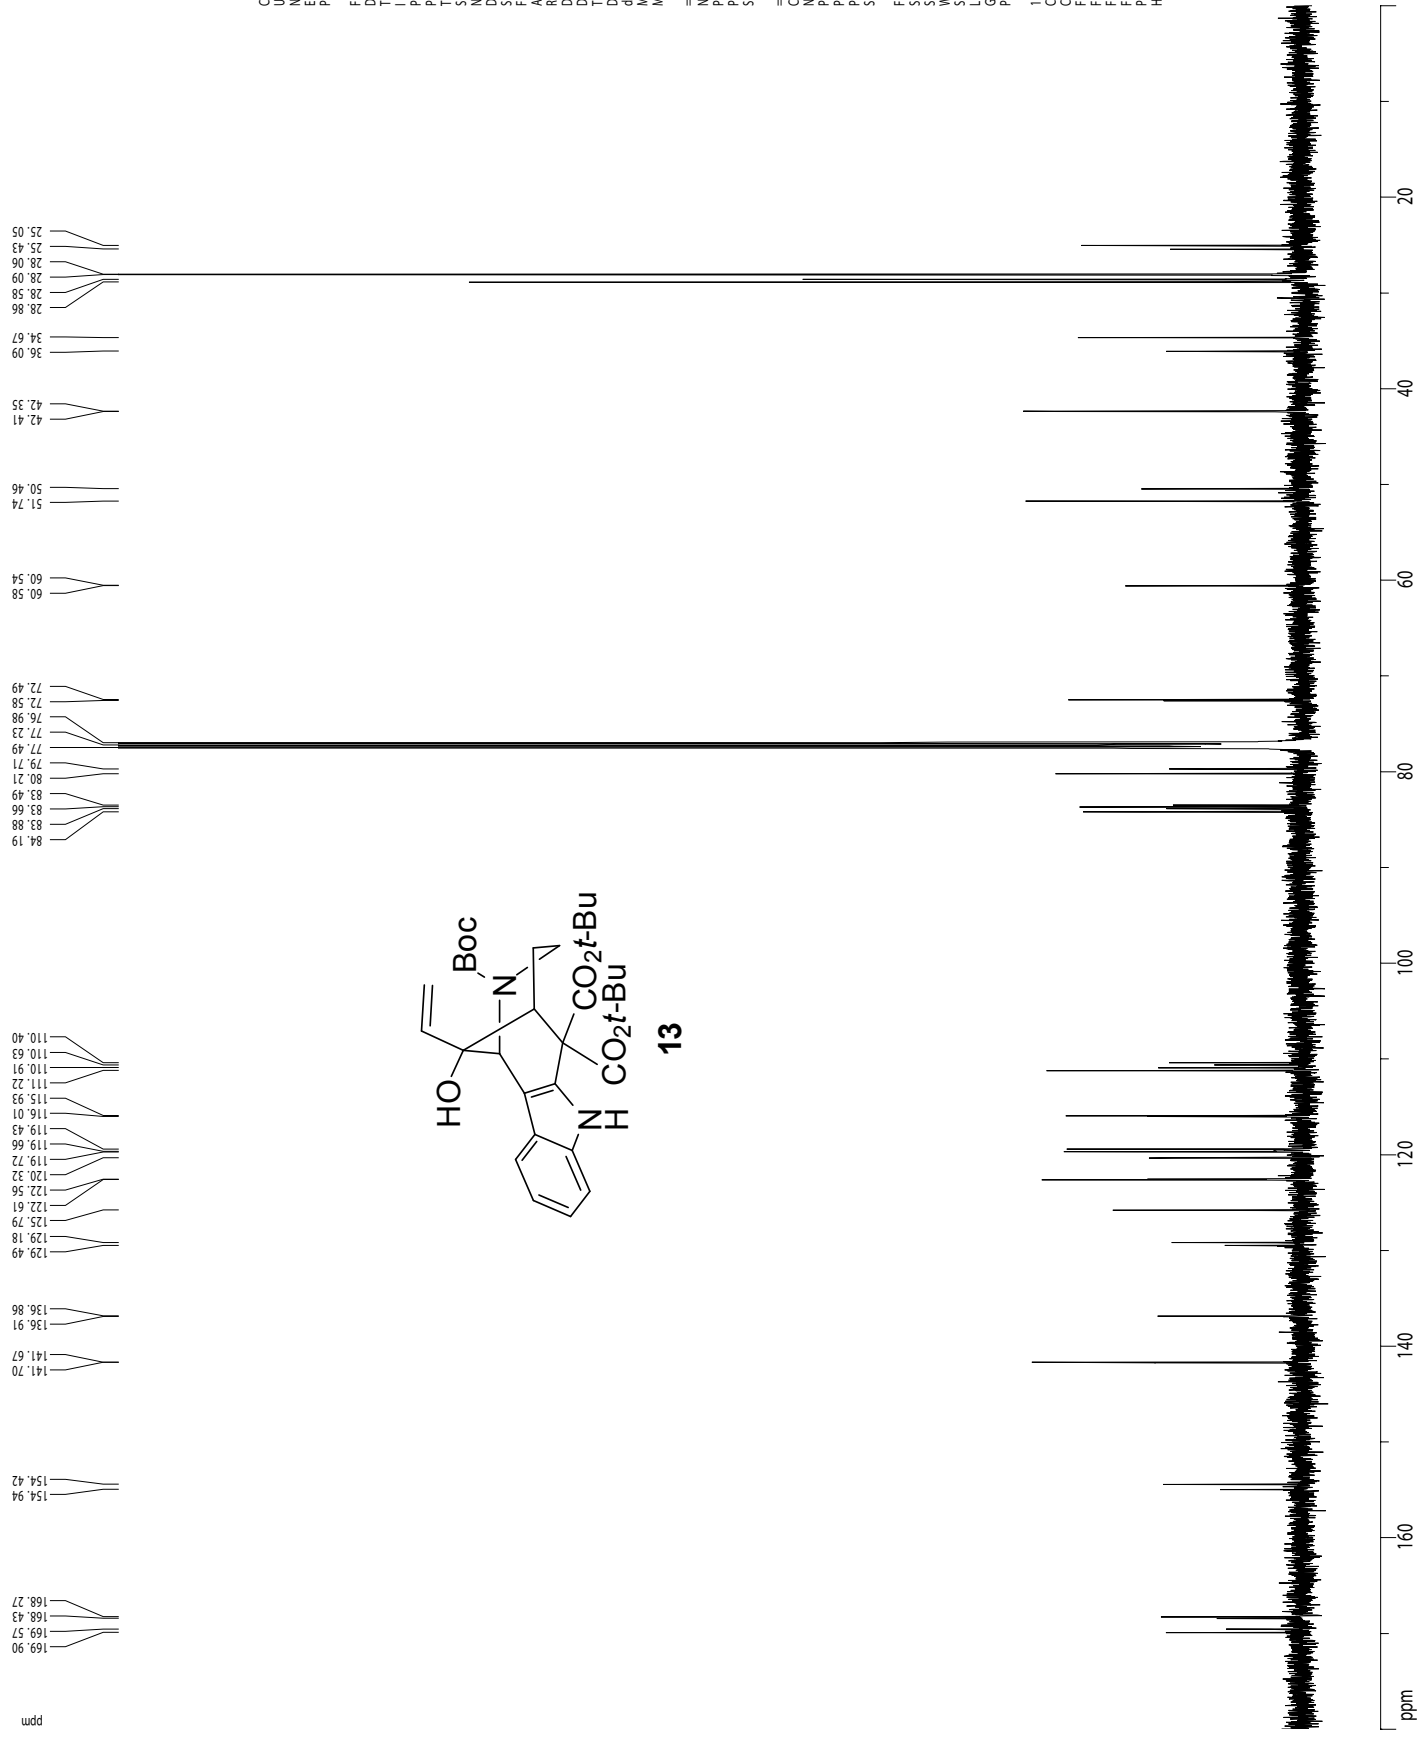

```

Current Data Parameters
=====
USER      connor
NAME      vinylgrig-char
EXPNO    4
PROCNO    1

F2 - Acquisition Parameters
=====
Date_     20080416
Time      17.01
INSTRUM   cryo500
PROBHD    5 mmCPTCL 1H
PULPROG   zgpg30
TD         65418
SOLVENT   CDCl3
NS         950
DS         4
SWH        30903.031 Hz
FIDRES     0.463222 Hz
AQ          1.0754470 sec
RG          16384
DW          16.500 usec
DE          6.00 usec
TE          298.0 K
d11         0.2500000 sec
d12         0.0300000 sec
d13         0.0000000 sec
d14         0.0150000 sec
ACQRES    0.0150000 sec
===== CHANNEL f1 =====
NUC1       13C
P1         14.75 usec
PL1        -1.00 dB
SFO1       125.7942546 MHz
===== CHANNEL f2 =====
COPPRG2   waltz16
NUC2       1H
PCPD2     100.00 usec
PL2        1.60 dB
PL12       24.80 dB
SFO2       500.2225011 MHz

F2 - Processing parameters
=====
SI         65536
SF         125.7803988 MHz
WDW        EM
SSB        0
LB         1.00 Hz
GB         0
PC         2.00

ID:IMP:plot:parameters
=====
CV         272.80 cm
CY         107.33 cm
F1P        180.000 ppm
F1P        22640.47 Hz
F2P        0.000 ppm
F2P        0.00 Hz
PP4CM      7.89474 ppm/cm
HZCM       993.00317 Hz/cm
    
```



Current Data Parameters  
USER comor  
NAME CLM1-243B  
EXPNO 5  
PROCNO 1

F2 - Acquisition Parameters

Date\_ 20071005  
Time 23.38  
INSTRUM cryo500  
PROBHD 5 mm CPTCI TH  
PULPROG invgpa.wu  
TD 2048  
SOLVENT CDCl3  
DS 16  
SWH 4006.410 Hz  
FIDRES 1.95655 Hz  
AQ 0.2556404 sec  
RG 3251  
DW 124.800 usec  
DE 6.50 usec  
TE 300.2 K  
CNS72 145.000000 sec  
d0 0.0000000 sec  
d1 1.0000000 sec  
d2 0.00344828 sec  
d12 0.00002000 sec  
d13 0.00000300 sec  
D16 0.00020000 sec  
d20 0.0042228 sec  
LNO 0.0001800 sec

==== CHANNEL f1 =====  
NUC1 H  
P1 8.00 usec  
P2 16.00 usec  
PL1 1.60 dB  
SFO1 500.2225011 MHz

==== CHANNEL f2 =====  
CPDPRG2 zgpg30  
NUC2 13C  
P3 15.00 usec  
PCPD2 65.00 usec  
PL2 -1.00 dB  
PL12 11.80 dB  
SFO2 125.7942548 MHz

==== GRAB F1F2 CHANNEL =====  
GPNMR sine 100  
GPNMRB sine 100  
GPA1 0.00 %  
GPA2 0.00 %  
GPA3 0.00 %  
GPA4 0.00 %  
GPA5 0.00 %  
GPA6 0.00 %  
GPA7 30.00 %  
GPA8 18.00 %  
GPA9 24.00 %  
GPA10 1000.00 usec

F1 - Acquisition parameters  
NUC1 13C  
SFO1 125.7943 MHz  
FIDRES 108.131485 Hz  
SW 220.055 ppm  
FMODE undefined

F2 - Processing parameters  
SI 1024  
WDW 500.2200286 MHz  
SSB 0  
LB 5.00 Hz  
GB 0  
PC 4.00

F1 - Processing parameters  
SI 1024  
WDW 125.794041 MHz  
SSB 3  
LB 0.00 Hz  
GB 0

2D NMR plot parameters  
CXZ 15.00 cm  
CXY 8.00 cm  
F2ILO 7.826 ppm  
F2IHO 3919.90 Hz  
F2PH 1.344 ppm  
F2H 672.52 Hz  
F1ILO 146.679 ppm  
F1IHO 18449.37 Hz  
F1PH 20.306 ppm  
F1H 2534.04 Hz  
F1PHCM 1.05968872 Hz/cm  
F1H2CM 8.42491 ppm/cm  
F1HZCM 1059.68872 Hz/cm

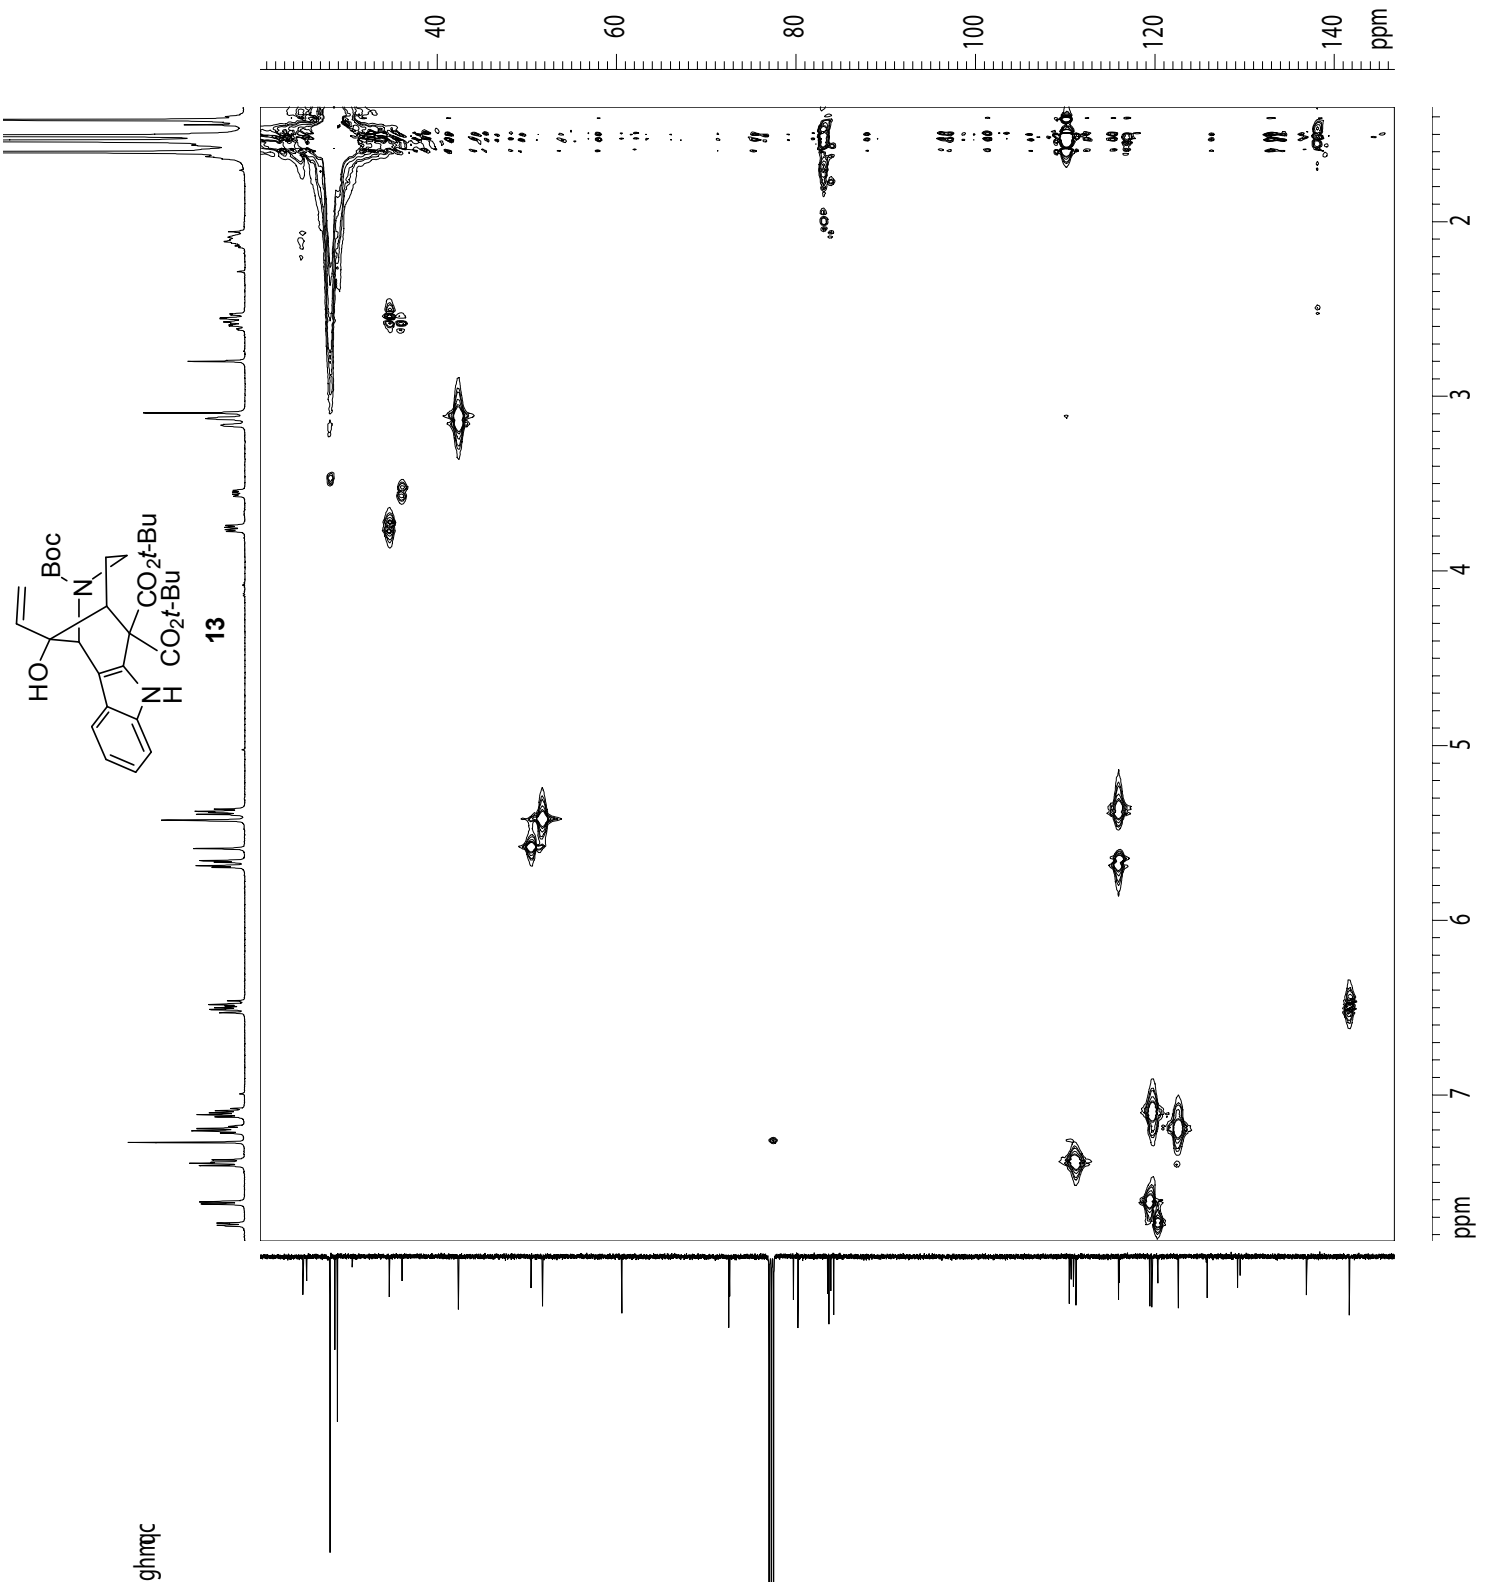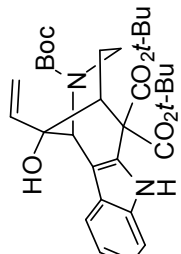

ghmrqc

Current Data Parameters  
USER Comor  
NAME CLIM 1-24382  
EXPNO 12  
PROCNO 1

F2 - Acquisition Parameters

Date\_ 20071008  
Time 15.28  
INSTRUM av600  
PROBHD 5 mm TBI 1H/13  
PULPROG cosygaf  
TD 1912  
SOLVENT CDCl3  
NS 1  
DS 16  
SWH 4795.396 Hz  
FIDRES 2.508053 Hz  
AQ 0.1994079 sec  
RG 90.5  
DW 104.267 usec  
DE 6.00 usec  
TE 298.0 K  
d0 0.00000300 sec  
d1 1.48689198 sec  
d13 0.00000400 sec  
d16 0.00020000 sec  
IND 0.00020830 sec

==== CHANNEL f1 =====  
NUC1 1H  
P0 8.00 usec  
PL1 8.00 usec  
PL2 -1.00 db  
SFO1 600.1329406 MHz

==== GRADIENT CHANNEL =====  
GPNAM1 SINE.100  
GPNAM2 SINE.100  
GPZ1 10.00 %  
GPZ2 10.00 %  
P16 1000.00 usec

F1 - Acquisition parameters  
ND0 256  
TD 600.1329 MHz  
SFO1 18.753000 Hz  
FIDRES 8.000 ppm  
F1WDW CF

F2 - Processing parameters  
SI 1024  
SF 600.1300267 MHz  
SINE  
VDW 0  
SSB 0  
LB 0.00 Hz  
GB 0  
PC 1.00

F1 - Processing parameters  
SI 1024  
MCZ CF  
SF 600.1300267 MHz  
SINE  
VDW 0  
SSB 0  
LB 0.00 Hz  
GB 0

2D NMR plot parameters  
CX1 15.00 cm  
CX2 15.00 cm  
F2PLO 8.590 ppm  
F2LO 5155.10 Hz  
F2PH 1.286 ppm  
F2H 771.80 Hz  
F1PLO 8.563 ppm  
F1LO 5138.86 Hz  
F1PH 1.298 ppm  
F1H 778.78 Hz  
F2PPMCM 0.48693 ppm/cm  
F2HZCM 292.21945 Hz/cm  
F1PPMCM 0.48435 ppm/cm  
F1HZCM 290.67151 Hz/cm

gcosy

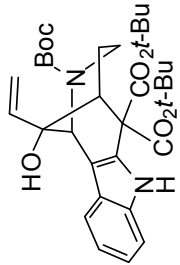

13

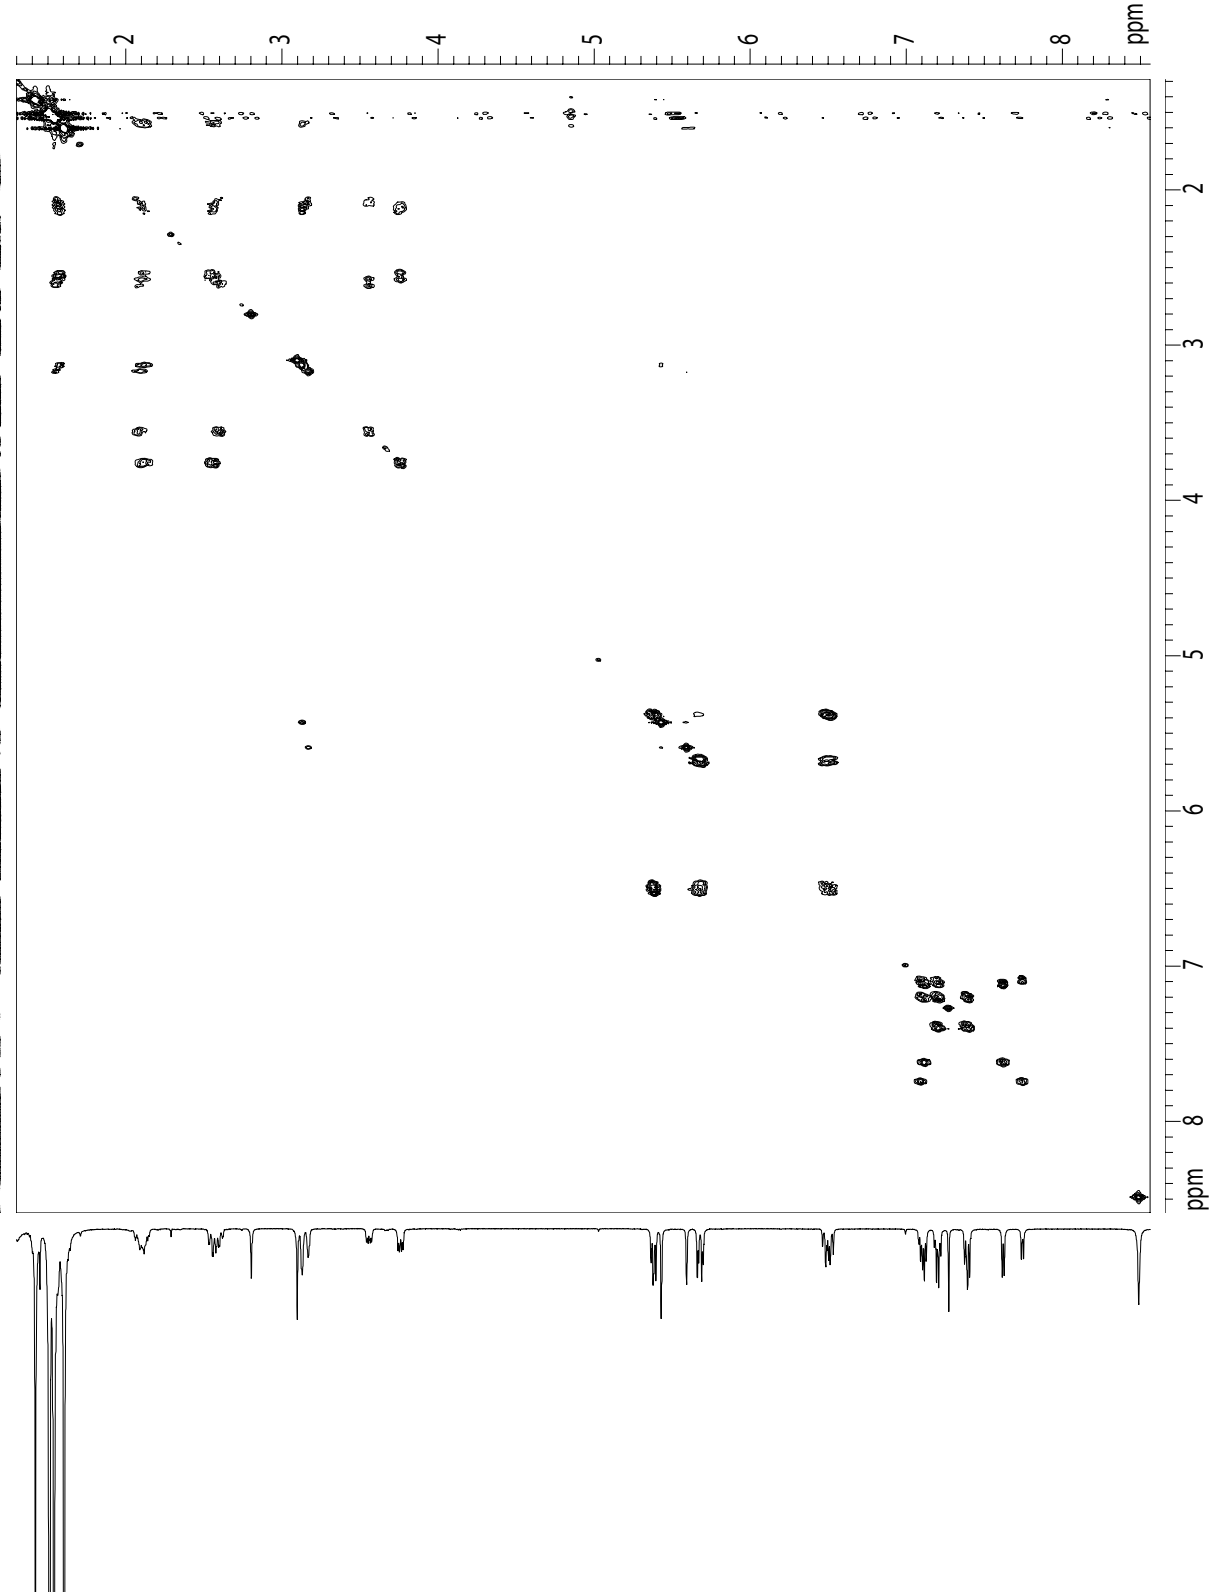

Current Data Parameters  
 USER: noesygp  
 NAME: CLM11-245B  
 EXPNO: 12  
 PROCNO: 1

F2 - Acquisition Parameters  
 Date\_: 20071005  
 Time: 21.06  
 INSTRUM: av600  
 PROBHD: 5 mm TBI 1H 13  
 PULPROG: noesygph  
 TD: 1912  
 SOLVENT: CDCl3  
 NS: 4  
 DS: 16  
 SWH: 4795.396 Hz  
 FIDRES: 2.508053 Hz  
 AQ: 0.1994079 sec  
 RG: 203  
 DW: 104.267 usec  
 DE: 6.00 usec  
 TE: 298.0 K  
 d0: 0.00009396 sec  
 D1: 2.00000000 sec  
 D8: 1.00000000 sec  
 D16: 0.00020000 sec  
 INO: 0.00020830 sec  
 STICNT: 128  
 TAU: 0.49880001 sec

F1 - Acquisition Parameters  
 NUC1: 1H  
 P1: 8.00 usec  
 P2: 16.00 usec  
 PL1: -1.00 dB  
 SFO1: 600.1330006 MHz

GRABENT CHANNEL  
 GPNAM1: SINE.100  
 GPNAM2: SINE.100  
 GZ1: 40.00 %  
 GZ2: -40.00 %  
 P16: 1000.00 usec

F2 - Processing parameters  
 SI: 1024  
 SF: 600.1300288 MHz  
 WDW: COSYNE  
 SSB: 2  
 LB: 0.00 Hz  
 GB: 0  
 PC: 1.00

F1 - Processing parameters  
 SI: 1024  
 IC2: States-TPII  
 SF: 600.1300288 MHz  
 WDW: COSYNE  
 SSB: 2  
 LB: 0.00 Hz  
 GB: 0

2D NMR plot parameters  
 OX: 15.00 cm  
 CX: 15.00 cm  
 F2PLO: 8.620 ppm  
 F2LO: 5172.83 Hz  
 F2PH: 1.152 ppm  
 F2HI: 691.20 Hz  
 F1PLO: 8.608 ppm  
 F1LO: 5165.92 Hz  
 F1PH: 1.171 ppm  
 F1HI: 702.71 Hz  
 F2PNCM: 0.49785 ppm/cm  
 F2HCN: 298.72567 Hz/cm  
 F1PNCM: 0.49581 ppm/cm  
 F1HCN: 297.54761 Hz/cm

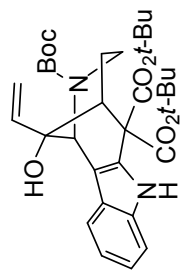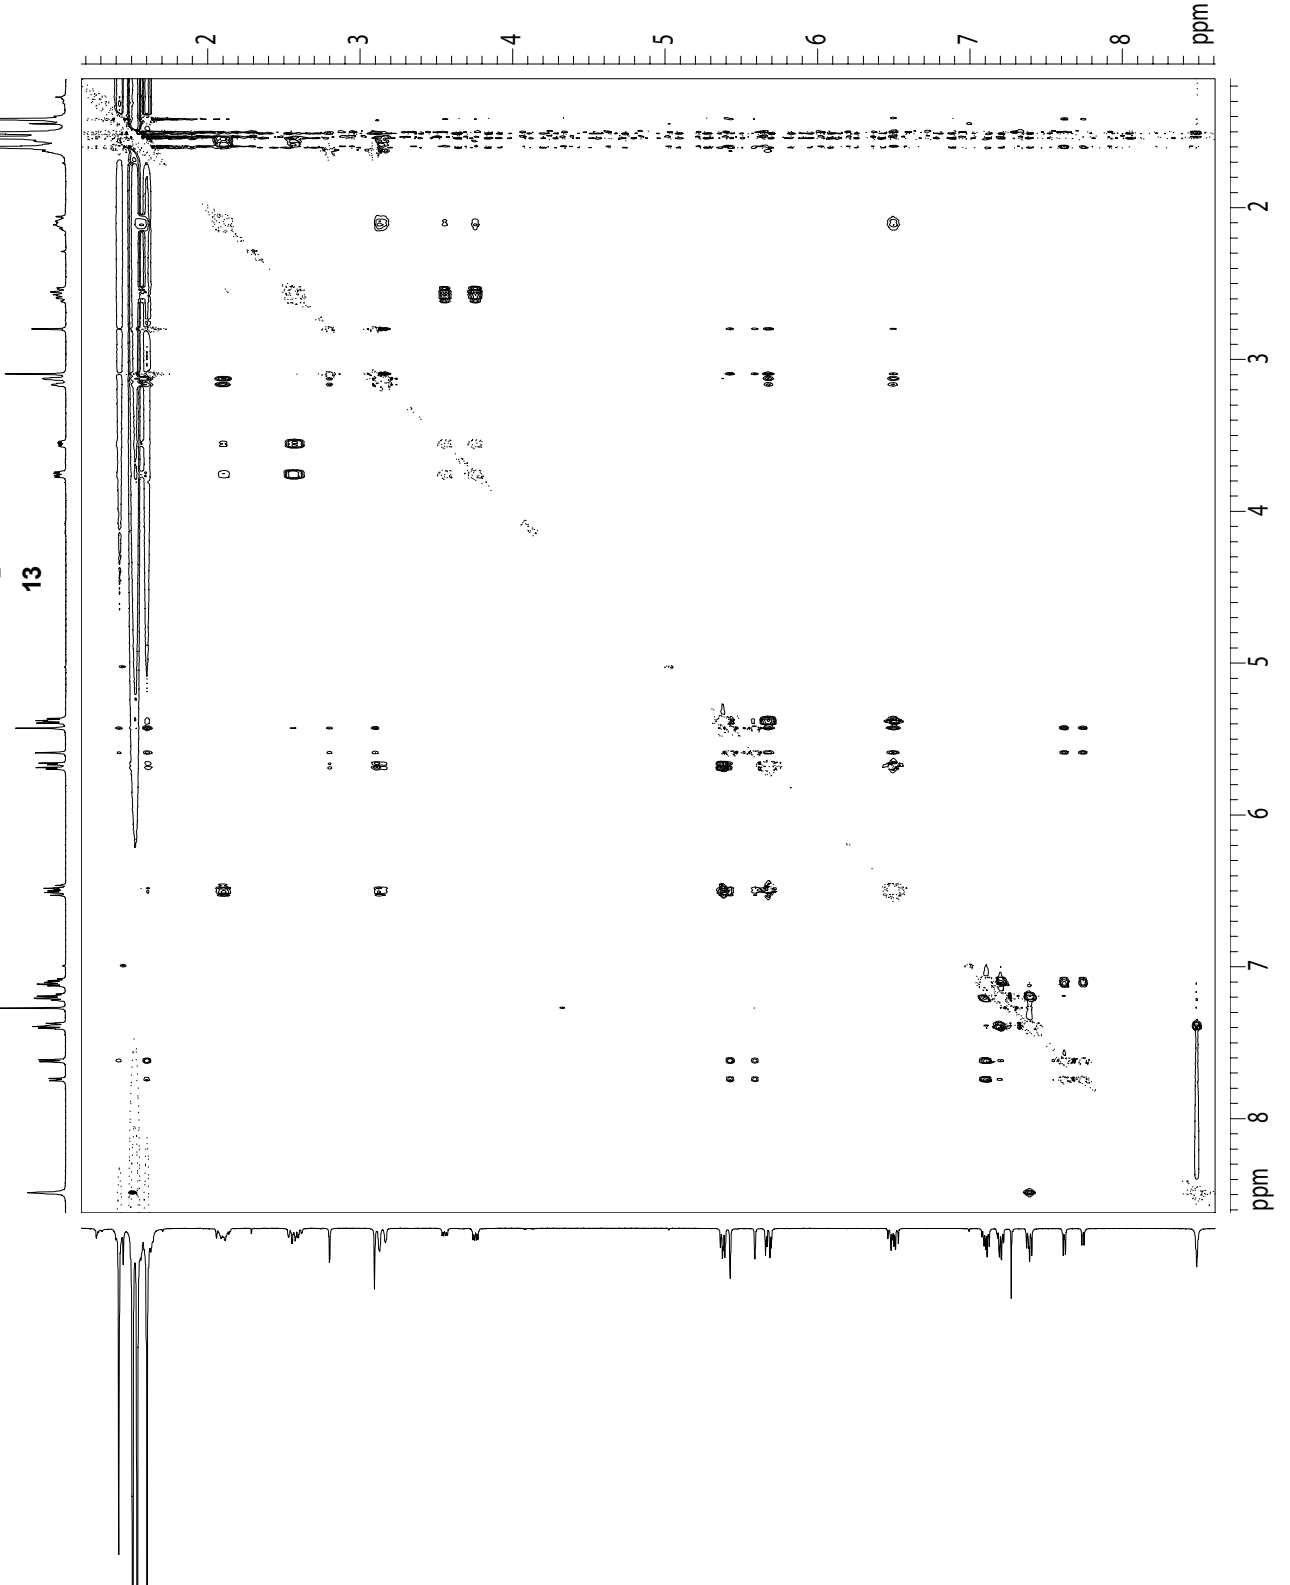

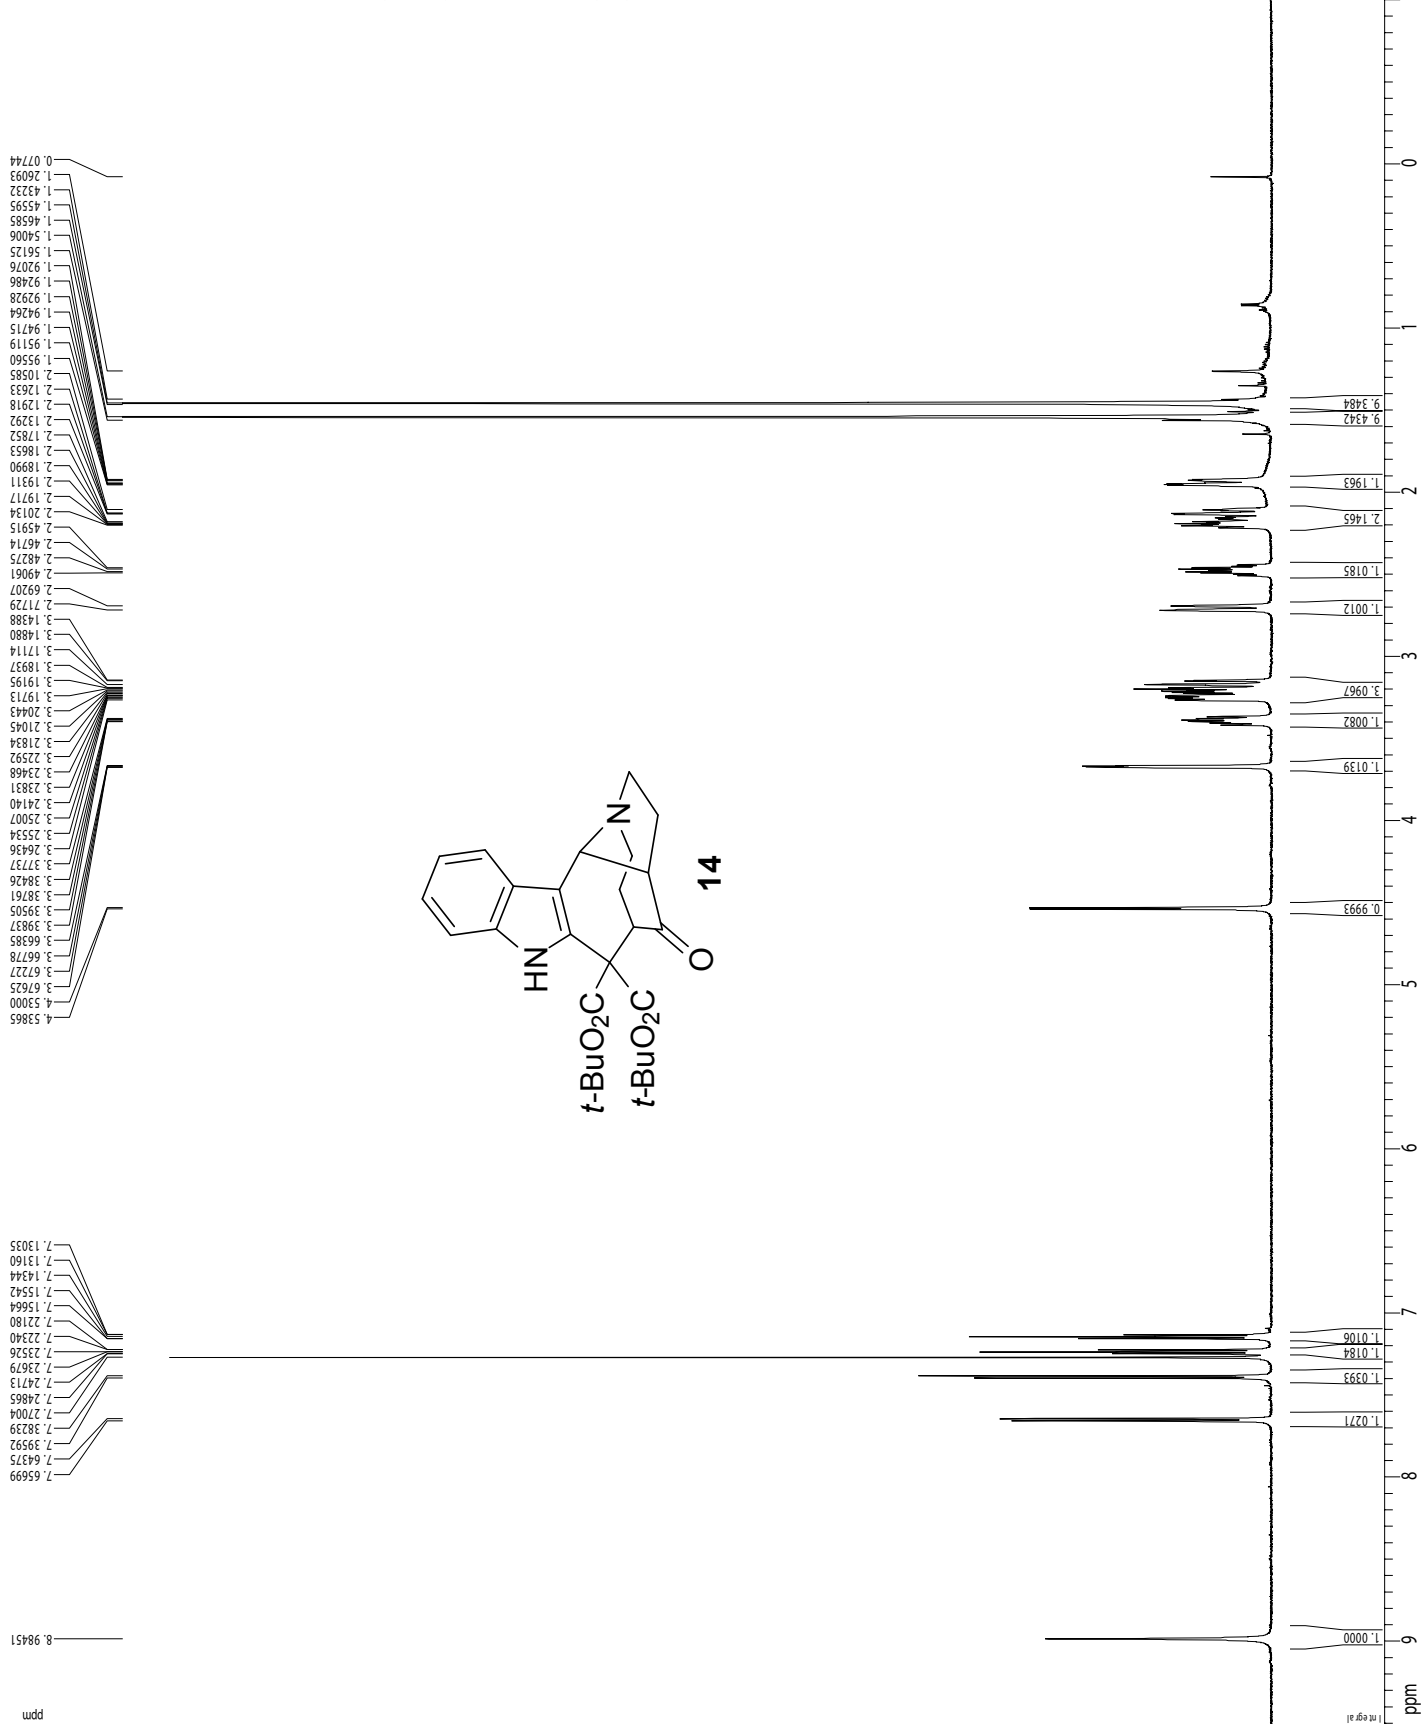

Current Data Parameters  
 USER conor  
 NAME di ester  
 EXPNO 11  
 PROCNO 1

F2 - Acquisition Parameters  
 Date\_ 20080420  
 Time 17.00  
 INSTRUM av600  
 PROBHD 5 mmTBI 1H/13  
 PULPROG zg30  
 ID 97938  
 SOLVENT CDCl3  
 NS 9  
 DS 2  
 SWH 9615.385 Hz  
 FIDRES 0.098178 Hz  
 AQ 5.0928259 sec  
 RG 228  
 DW 52.000 usec  
 DE 6.00 usec  
 TE 292.6 K  
 DT 0.10000000 sec  
 TD0 1

===== CHANNEL f1 =====  
 NUC1 1H  
 P1 8.00 usec  
 PL1 -1.00 dB  
 SFO1 600.1342009 MHz

F2 - Processing parameters  
 SI 65586  
 SF 600.1300293 MHz  
 WDW tukey  
 SSB 0  
 LB 0.00 Hz  
 GB 0  
 PC 1.00

1D NMR plot parameters  
 CX 22.80 cm  
 CY 99.11 cm  
 FIP 9.500 ppm  
 F1 5701.23 Hz  
 F2P -1.000 ppm  
 F2 -600.13 Hz  
 PPKCM 0.46053 ppm/cm  
 HZCM 276.37567 Hz/cm

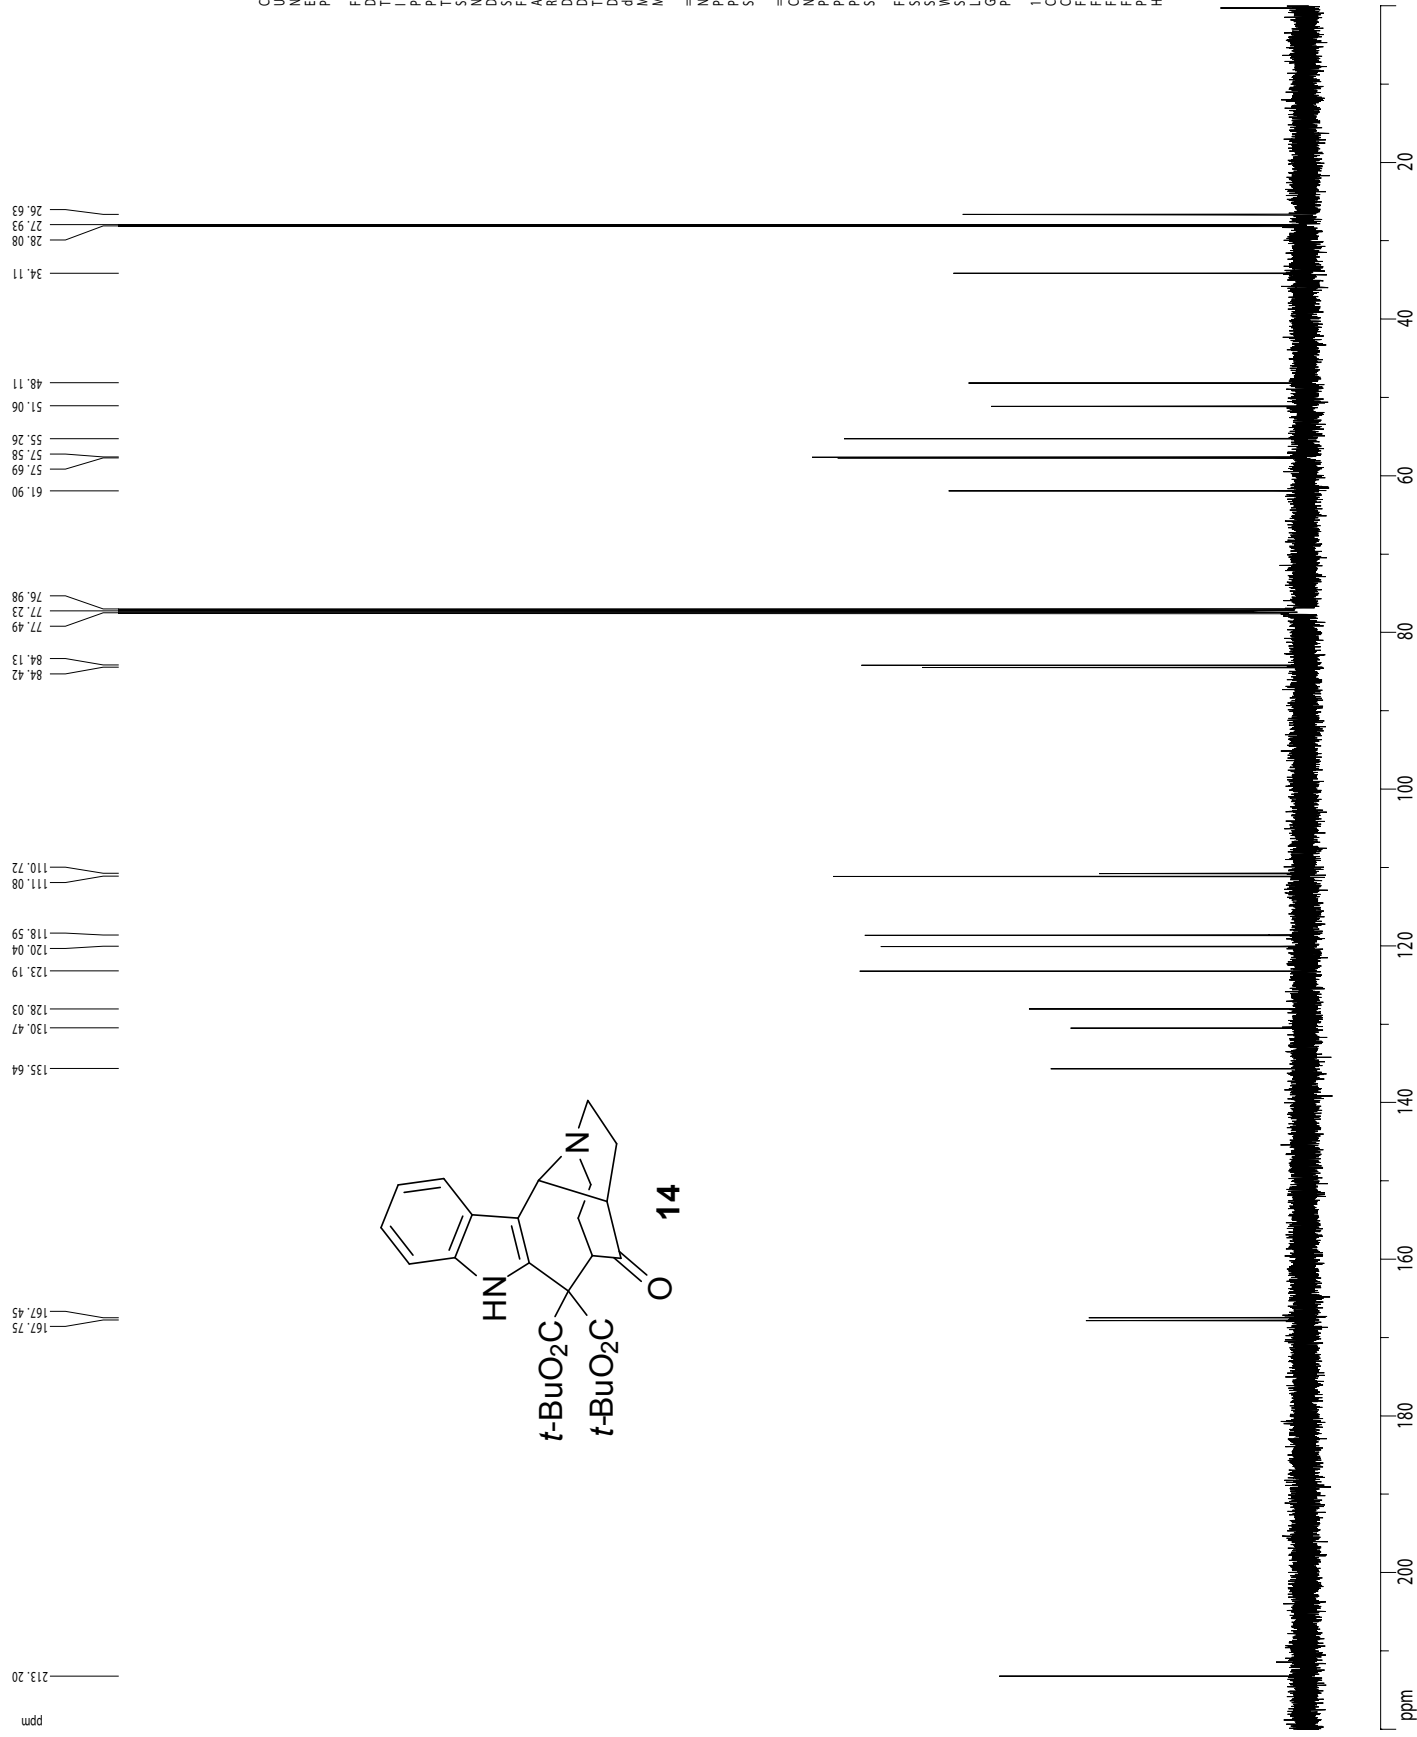

```

Current Data Parameters
USER      connor
NAME      CLM1-2648
EXPNO     5
PROCNO    1

F2 - Acquisition Parameters
Date_     20071109
Time      13.07
INSTRUM   cryo500
PROBHD    5 mmCPCL 1H
PULPROG   zgpg30
TD         65418
SOLVENT   CDCl3
NS         335
DS         4
SWH        30903.031 Hz
FIDRES     0.463222 Hz
AQ         1.07544470 sec
RG         11585.2
DW         16.500 usec
DE         6.00 usec
TE         298.0 K
d1         0.25000000 sec
d11        0.03000000 sec
d12        0.00000000 sec
d13        0.01500000 sec
ACQBRK    0.01500000 sec

===== CHANNEL f1 =====
NUC1       13C
P1         15.00 usec
PL1        -1.00 dB
SFO1       125.7942546 MHz

===== CHANNEL f2 =====
GPPPRG2   waltz16
NUC2       1H
PCPD2     100.00 usec
PL2        1.60 dB
PL12       23.54 dB
SFO2       500.2225011 MHz

F2 - Processing parameters
SI         65536
SF         125.7864002 MHz
WDW        no
SSB        0
LB         0.00 Hz
GB         0
PC         2.00

ID: NMR plot parameters
CV         272.80 cm
CY         31.85 cm
E1P        220.000 ppm
E1         27671.69 Hz
F2P        0.000 ppm
F2         0.00 Hz
PP4CM      9.64912 ppm/cm
HZCM       1213.67065 Hz/cm
    
```

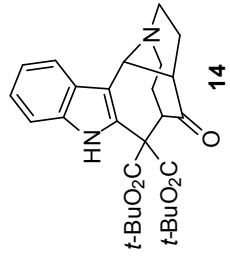

ghmrc

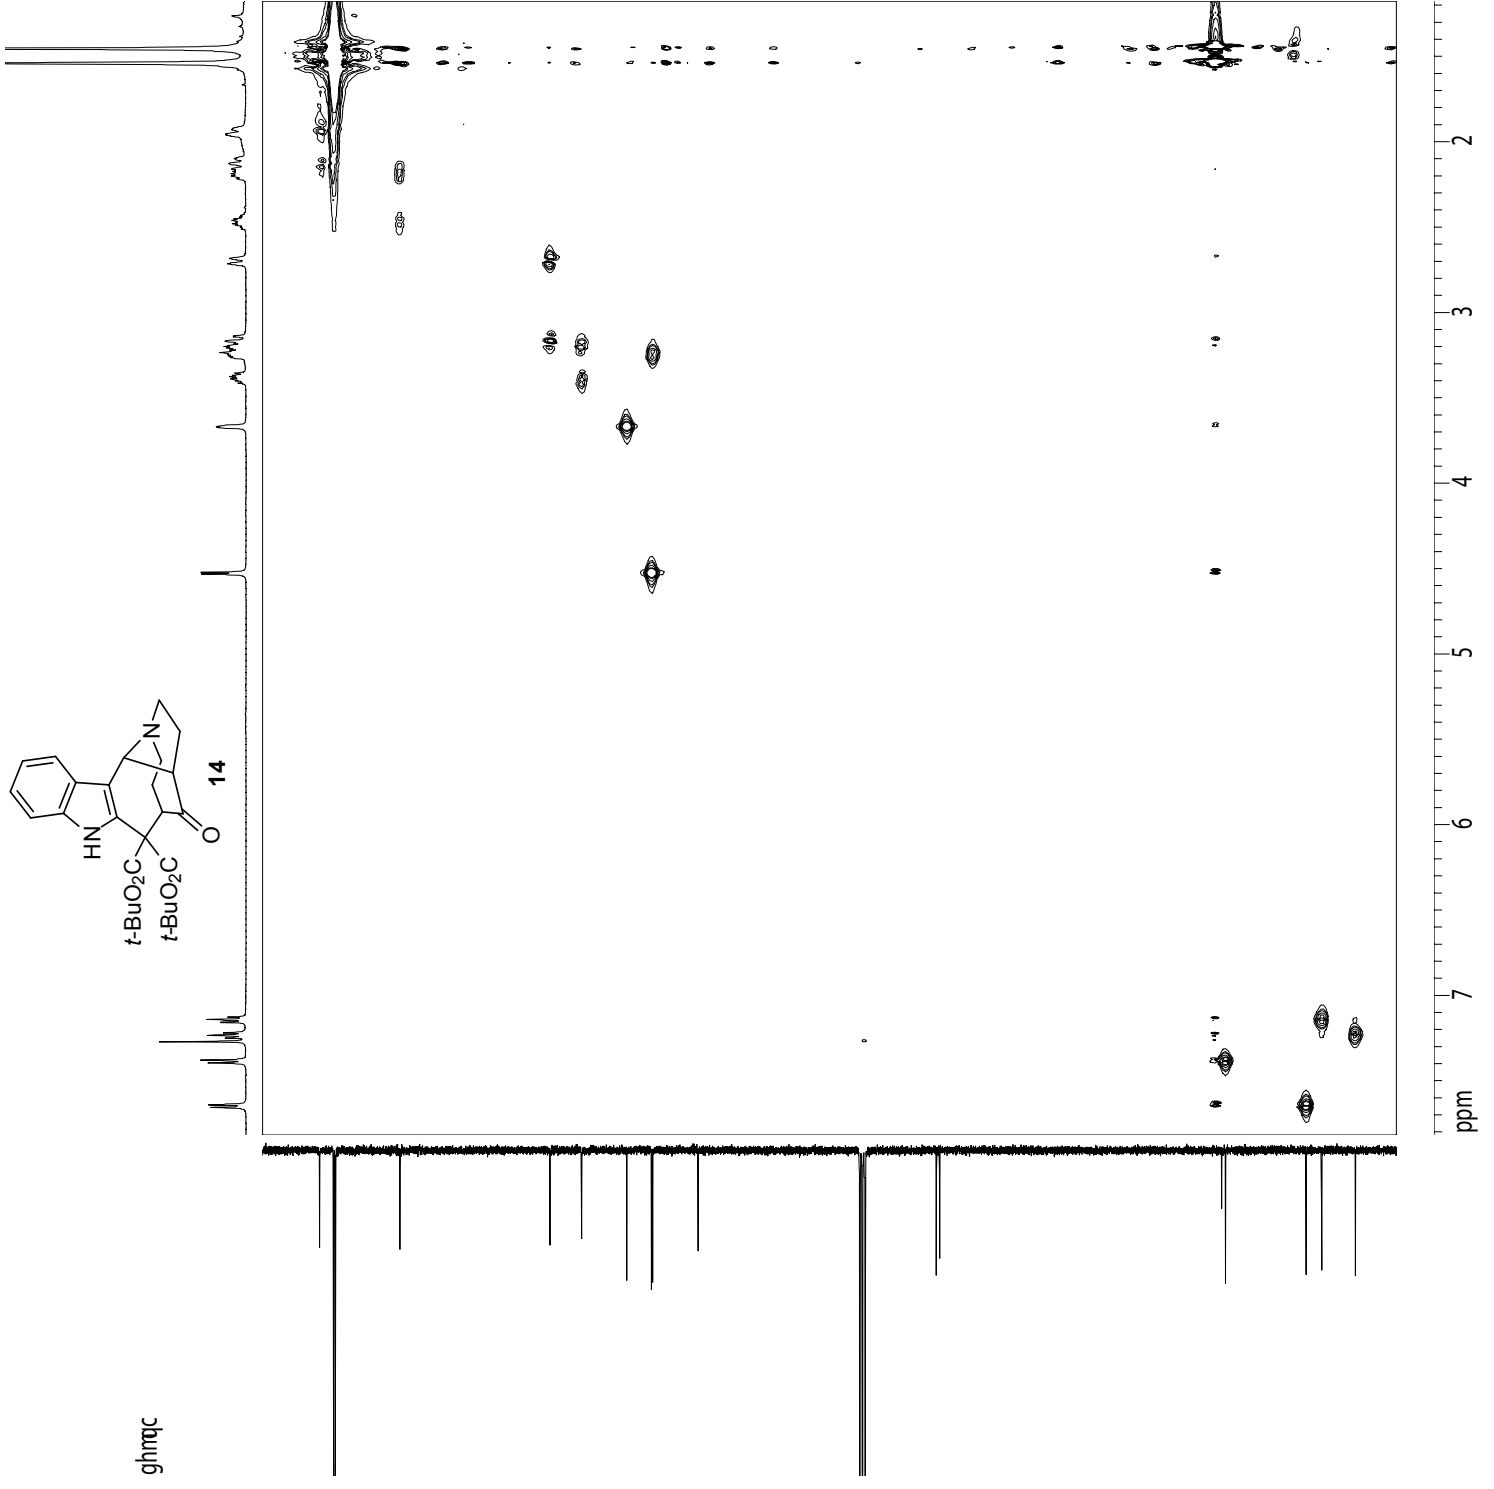

Current Data Parameters

USER comor  
 NAME CLM1-264B  
 EXPNO 3  
 PROCNO 1

F2 - Acquisition Parameters

Date\_ 20071109  
 Time 13.19  
 INSTRUM cryo500  
 PROBHD 5 mm CPTCI 1H  
 PULPROG invgpa.wu  
 TD 2048  
 SOLVENT CDCl3  
 DS 16  
 SWH 4194.631 Hz  
 FIDRES 2.948160 Hz  
 AQ 0.2441716 sec  
 RG 4096  
 DW 119.200 usec  
 DE 6.50 usec  
 TE 300.2 K  
 C1P2 145.000000 sec  
 d0 0.00000000 sec  
 d1 1.00000000 sec  
 d2 0.00344628 sec  
 d12 0.00002000 sec  
 d13 0.00000300 sec  
 D16 0.00020000 sec  
 d20 0.00422228 sec  
 INO 0.0001656 sec

===== CHANNEL f1 =====  
 NUC1 1H  
 P1 8.00 usec  
 P2 16.00 usec  
 PL1 1.60 dB  
 SFO1 500.226011 MHz

===== CHANNEL f2 =====  
 CPDPRG2 zgpg30  
 NUC2 13C  
 P3 15.00 usec  
 PCPD2 65.00 usec  
 PL2 -1.00 dB  
 PL12 11.80 dB  
 SFO2 125.7942548 MHz

===== GRAB F1F2 CHANNEL =====  
 GPMAR sine.100  
 GPMAR2 sine.100  
 GPMAR3 sine.100  
 GPX1 0.00 %  
 GPX2 0.00 %  
 GPX3 0.00 %  
 GPY1 0.00 %  
 GPY2 0.00 %  
 GPY3 0.00 %  
 GPZ1 30.00 %  
 GPZ2 18.00 %  
 GPZ3 24.00 %  
 P16 1000.00 usec

F1 - Acquisition parameters

NUC1 13C  
 Z 2  
 SFO1 125.7943 MHz  
 FIDRES 117.924630 Hz  
 SW 239.985 ppm  
 FMODE undefined

F2 - Processing parameters

SF 1024  
 SWH 500.2200260 MHz  
 FID 1H  
 SSB 0  
 LB 5.00 Hz  
 GB 0  
 PC 2.00

F1 - Processing parameters

SF 1024  
 SWH 125.7890002 MHz  
 FID 13C  
 SSB 3  
 LB 0.00 Hz  
 GB 0

2D NMR plot parameters

CX2 15.00 cm  
 CY2 15.00 cm  
 F2F0 7.818 ppm  
 F2F10 3910.57 Hz  
 F2PH 1.176 ppm  
 F2H 588.46 Hz  
 F1F0 127.026 ppm  
 F1LO 15977.34 Hz  
 F1PH 21.218 ppm  
 F1PC 2881.35 Hz  
 F1PRCM 1.00000000 ppm/cm  
 F2PC 221.47833 Hz/cm  
 F1PRCM 7.04220 ppm/cm  
 F1HZCM 886.39935 Hz/cm

Current Data Parameters  
USER: comor  
NAME: CLM1-2648  
EXPNO: 4  
PROCNO: 1

F2 - Acquisition Parameters  
Date\_: 20071109  
Time: 13.25  
INSTRUM: cryos500  
PROBHD: 5 mm CPTC 1H  
PULPROG: cosygp  
TD: 2048  
SOLVENT: CDCl3  
NS: 1  
DS: 16

SWH: 4194.631 Hz  
FIDRES: 2.048160 Hz  
AQ: 0.2441716 sec  
RG: 35.9  
DW: 119.200 usec  
DE: 6.00 usec  
TE: 298.0 K  
D0: 0.0000300 sec  
D1: 1.0000000 sec  
D13: 0.0000500 sec  
D16: 0.0002000 sec  
TNO: 0.00023799 sec

==== CHANNEL f1 =====  
NUC1: 1H  
P0: 8.00 usec  
PL1: 8.00 usec  
PL2: 1.60 dB  
SFO1: 500.2226011 MHz

==== GRADIENT CHANNEL =====  
GPMV1: sine, 100  
GPMV2: sine, 100  
GPX1: 0.00 %  
GPX2: 0.00 %  
GPY1: 0.00 %  
GPY2: 0.00 %  
GPZ1: 17.00 %  
GPZ2: 17.00 %  
PI6: 1000.00 usec

F1 - Acquisition parameters  
ND0: 170  
TD: 1  
SFO1: 500.2226 MHz  
FIDRES: 24.717068 Hz  
SW: 8.400 ppm  
FMODE: undefined

F2 - Processing parameters  
SI: 1024  
SF: 500.2200260 MHz  
WDW: SINE  
SSB: 0  
LB: 0.00 Hz  
GB: 0  
PC: 1.40

F1 - Processing parameters  
SI: 1024  
MC2: CF  
SF: 500.2200260 MHz  
WDW: SINE  
SSB: 0  
LB: 0.00 Hz  
GB: 0

2D NMR plot parameters  
CQ: 15.00 cm  
CX: 15.00 cm  
F2PLO: 9.095 ppm  
F2LO: 4549.60 Hz  
F2PH: 1.324 ppm  
F2HI: 662.19 Hz  
F1PLO: 9.118 ppm  
F1LO: 4561.23 Hz  
F1PH: 1.276 ppm  
F1HI: 638.26 Hz  
F2PPHOM: 0.51809 ppm/cm  
F2PCOM: 259.16046 Hz/cm  
F1PPHOM: 0.52282 ppm/cm  
F1PCOM: 261.52460 Hz/cm

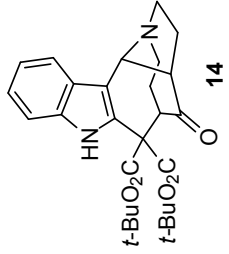

gcossy

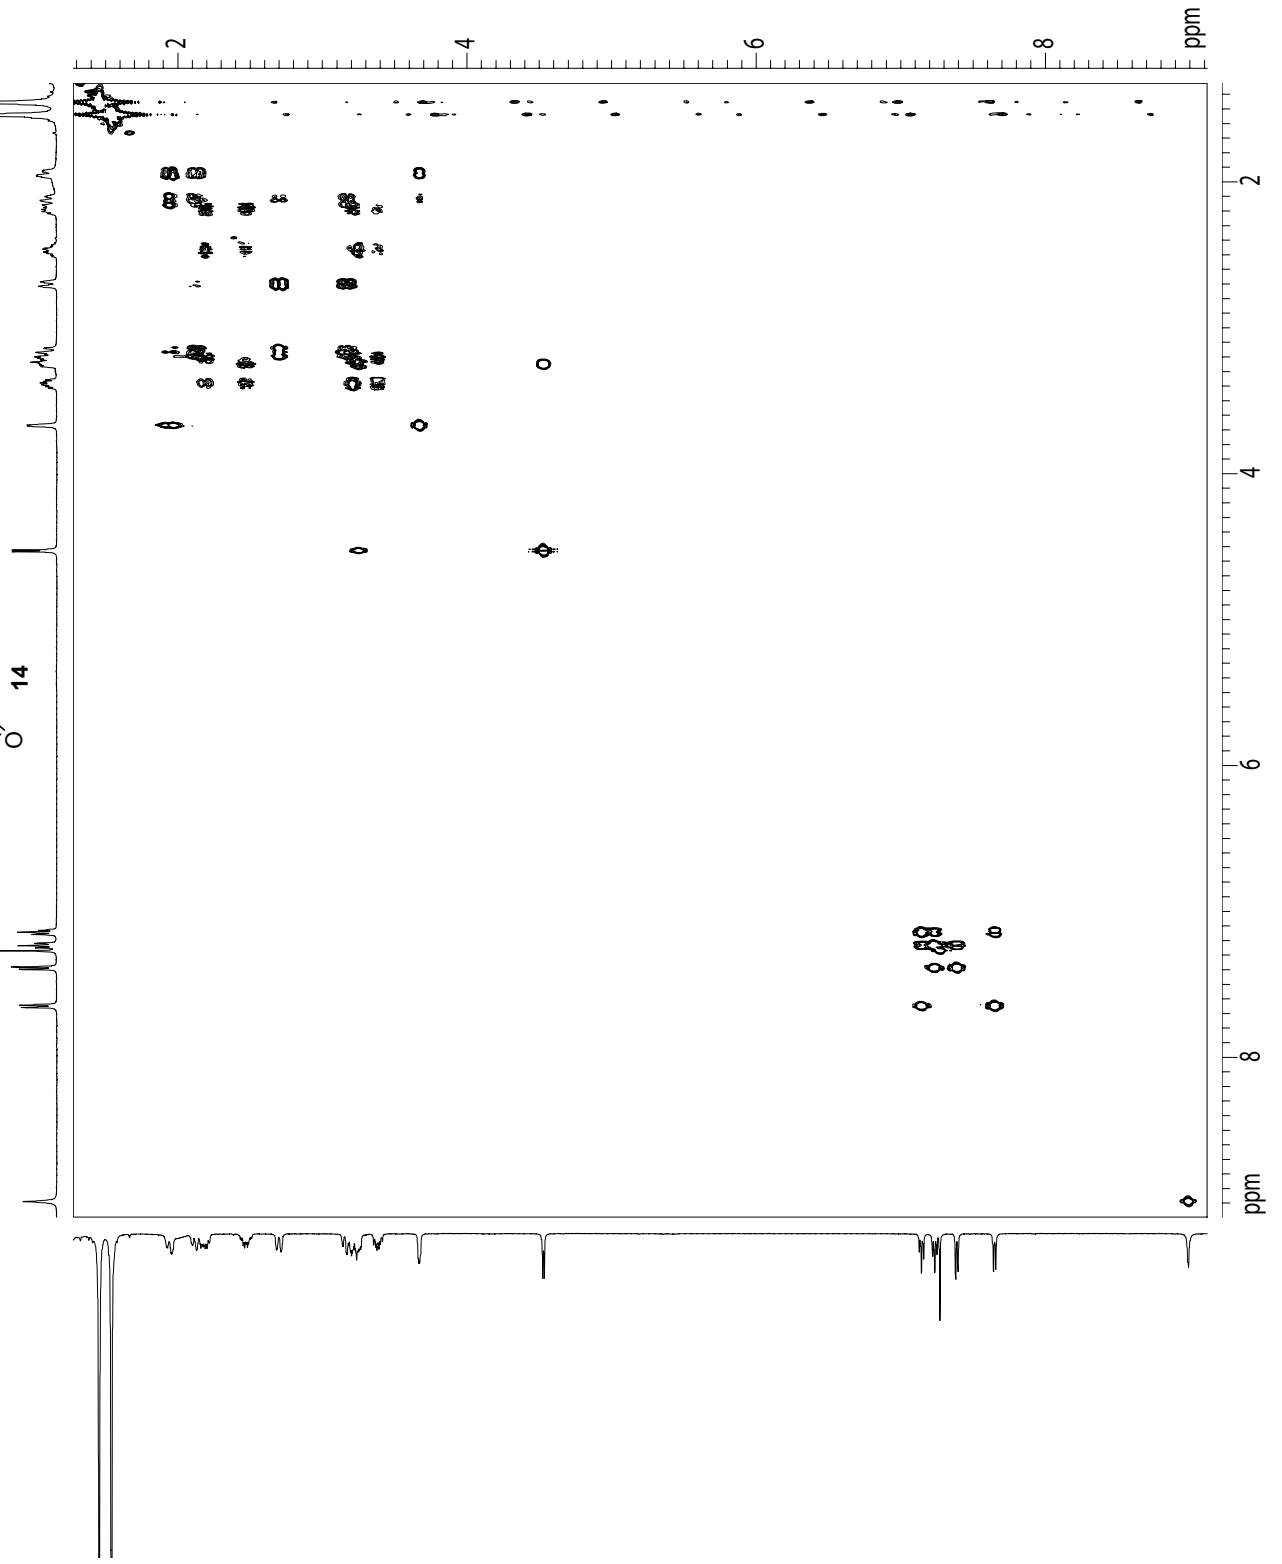

USER comor  
 NAME CLM1-2648  
 EXPNO 17  
 PROCNO 1

F2 - Acquisition Parameters

Date\_ 20071109  
 Time 14.08  
 INSTRUM av600  
 PULPROG zgpg30  
 TD 65536  
 SOLVENT CDCl3  
 NS 2  
 DS 16  
 SWH 5040.323 Hz  
 FIDRES 5.676039 Hz  
 AQ 0.0881396 sec  
 RG 2050  
 DW 99.200 usec  
 DE 6.00 usec  
 TE 298.0 K  
 CHST2 145.0000000  
 d0 10.0000000  
 d1 0.00000300 sec  
 d2 1.10000002 sec  
 d6 0.00344628 sec  
 d8 0.05000000 sec  
 d16 0.00000300 sec  
 d18 0.00001300 sec

CHANNEL f1

NUC1 1H  
 P1 8.00 usec  
 P2 16.00 usec  
 PL1 -1.00 dB  
 SFO1 600.1331207 MHz

CHANNEL f2

NUC2 13C  
 P3 15.00 usec  
 PL2 -1.00 dB  
 SFO2 150.9194083 MHz

GRABENT CHANNEL

GRAB1 SINE 100  
 GRAB2 SINE 100  
 GRAB6 SINE 100  
 GP1 50.00 %  
 GP2 30.00 %  
 GP3 40.10 %  
 P16 1000.00 usec

F1 - Acquisition parameters

ND0 2  
 TD 512  
 SFO1 150.9194 MHz  
 FIDRES 70.765396 Hz  
 SW 240.074 ppm  
 FMODE CF

F2 - Processing parameters

SI 1024  
 SF 600.1300260 MHz  
 SINC SINC  
 LB 0.00 Hz  
 GB 0  
 PC 1.00

F1 - Processing parameters

SI 1024  
 CF CF  
 SF 150.9027901 MHz  
 SINC SINC  
 SSB 0  
 LB 0.00 Hz  
 GB 0

2D MMR plot parameters

CZ 18.00 cm  
 F2H0 15.00 cm  
 F2H1 5457.96 Hz  
 F2PH 1.320 ppm  
 F2H 732.05 Hz  
 F1P0 215.872 ppm  
 F1H 32575.75 Hz  
 F1PH 25.011 ppm  
 F1H 3774.23 Hz  
 F2PPMCM 0.43743 ppm/cm  
 F2HZCM 262.51678 Hz/cm  
 F1PPMCM 12.72409 ppm/cm  
 F1HZCM 1920.10107 Hz/cm

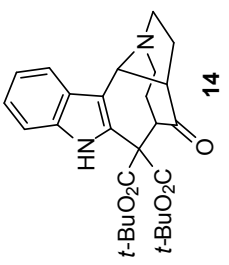

ghnbc optimized for 10Hz couplings

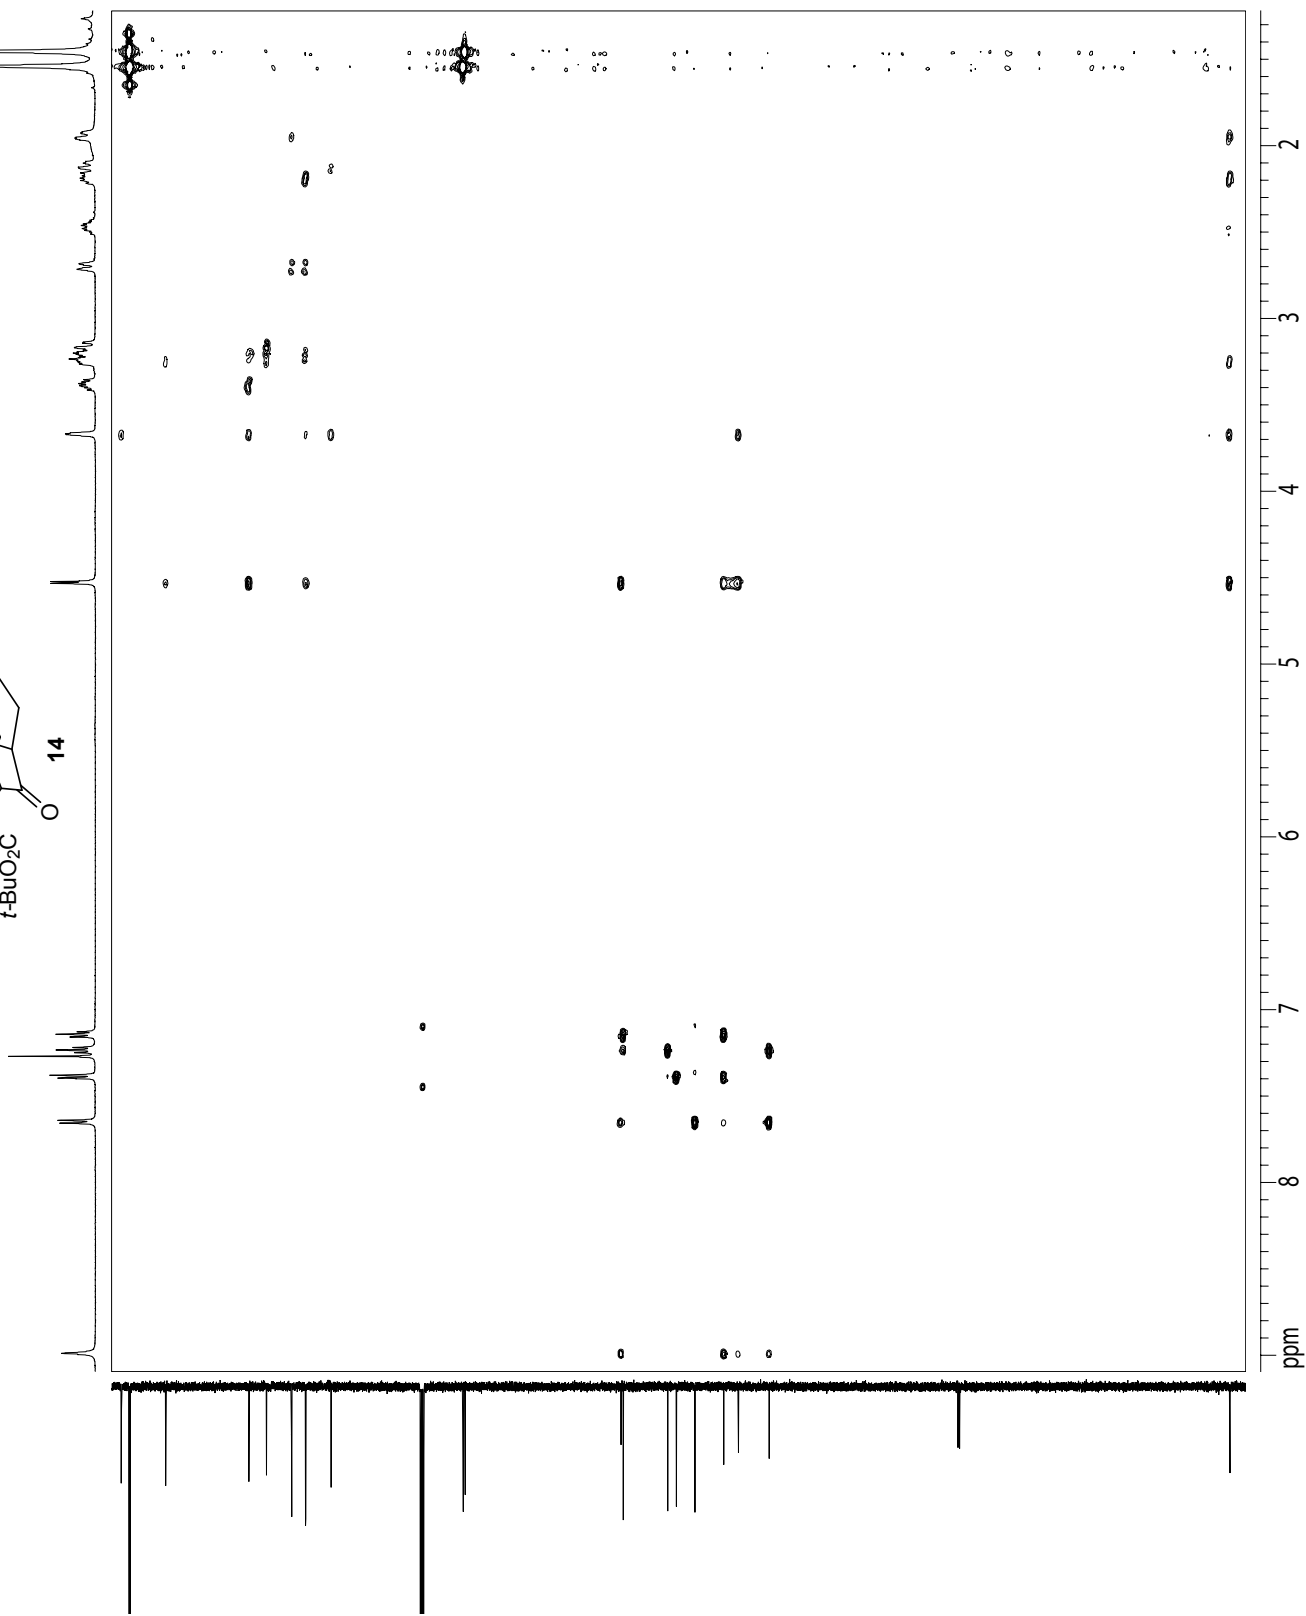



<sup>1</sup>H spectrum

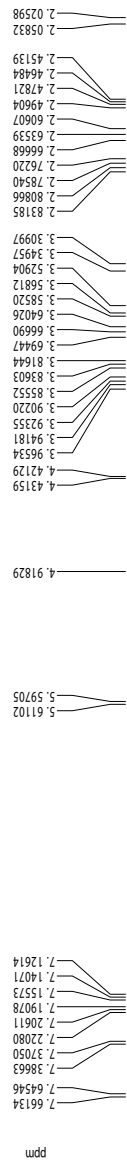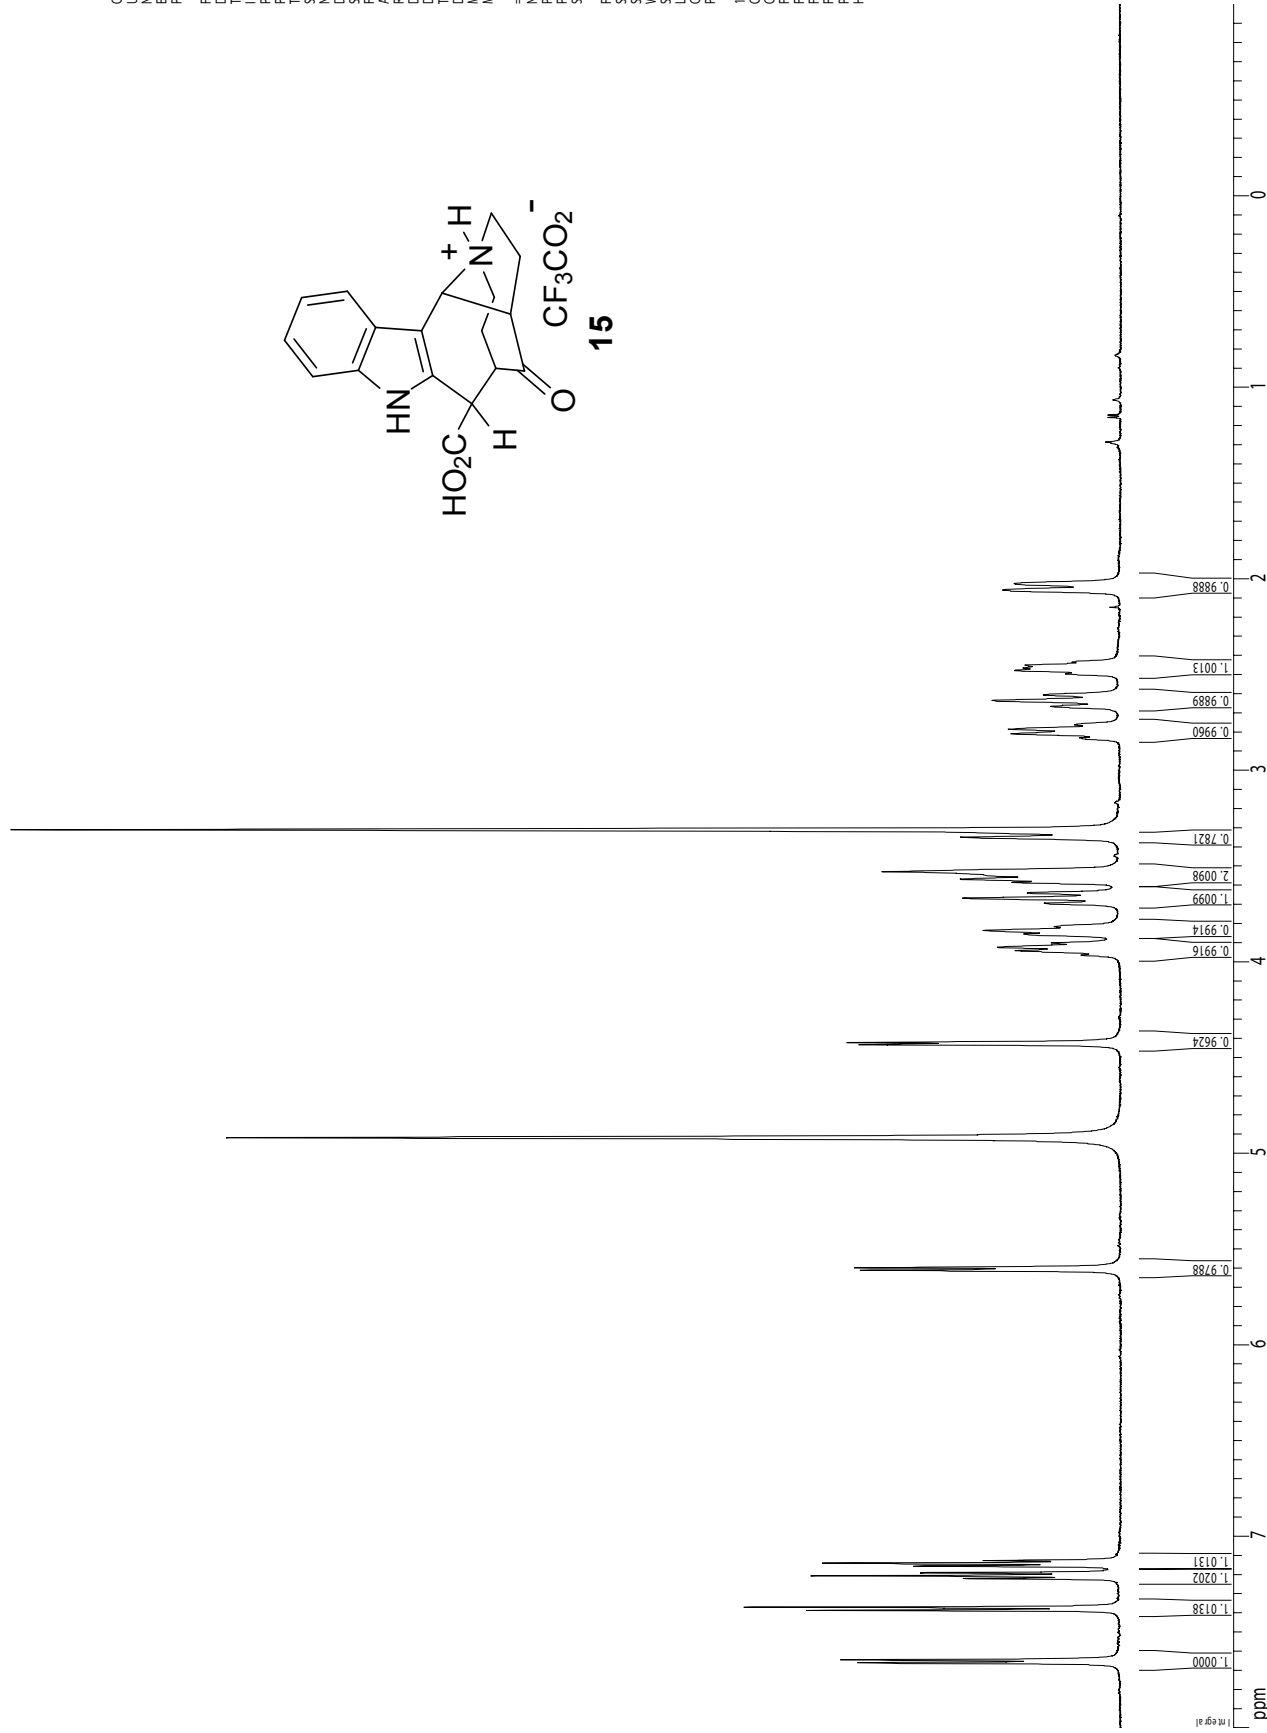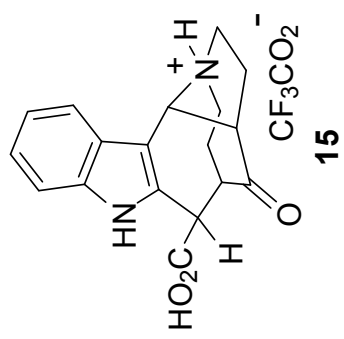

Current Data Parameters  
 USER: comor  
 NAME: CLM-2-47D  
 EXPNO: 1  
 PROCNO: 1

F2 - Acquisition Parameters  
 Date\_: 20080315  
 Time: 18.23  
 INSTRUM: cryos00  
 PROBRD: 5 mmCPCLP1H  
 PULPROG: zgpg30  
 TD: 8728  
 SOLVENT: CD3OD  
 NS: 8  
 DS: 2  
 SWH: 8012.820 Hz  
 FIDRES: 0.098043 Hz  
 AQ: 5.0988774 sec  
 RG: 11.3  
 DW: 62.400 usec  
 DE: 6.00 usec  
 TE: 298.0 K  
 DL: 0.1000000 sec  
 ACQST: 0.0000000 sec  
 MCWK: 0.01500000 sec

===== CHANNEL f1 =====  
 NUC1: 1H  
 P1: 7.38 usec  
 PL1: 1.60 dB  
 SFO1: 500.2235015 MHz

F2 - Processing parameters  
 SI: 65536  
 SF: 500.2200182 MHz  
 WDW: no  
 SSB: 0.00 Hz  
 GB: 0.00 Hz  
 PC: 4.00

ID NAME pl ot parameter  
 CX: 22.80 cm  
 CY: 14.68 cm  
 F1P: 8.000 ppm  
 F1: 4001.76 Hz  
 F2P: -1.000 ppm  
 F2: -500.22 Hz  
 PPRCM: 0.39474 ppm/cm  
 HZCM: 197.45528 Hz/cm

<sup>13</sup>C spectrum with <sup>1</sup>H decoupling

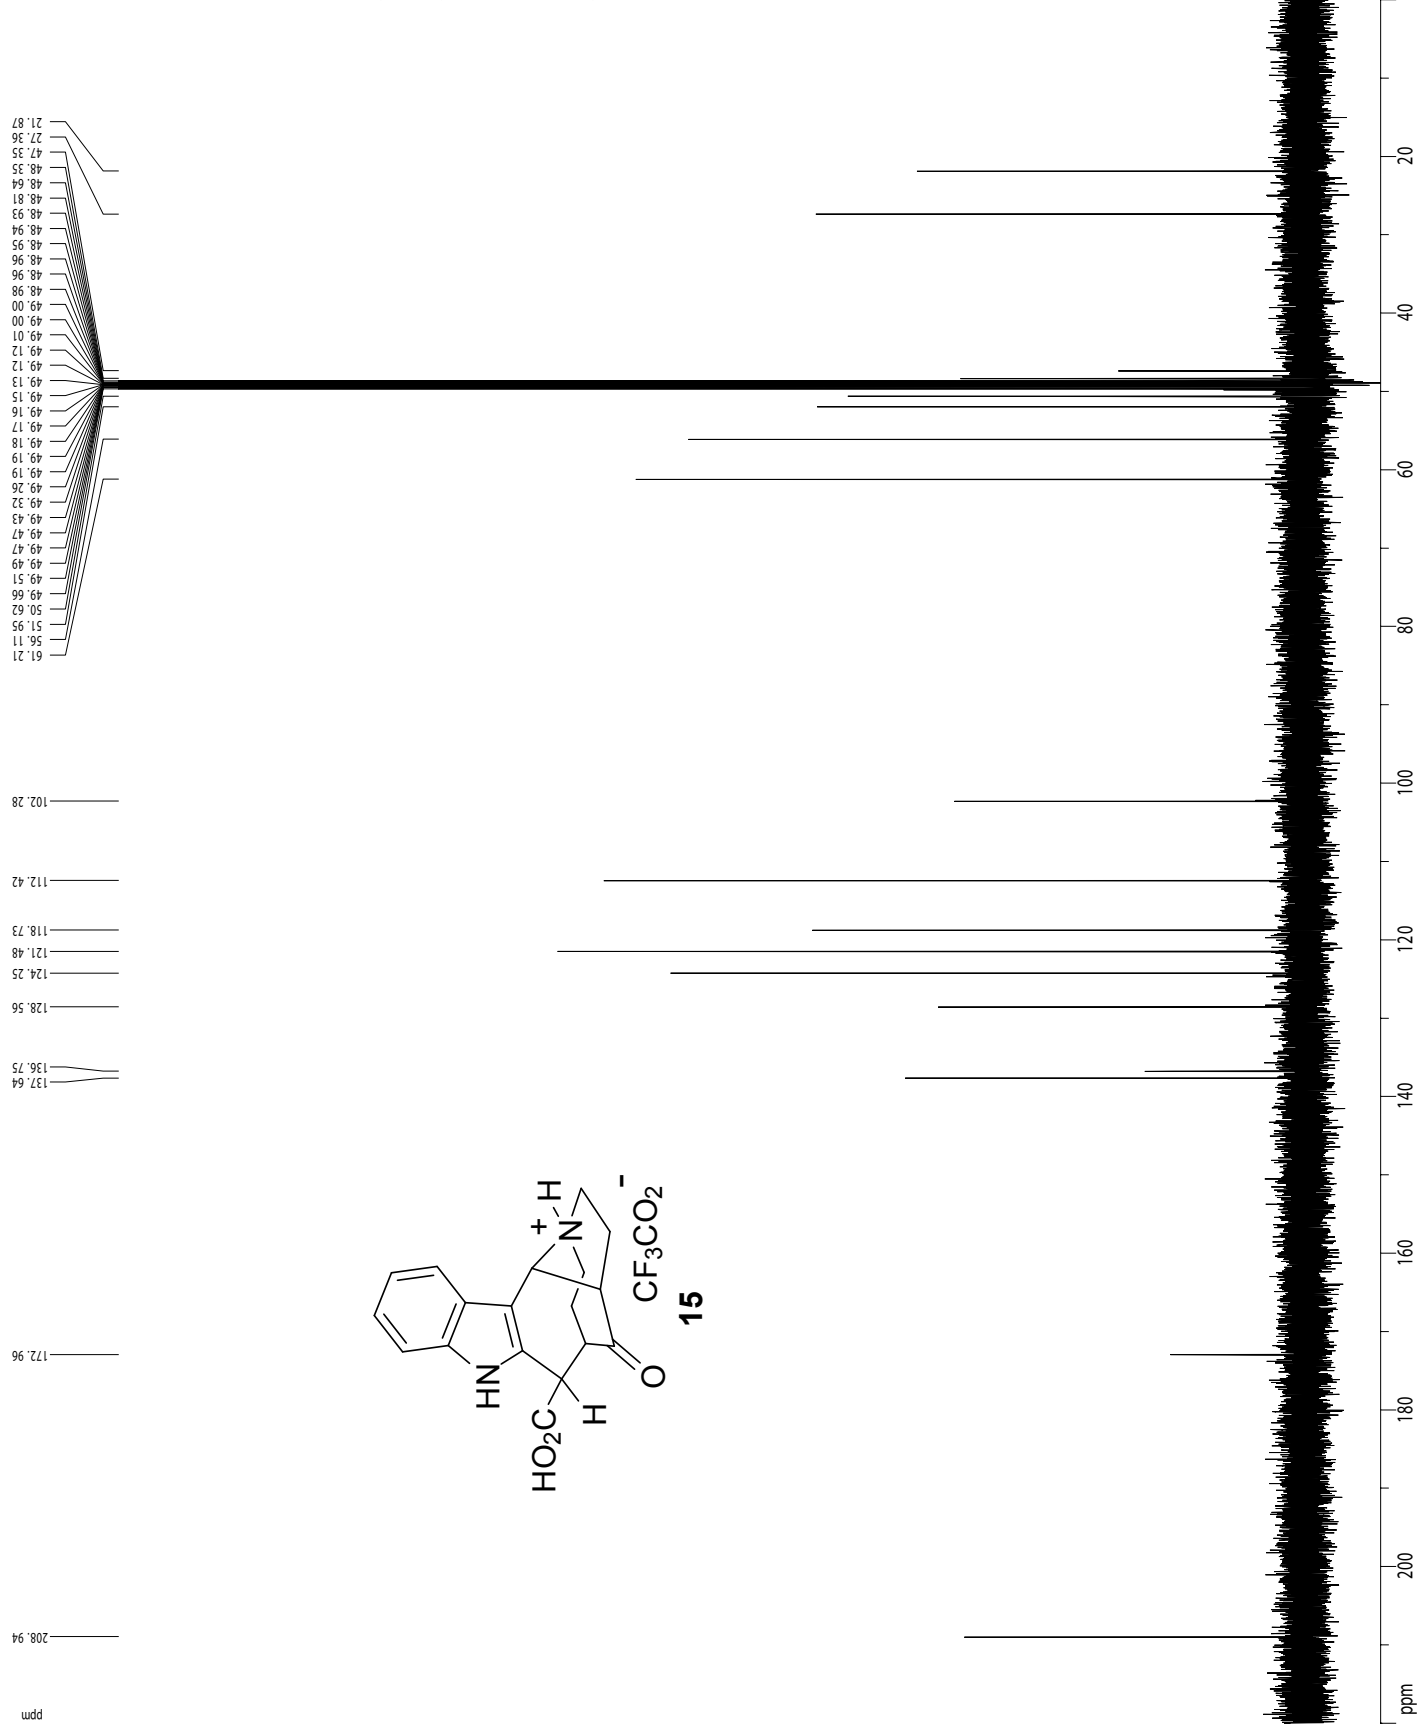

Current Data Parameters  
 USER conor  
 NAME CLM 2-47D  
 EXPNO 5  
 PROCNO 1

F2 - Acquisition Parameters  
 Date\_ 20080315  
 Time 18.26  
 INSTRUM cryo500  
 PROBHD 5 mm CPTCL 1H  
 PULPROG zgpg30  
 TD 65418  
 SOLVENT CDCl3  
 NS 163  
 SWH 30903.091 Hz  
 FIDRES 0.463222 Hz  
 AQ 1.0794470 sec  
 RG 7298.2  
 DW 16.500 usec  
 DE 6.00 usec  
 TE 298.0 K  
 d1 2.0000000 sec  
 d11 0.0300000 sec  
 ACREST 0.0000000 sec  
 ACYBK 0.0150000 sec

==== CHANNEL f1 =====  
 NUC1 <sup>13</sup>C  
 P1 14.75 usec  
 PL1 -1.00 dB  
 SFO1 125.7942546 MHz

==== CHANNEL f2 =====  
 CDPORG waltz16  
 NUC2 <sup>1</sup>H  
 PCPD2 100.00 usec  
 PL2 1.60 dB  
 PL12 24.80 dB  
 SFO2 500.2225011 MHz

F2 - Processing parameters  
 SI 65536  
 SF 125.7802279 MHz  
 WDW no  
 SSB 0  
 LB 0.00 Hz  
 GB 0  
 PC 2.00

ID NMR plot parameters  
 CV 321.80 cm  
 CY 339.84 cm  
 F1P 220.000 ppm  
 F1 27671.65 Hz  
 F2P 0.000 ppm  
 F2 0.00 Hz  
 PPA1M 9.64912 ppm/cm  
 HZCM 1213.66895 Hz/cm

Current Data Parameters

USER comor  
NAME CLM2-47D  
EXPNO 3  
PROCNO 1

F2 - Acquisition Parameters

Date\_ 20080315  
Time 18.35  
INSTRUM cryo500  
PROBHD 5 mm CPTCI TH  
PULPROG invwga.wu  
TD 2048  
SOLVENT CDCl3  
DS 16  
SWH 3901.401 Hz  
FIDRES 1.709668 Hz  
AQ 0.2925044 sec  
RG 11586.2  
DW 142.800 usec  
DE 6.50 usec  
TE 300.2 K  
CNS172 145.000000 sec  
d0 0.00000000 sec  
d1 0.00000000 sec  
d2 0.00344828 sec  
d12 0.00002000 sec  
d13 0.00000000 sec  
d16 0.00020000 sec  
d20 0.0042228 sec  
f1n0 0.0001656 sec

CHANNEL f1

NUC1 H  
P1 7.38 usec  
P2 14.75 usec  
PL1 1.60 dB  
SFO1 500.2225011 MHz

CHANNEL f2

CPDPRG2 zgpg30  
NUC2 13C  
P3 14.75 usec  
PCPD2 65.00 usec  
PL2 -1.00 dB  
PL12 11.80 dB  
SFO2 125.7942548 MHz

GRAB F1 CHANNEL

GPWAB sine.100  
GPWAB sine.100  
GPX1 0.00 %  
GPX2 0.00 %  
GPX3 0.00 %  
GPY1 0.00 %  
GPY2 0.00 %  
GPY3 0.00 %  
GPZ1 30.00 %  
GPZ2 18.00 %  
GPZ3 24.00 %  
P16 1000.00 usec

F1 - Acquisition parameters

ND0 2  
TE 300.2  
SFO1 125.7943 MHz  
FIDRES 117.924630 Hz  
SIFW 239.985 ppm  
F1MODE undefined

F2 - Processing parameters

SF 1024  
SIFW 500.2200932 MHz  
AQ 1.00000000 sec  
SFR 0  
LB 5.00 Hz  
GB 0  
PC 2.00

F1 - Processing parameters

SF 1024  
SIFW 125.7802729 MHz  
AQ 1.00000000 sec  
SFR 3  
LB 0.00 Hz  
GB 0

2D NMR plot parameters

CX2 15.00 cm  
CY2 15.00 cm  
F2P10 7.862 ppm  
F2L10 3947.72 Hz  
F2PH 1.863 ppm  
F2H 931.86 Hz  
F1P10 128.630 ppm  
F1LO 16179.08 Hz  
F1PH 16.339 ppm  
F1H 20376.61 Hz  
F1P10CM 128.630 ppm/cm  
F2H2CM 7.862 ppm/cm  
F1P10CM 7.48873 ppm/cm  
F1H2CM 941.43079 Hz/cm

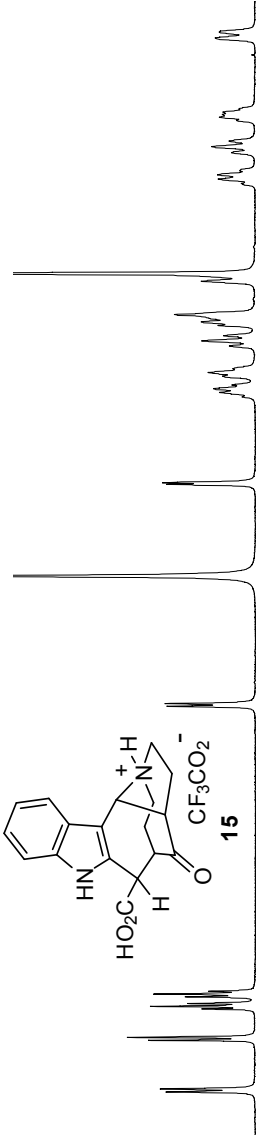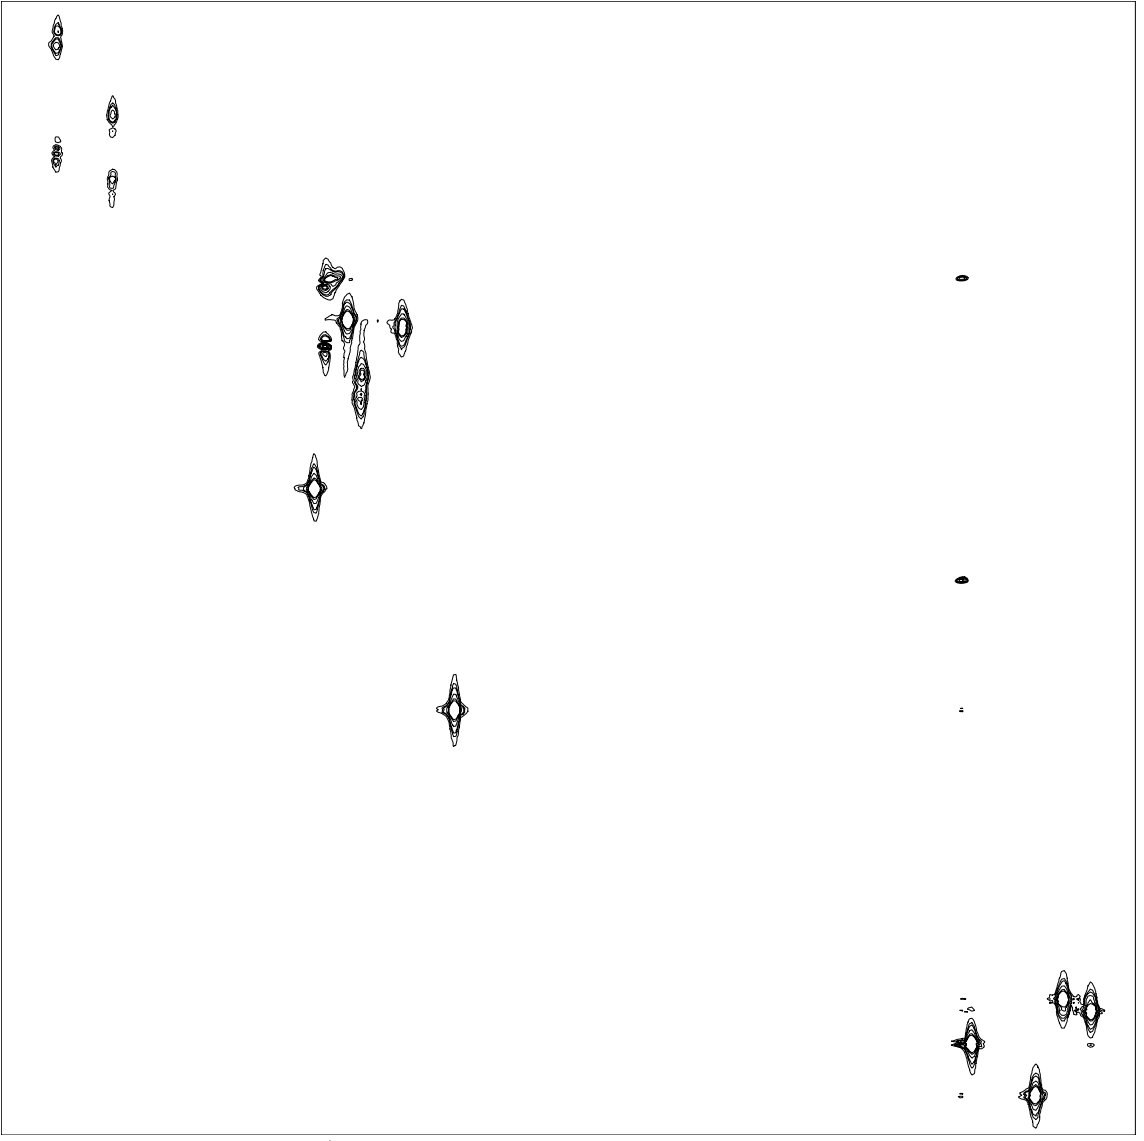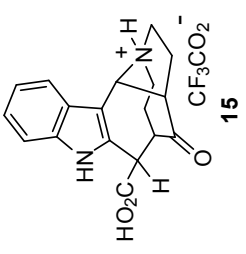

ghmrc

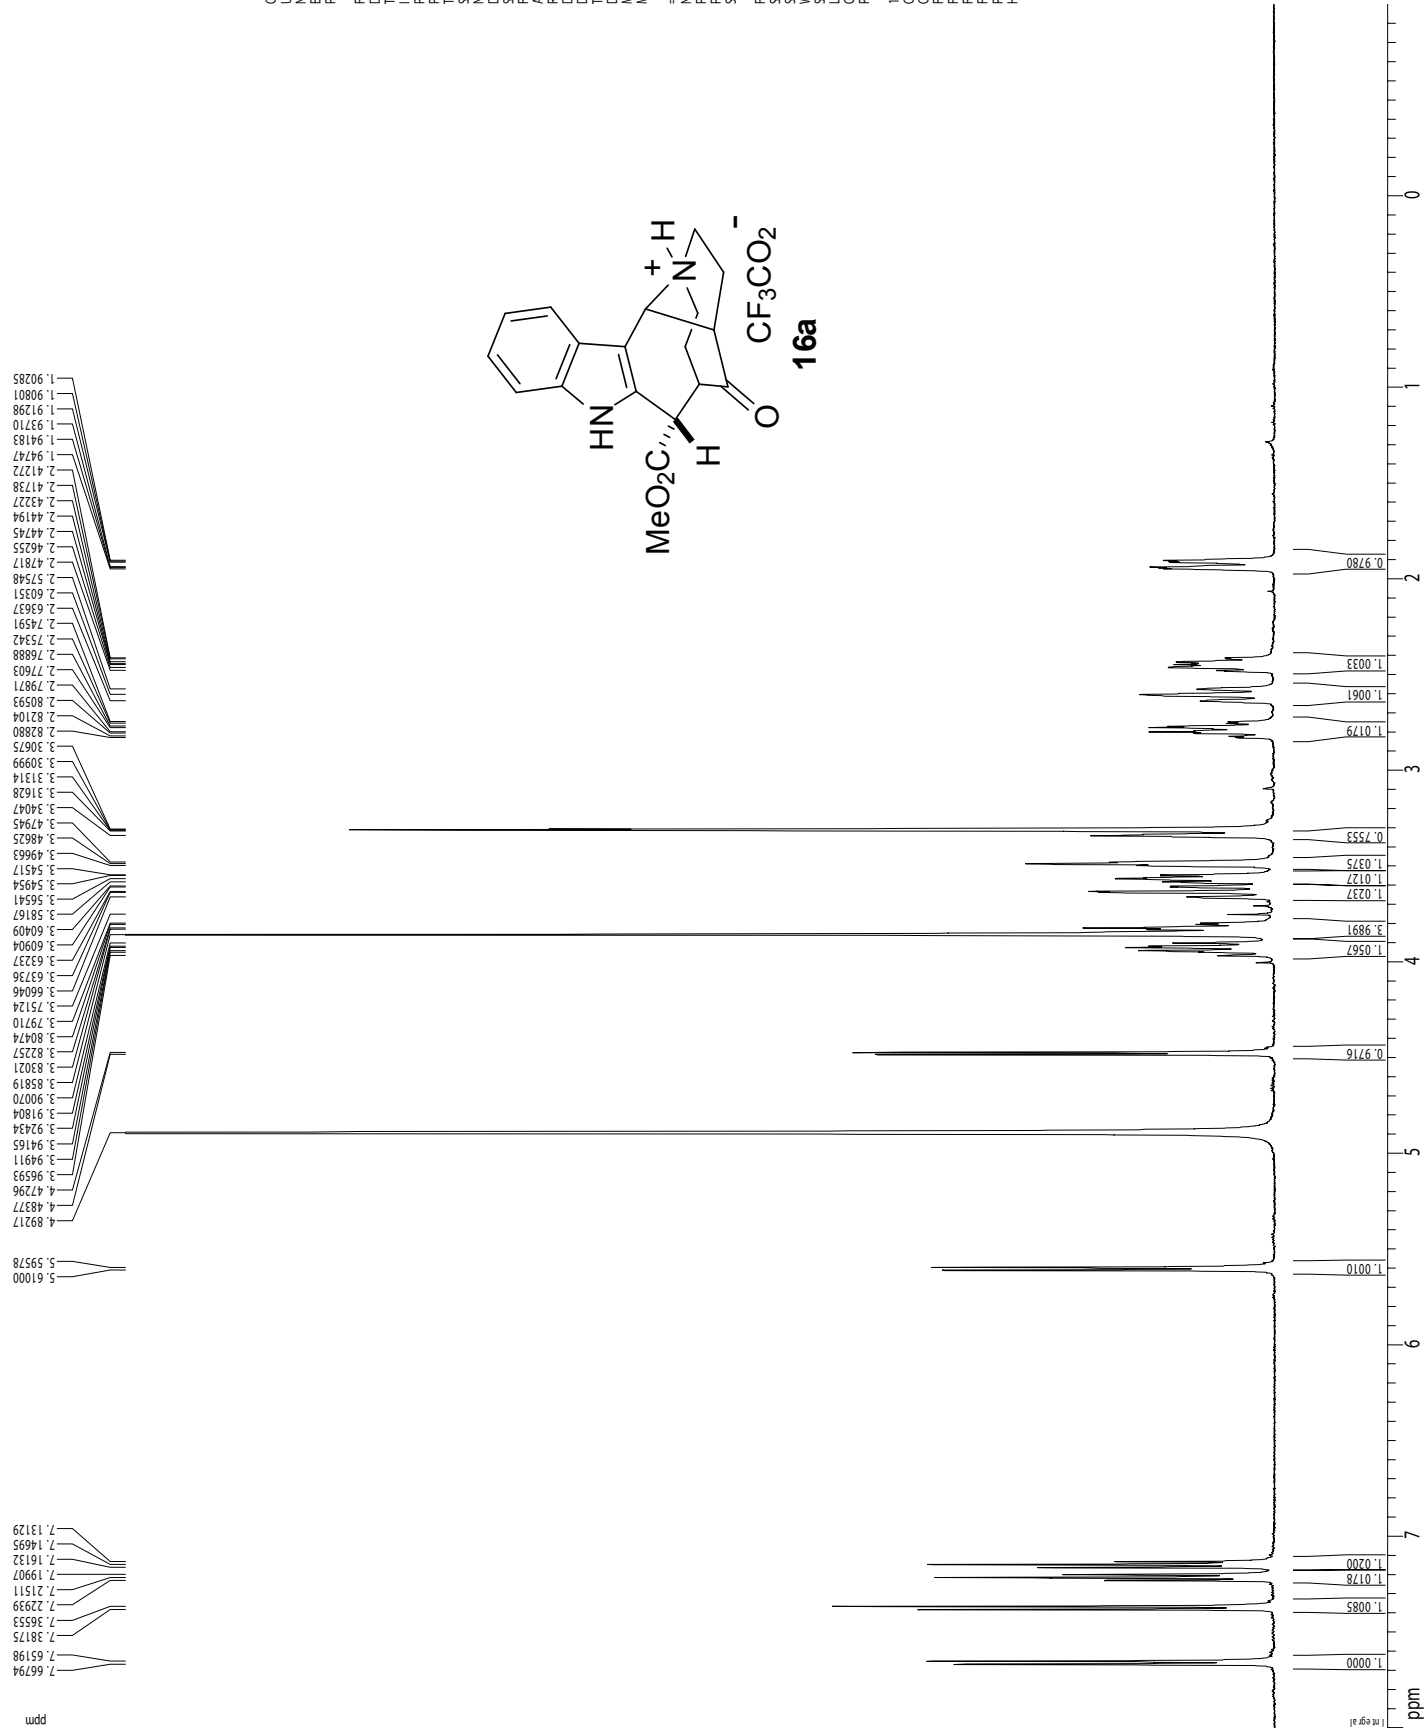

Current Data Parameters  
 USER: conor  
 NAME: CLM-2-2022char  
 EXPNO: 2  
 PROCNO: 1

F2 - Acquisition Parameters  
 Date\_: 20080314  
 Time: 15.02  
 INSTRUM: cryosol00  
 PROBHD: 5 mm CPTCI-1H  
 PULPROG: zgpg30  
 TD: 81738  
 SOLVENT: CD3OD  
 NS: 5  
 DS: 2  
 SWH: 8012.820 Hz  
 FIDRES: 0.098043 Hz  
 AQ: 5.0998774 sec  
 RG: 10.1  
 DW: 62.400 usec  
 DE: 6.00 usec  
 TE: 298.0 K  
 D1: 0.1000000 sec  
 DELTET: 0.0000000 sec  
 ACQHRK: 0.01500000 sec

===== CHANNEL f1 =====  
 NUC1: 1H  
 P1: 7.38 usec  
 PL1: 1.60 dB  
 SFO1: 500.2235015 MHz

F2 - Processing parameters  
 SI: 65536  
 SF: 500.2200185 MHz  
 WDW: no  
 SSB: 0  
 GB: 0.00 Hz  
 PC: 4.00

ID NAME pl or parameter  
 CX: 22.80 cm  
 CY: 42.04 cm  
 F1P: 8.000 ppm  
 F1: 4001.76 Hz  
 F2P: -1.000 ppm  
 F2: -500.22 Hz  
 PPRCM: 0.39474 ppm/cm  
 HZCM: 197.45528 Hz/cm

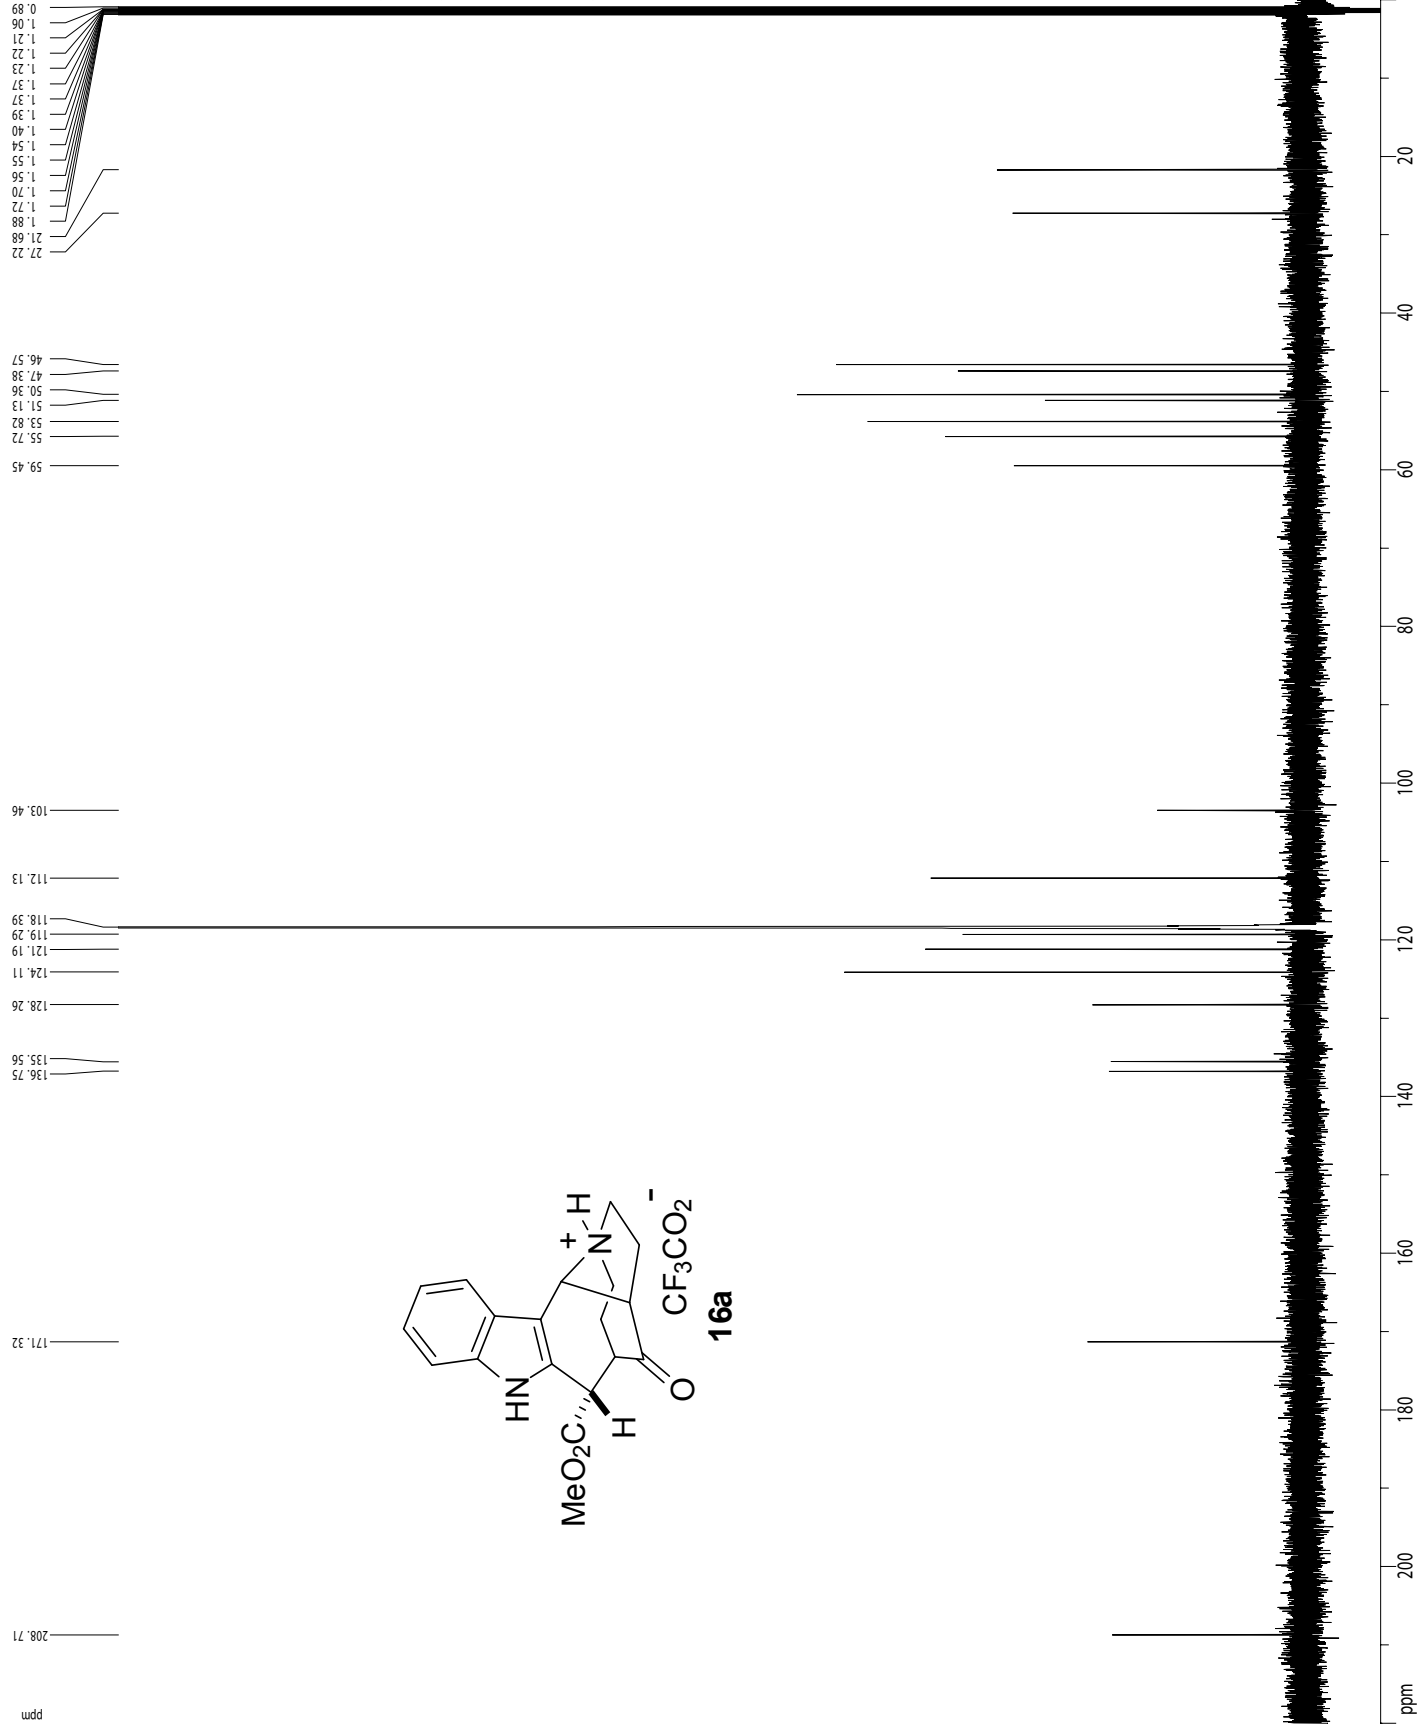

Current Data Parameters  
 USER conor  
 NAME CLM-2-2022char  
 EXPNO 7  
 PROCNO 1

F2 - Acquisition Parameters  
 Date\_ 20080314  
 Time 17.49  
 INSTRUM cryo500  
 PROBHD 5 mm CPTCL 1H  
 PULPROG zgpg30  
 TD 65418  
 SOLVENT CDCl<sub>3</sub>  
 NS 458  
 SWH 30903.031 Hz  
 FIDRES 0.463232 Hz  
 AQ 1.0754470 sec  
 RG 5160.6  
 DW 16.500 usec  
 DE 6.00 usec  
 TE 298.0 K  
 d1 2.0000000 sec  
 d11 0.0300000 sec  
 ACQRES 0.0000000 sec  
 MCORR 0.0150000 sec

===== CHANNEL f1 =====  
 NUC1 <sup>13</sup>C  
 P1 14.75 usec  
 PL1 -1.00 dB  
 SFO1 125.7942546 MHz

===== CHANNEL f2 =====  
 CDPORG waltz16  
 NUC2 <sup>1</sup>H  
 PCPD2 100.00 usec  
 PL2 1.60 dB  
 PL12 24.80 dB  
 SFO2 500.2225011 MHz

F2 - Processing parameters  
 SI 65536  
 SF 125.7802902 MHz  
 WDW no  
 LB 0.00 Hz  
 GB 0  
 PC 2.00

1D NMR plot parameters  
 CX 512.80 cm  
 CY 194.08 cm  
 F1P 220.000 ppm  
 F1 27671.66 Hz  
 F2P 0.000 ppm  
 F2 0.00 Hz  
 PPA1M 9.64912 ppm/cm  
 HZCM 1213.66943 Hz/cm

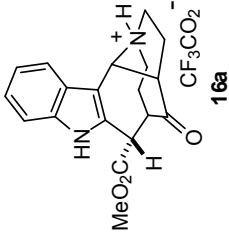

ghmrqc

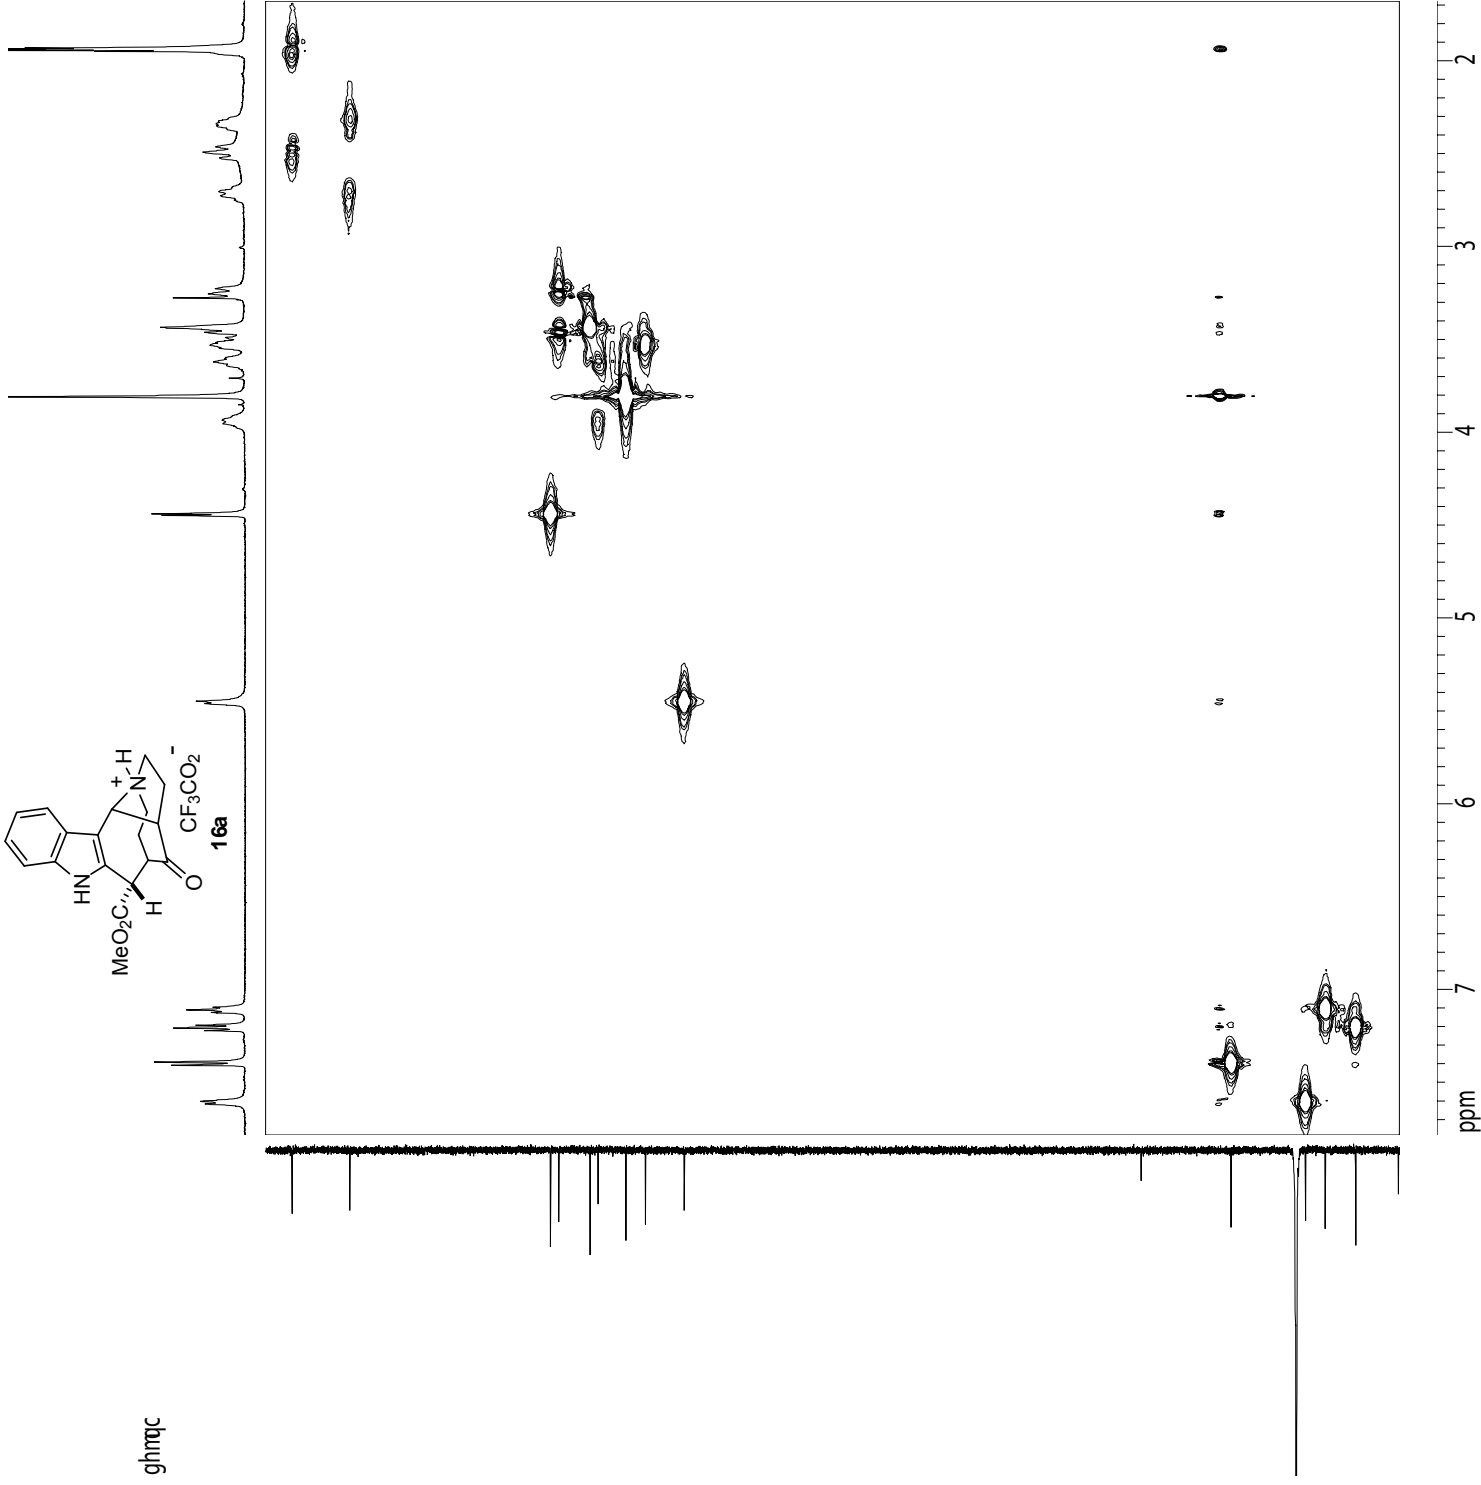

Current Data Parameters  
S46

```

===== Acquisition Parameters =====
Date_      20080314
Time       18.15
INSTRUM    cryo500
PROBHD     5 mm CPTCI 1H
PULPROG    invwga.wu
TD         2048
SOLVENT    CDCl3
DS         16
SWH        3901.401 Hz
FIDRES     1.709668 Hz
AQ         0.2925044 sec
RG         11585.2
DW         142.800 usec
DE         6.50 usec
TE         300.2 K
===== Processing parameters =====
SI         1024
SF         500.260234 MHz
WDW        EM
SSB        0
LB         5.00 Hz
GB         0
PC         2.00

===== Acquisition parameters =====
NUC1       1H
P1         7.38 usec
P2         14.75 usec
PL1        1.60 dB
SFO1       500.2225011 MHz

===== CHANNEL f1 =====
CPDPRG2    zgpg30
NUC2       13C
P3         14.75 usec
PCPD2      65.00 usec
PL2        -1.00 dB
PL12       11.80 dB
SFO2       125.7942548 MHz

===== GRAB F1F2 CHANNEL =====
GPNMR      sine.100
GPNMR2     sine.100
GPNMR3     sine.100
GPA1        0.00 %
GPA2        0.00 %
GPA3        0.00 %
GPA4        0.00 %
GPA5        0.00 %
GPA6        0.00 %
GPA7        30.00 %
GPA8        18.00 %
GPA9        24.00 %
GPA10       1000.00 usec

===== Acquisition parameters =====
NUC1       13C
P1         7.38 usec
SFO1       125.7943 MHz
FIDRES     117.924630 Hz
SW         239.985 ppm
F1F2MODE   undefined

===== Processing parameters =====
SI         1024
SF         500.260234 MHz
WDW        EM
SSB        0
LB         5.00 Hz
GB         0
PC         2.00

===== Acquisition parameters =====
SI         1024
SF         125.7902902 MHz
WDW        EM
SSB        3
LB         0.00 Hz
GB         0

===== 2D NMR plot parameters =====
CX2        15.00 cm
CY2        15.00 cm
F2F1O      7.983 ppm
F2F1LO     3893.27 Hz
F2PH       1.679 ppm
F2H        839.80 Hz
F1F1LO     128.369 ppm
F1LO       16146.23 Hz
F1PH       19.145 ppm
F1H        208.03 Hz
F1F1F2CM   161.579 ppm/cm
F2H2CM     203.5685 Hz/cm
F1PH2CM    7.28159 ppm/cm
F1H2CM     915.88043 Hz/cm

```

<sup>1</sup>H spectrum

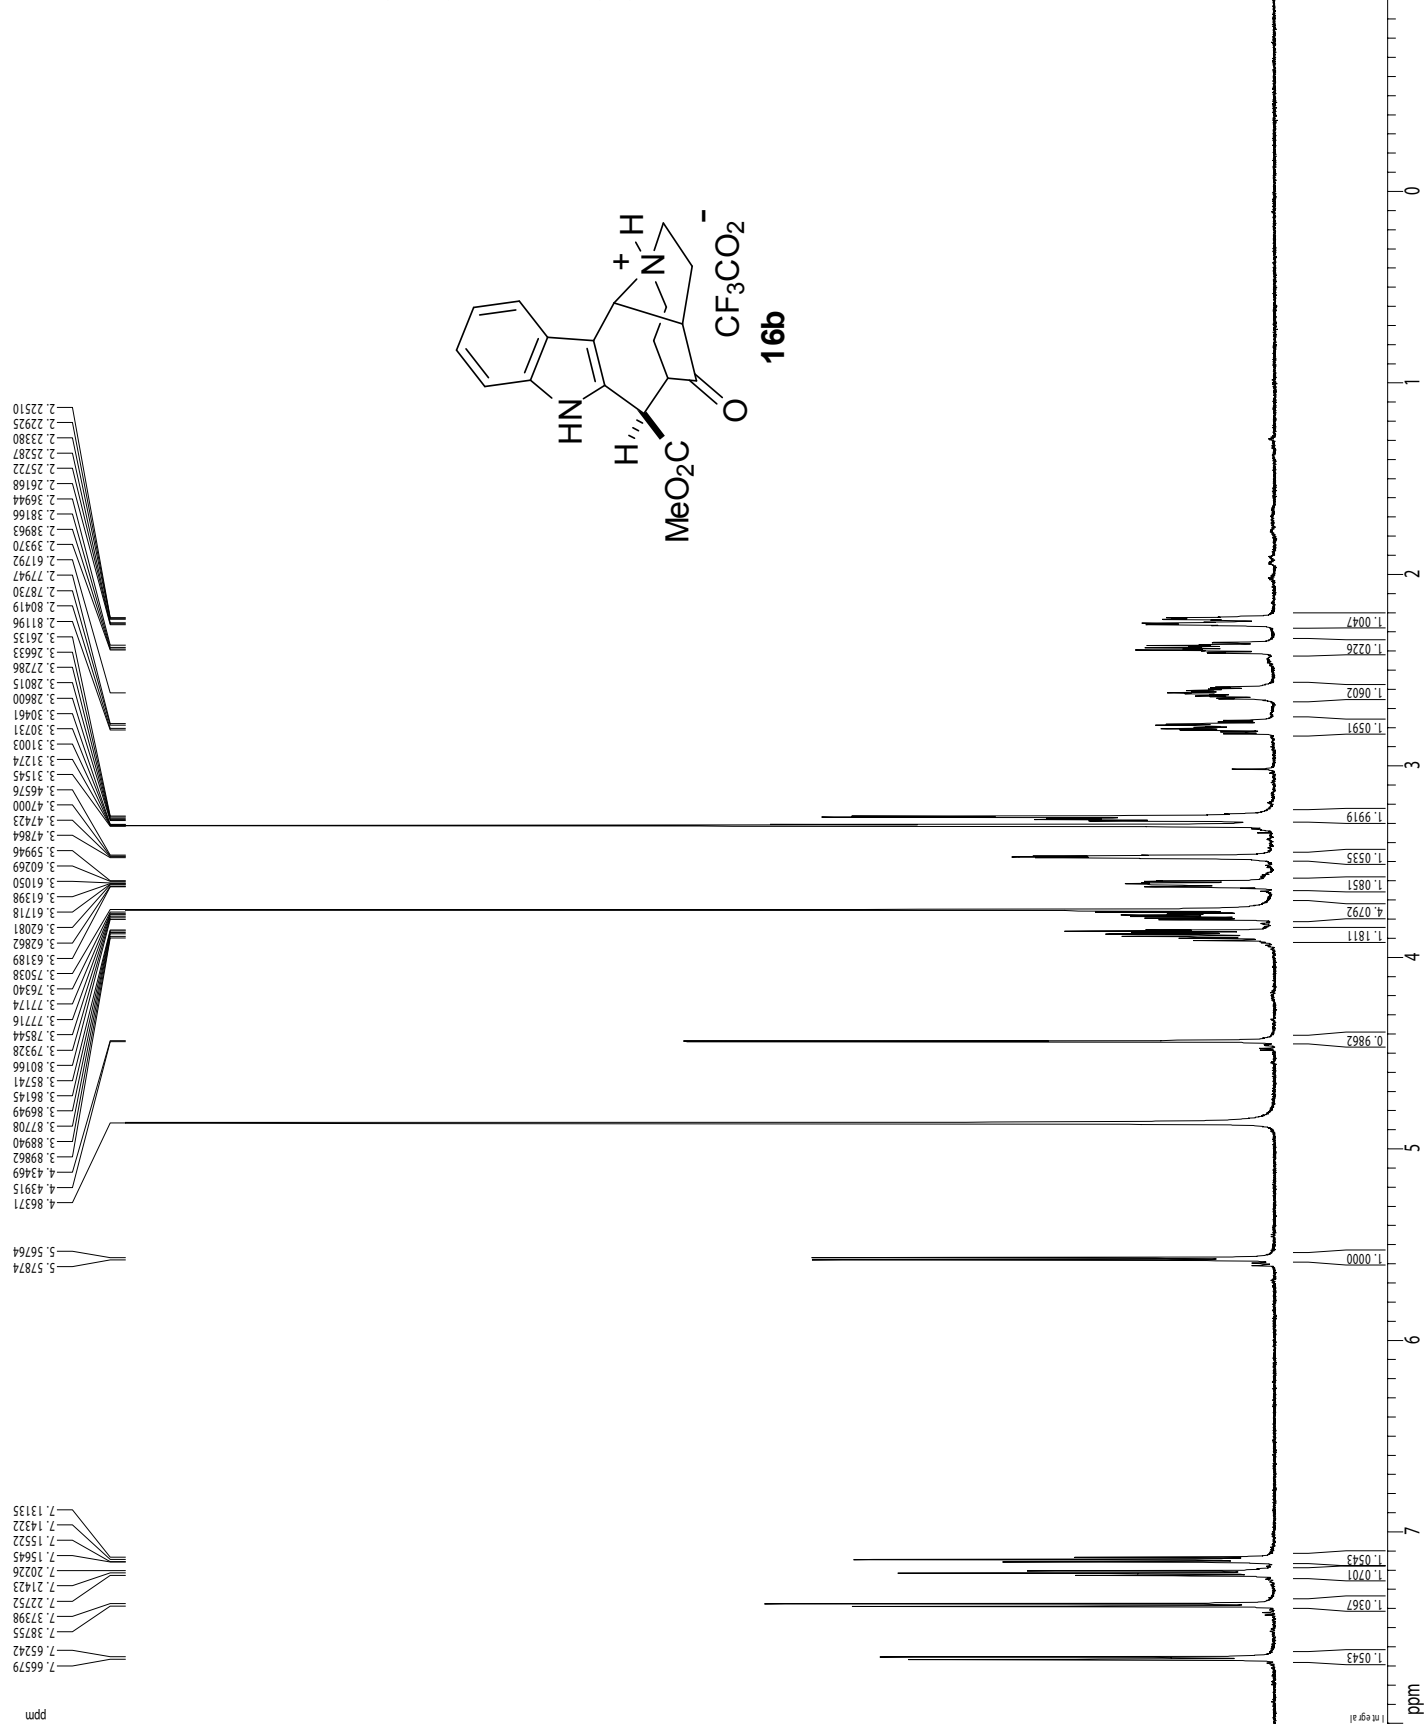

Current Data Parameters  
 USER conor  
 NAME CLM2-20D1  
 EXPNO 130  
 PROCNO 1

F2 - Acquisition Parameters  
 Date\_ 20080401  
 Time 20.25  
 INSTRUM av600  
 PROBHD 5 mm BBO BB-1H  
 PULPROG zg30  
 ID 97938  
 SOLVENT CDCl3  
 NS 9  
 DS 2  
 SWH 9615.385 Hz  
 FIDRES 0.098178 Hz  
 AQ 5.0928259 sec  
 RG 322  
 DW 52.000 usec  
 DE 6.00 usec  
 TE 298.0 K  
 D1 0.10000000 sec  
 TDO 1

===== CHANNEL f1 =====  
 NUC1 1H  
 P1 9.00 usec  
 PL1 -5.30 dB  
 SFO1 600.1342009 MHz

F2 - Processing parameters  
 F2 635.86 MHz  
 SF 600.1300191 MHz  
 WDW tu  
 SSB 0  
 LB 0.00 Hz  
 GB 0  
 PC 1.00

1D NMR plot parameters  
 CX 22.80 cm  
 CY 57.80 cm  
 FIP 8.000 ppm  
 F1 4801.04 Hz  
 F2 -1.000 ppm  
 FZ -600.13 Hz  
 PPKCM 0.39474 ppm/cm  
 HZCM 236.89343 Hz/cm

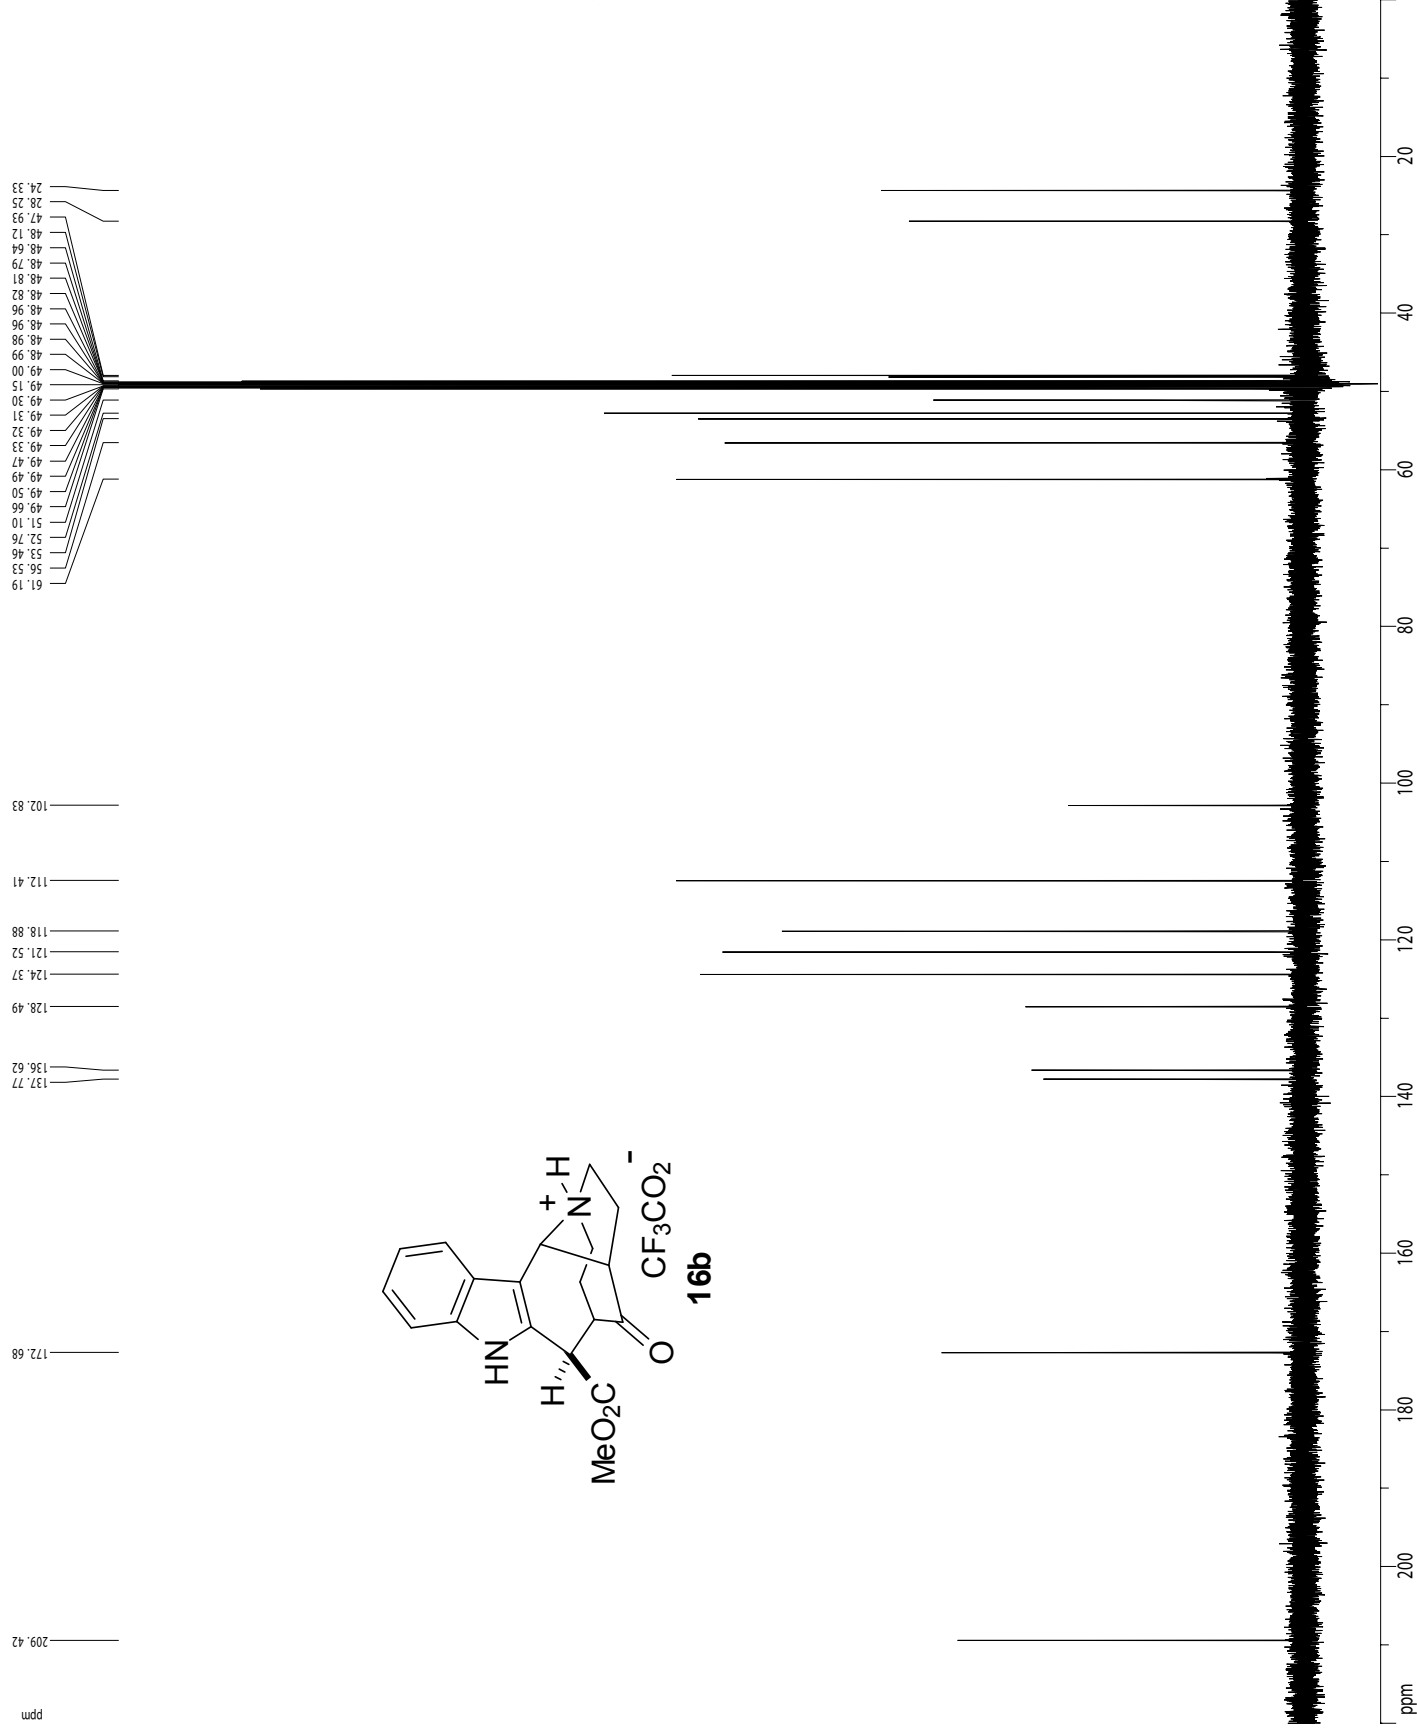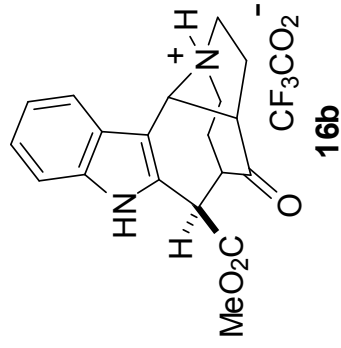

Current Data Parameters  
 USER conor  
 NAME CLM2-20DI  
 EXPNO 36  
 PROCNO 1

F2 - Acquisition Parameters  
 Date\_ 20080402  
 Time 12.38  
 INSTRUM cryo500  
 PROBHD 5 mmCPTCI 1H  
 PULPROG zgpg30  
 TD 65418  
 SOLVENT CDCl<sub>3</sub>  
 NS 224  
 DS 4  
 SWH 30903.031 Hz  
 FIDRES 0.463222 Hz  
 AQ 1.0754470 sec  
 RG 10321.3  
 DW 16.500 usec  
 DE 6.00 usec  
 TE 298.0 K  
 d1 0.2500000 sec  
 d11 0.0300000 sec  
 d12 0.0000000 sec  
 ACQRES 0.0150000 sec

===== CHANNEL f1 =====  
 NUC1 <sup>13</sup>C  
 P1 14.75 usec  
 PL1 -1.00 dB  
 SFO1 125.7942546 MHz

===== CHANNEL f2 =====  
 CDPORG waltz16  
 NUC2 <sup>1</sup>H  
 PCPD2 100.00 usec  
 PL2 1.60 dB  
 PL12 24.80 dB  
 SFO2 500.2225011 MHz

F2 - Processing parameters  
 SI 65536  
 SF 125.7802288 MHz  
 WDW no  
 LB 0.00 Hz  
 GB 0  
 PC 2.00

ID.NMR plot parameters  
 CV 257.80 cm  
 CY 98.38 cm  
 F1P 220.000 ppm  
 F1 27671.65 Hz  
 F2P 0.000 ppm  
 F2 0.00 Hz  
 PPA1M 9.64912 ppm/cm  
 HZCM 1213.66882 Hz/cm



USER comor  
NAME CLM 2-2001  
EXPNO 133  
PROCNO 1

F2 - Acquisition Parameters

Date\_ 20080401  
Time 23.54  
INSTRUM av600  
PROBHD 5 mm BBO BB-1H  
PULPROG zgpg30  
TD 65536  
SOLVENT CDCl3  
NS 2  
DS 16  
SWH 3597.122 Hz  
FIDRES 4.650813 Hz  
AQ 0.1234620 sec  
RG 2050  
DW 139.000 usec  
DE 6.00 usec  
TE 298.0 K  
145.0000000  
d0 0.00000300 sec  
d1 1.10000002 sec  
d2 0.00344628 sec  
d3 0.00002000 sec  
d4 0.00000400 sec  
d5 0.00000000 sec  
DELTA1 0.0022428 sec  
170 0.00001380 sec

CHANNEL f1

NUC1 1H  
P1 9.00 usec  
PL1 18.00 dB  
SFO1 600.1330006 MHz

CHANNEL f2

CPDPRG2 garp  
NUC2 13C  
P3 7.60 usec  
PL2 0.00 dB  
PL3 19.28 dB  
SFO2 150.9194685 MHz

GRAB F1 CHANNEL

GNAM1 SINE 100  
GNAM2 SINE 100  
GNAM3 SINE 100  
GZ1 50.00 %  
GZ2 30.00 %  
GZ3 40.10 %  
PT6 1000.00 usec

F1 - Acquisition parameters

NU0 2  
TD 256  
SFO1 150.9194 MHz  
FIDRES 141.330792 Hz  
SW 240.074 ppm  
FHM0DE 0

F2 - Processing parameters

SI 600.1300191 MHz  
WDW EM  
SSB 0  
LB 5.00 Hz  
GB 0  
PC 1.40

F1 - Processing parameters

SI 1024  
MC2 0  
SF 150.9025840 MHz  
WDW COSINE  
SSB 3  
LB 0.00 Hz  
GB 0

2D NMR plot parameters

CX2 18.00 cm  
CY1 15.00 cm  
F2PLO 7.807 ppm  
F2LO 4665.25 Hz  
F2PHI 2.100 ppm  
F2H 1260.25 Hz  
F1PLO 130.718 ppm  
F1LO 19725.69 Hz  
F1PHI 19.577 ppm  
F1H 2954.29 Hz  
F2PPMCM 0.31706 ppm/cm  
F2HZCM 190.27747 Hz/cm  
F1PPMCM 7.40937 ppm/cm  
F1HZCM 1118.09338 Hz/cm

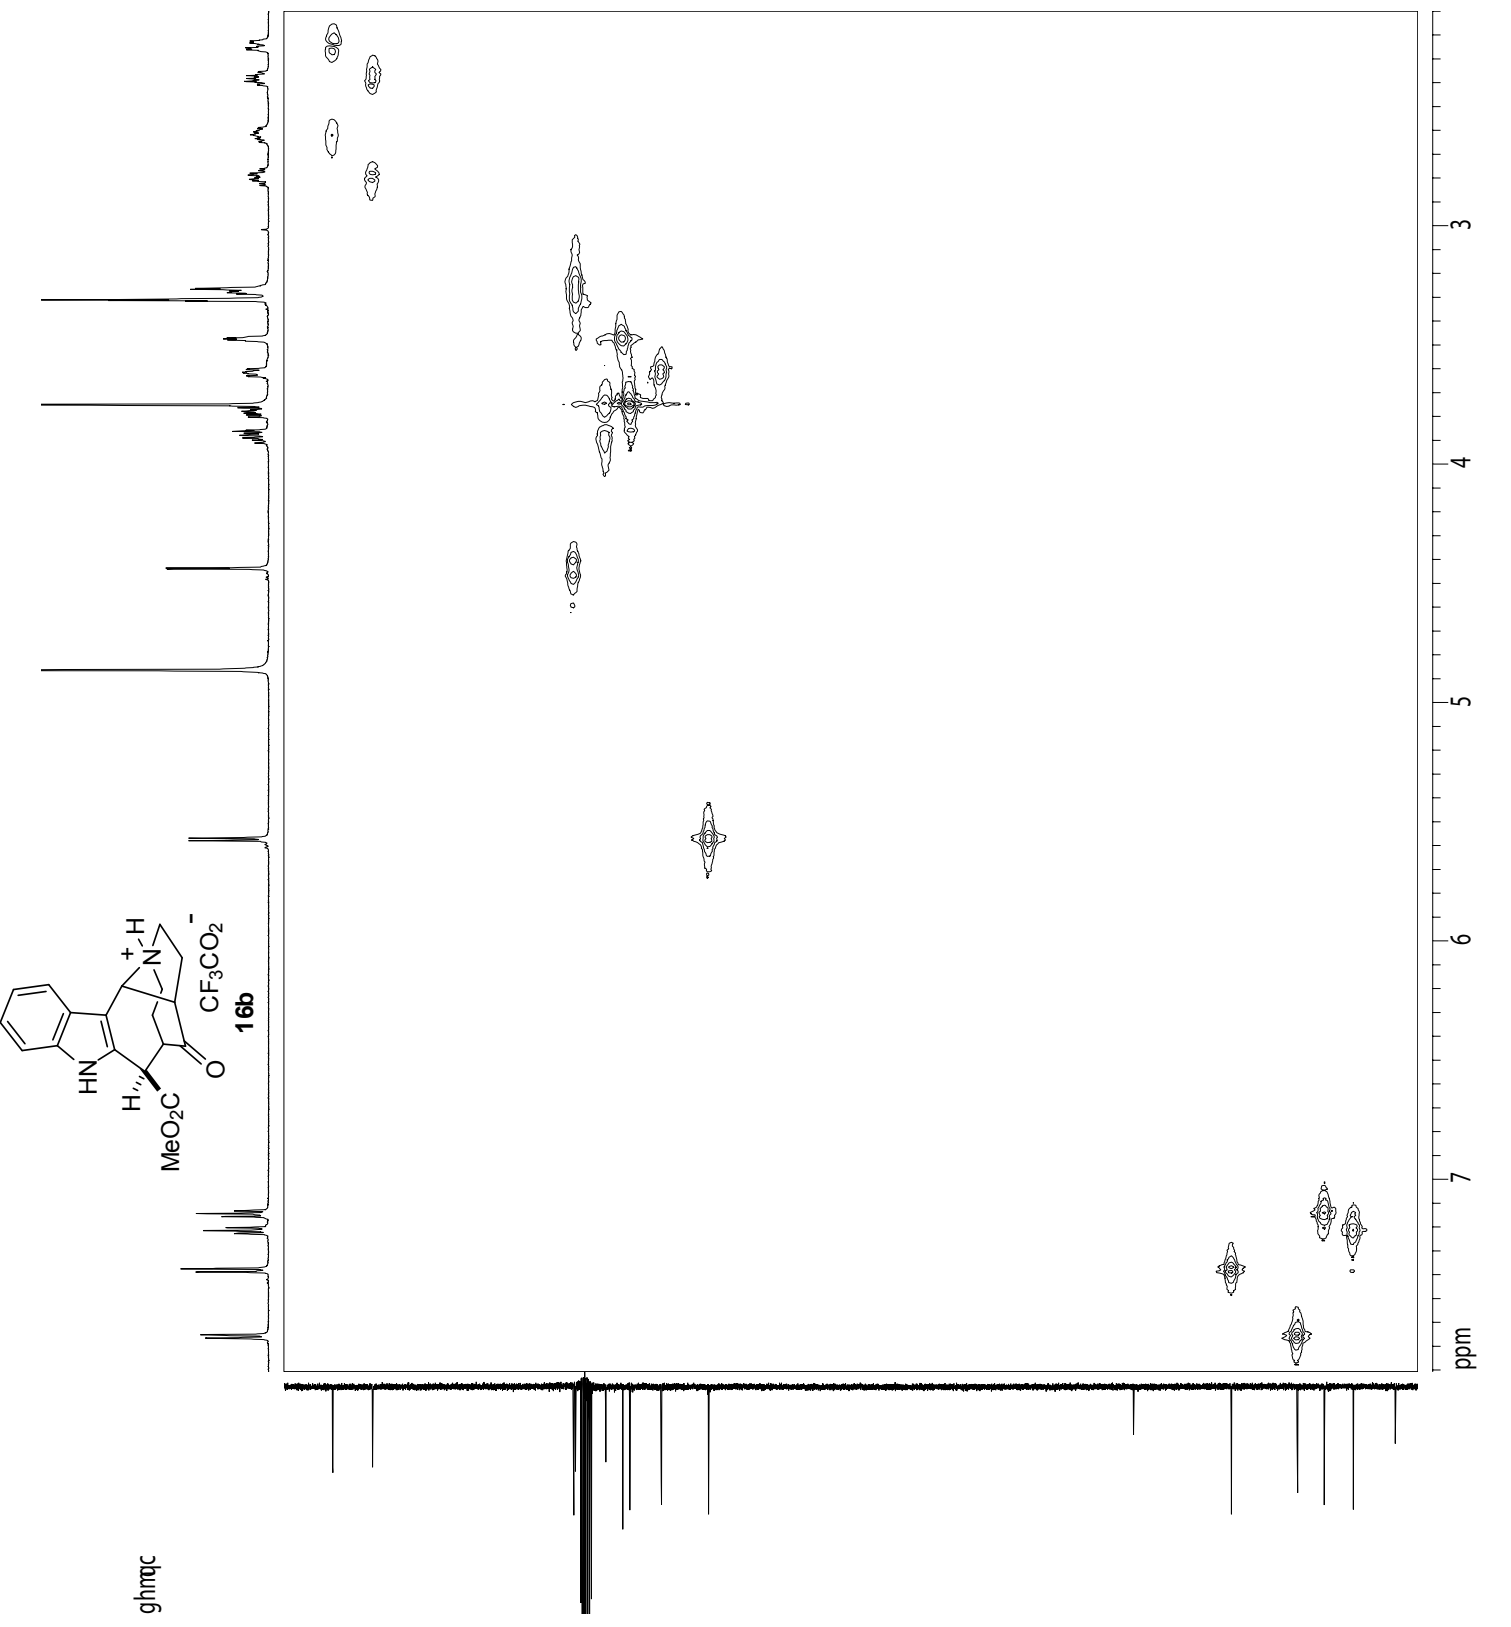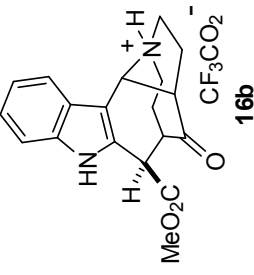

ghraq

<sup>1</sup>H spectrum

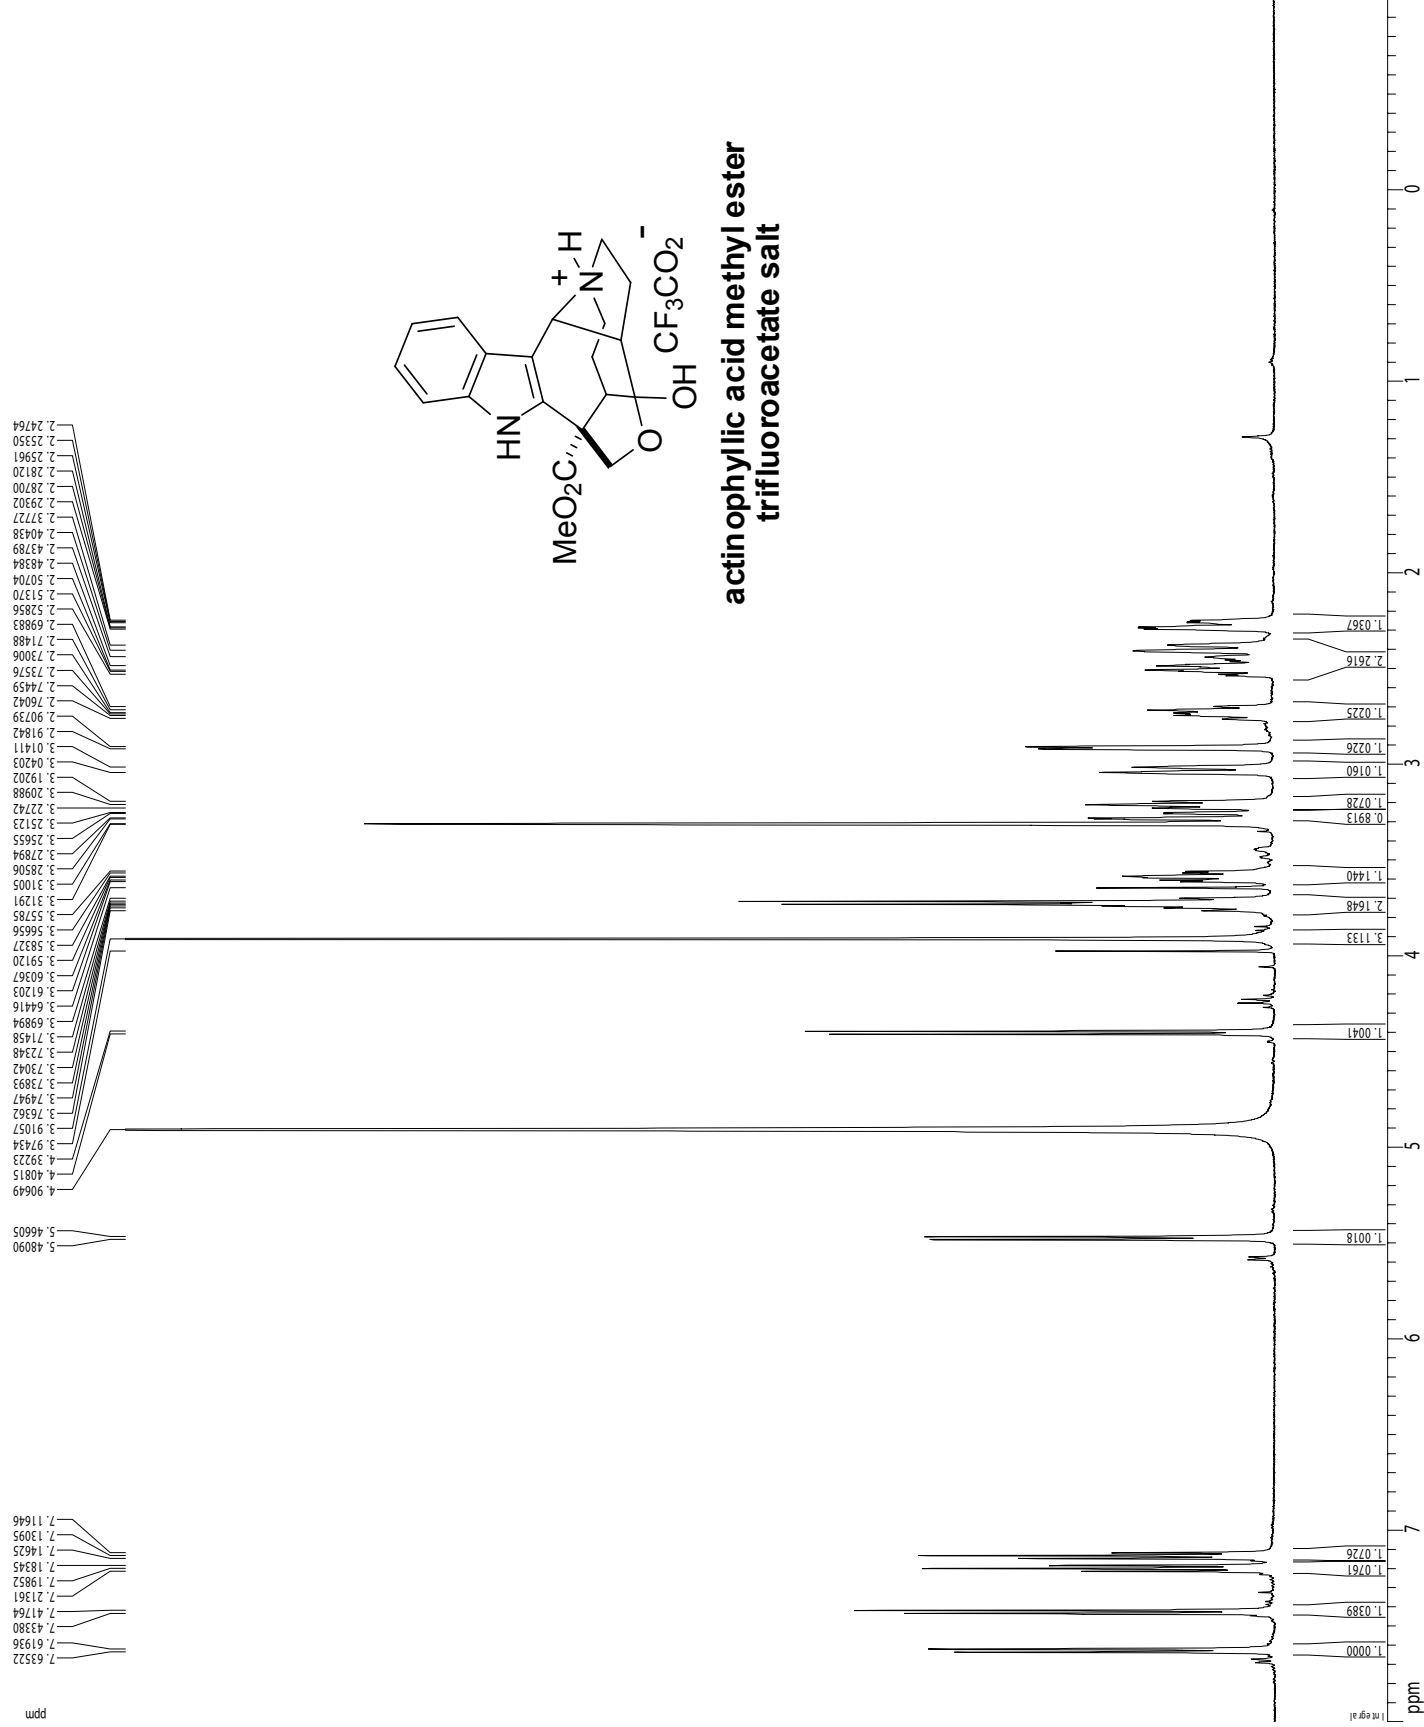

Current Data Parameters  
 USER: conor  
 NAME: CLM 2-65A  
 EXPNO: 2  
 PROCNO: 1

F2 - Acquisition Parameters  
 Date\_: 20080408  
 Time: 21.33  
 INSTRUM: cryo500  
 PROBRD: 5 mm CPTCI-1H  
 PULPROG: zgpg30  
 TD: 81728  
 SOLVENT: CD3OD  
 NS: 8  
 DS: 2  
 SWH: 8012.820 Hz  
 FIDRES: 0.098043 Hz  
 AQ: 5.0998774 sec  
 RG: 9  
 DW: 62.400 usec  
 DE: 6.00 usec  
 TE: 298.0 K  
 D1: 0.1000000 sec  
 ACQRES: 0.0000000 sec  
 ICORR: 0.01500000 sec  
 ===== CHANNEL f1 =====  
 NUC1: <sup>1</sup>H  
 P1: 7.38 usec  
 PL1: 1.60 dB  
 SFO1: 500.2235015 MHz

F2 - Processing parameters  
 SI: 65536  
 SF: 500.2200178 MHz  
 WDW: no  
 SSB: 0  
 GB: 0.00 Hz  
 PC: 4.00

ID NAME pl or parameter  
 CX: 22.80 cm  
 CY: 36.39 cm  
 F1P: 8.000 ppm  
 F1: 4001.76 Hz  
 F2P: -1.000 ppm  
 F2: -500.22 Hz  
 PPRCM: 0.39474 ppm/cm  
 HZCM: 197.45528 Hz/cm

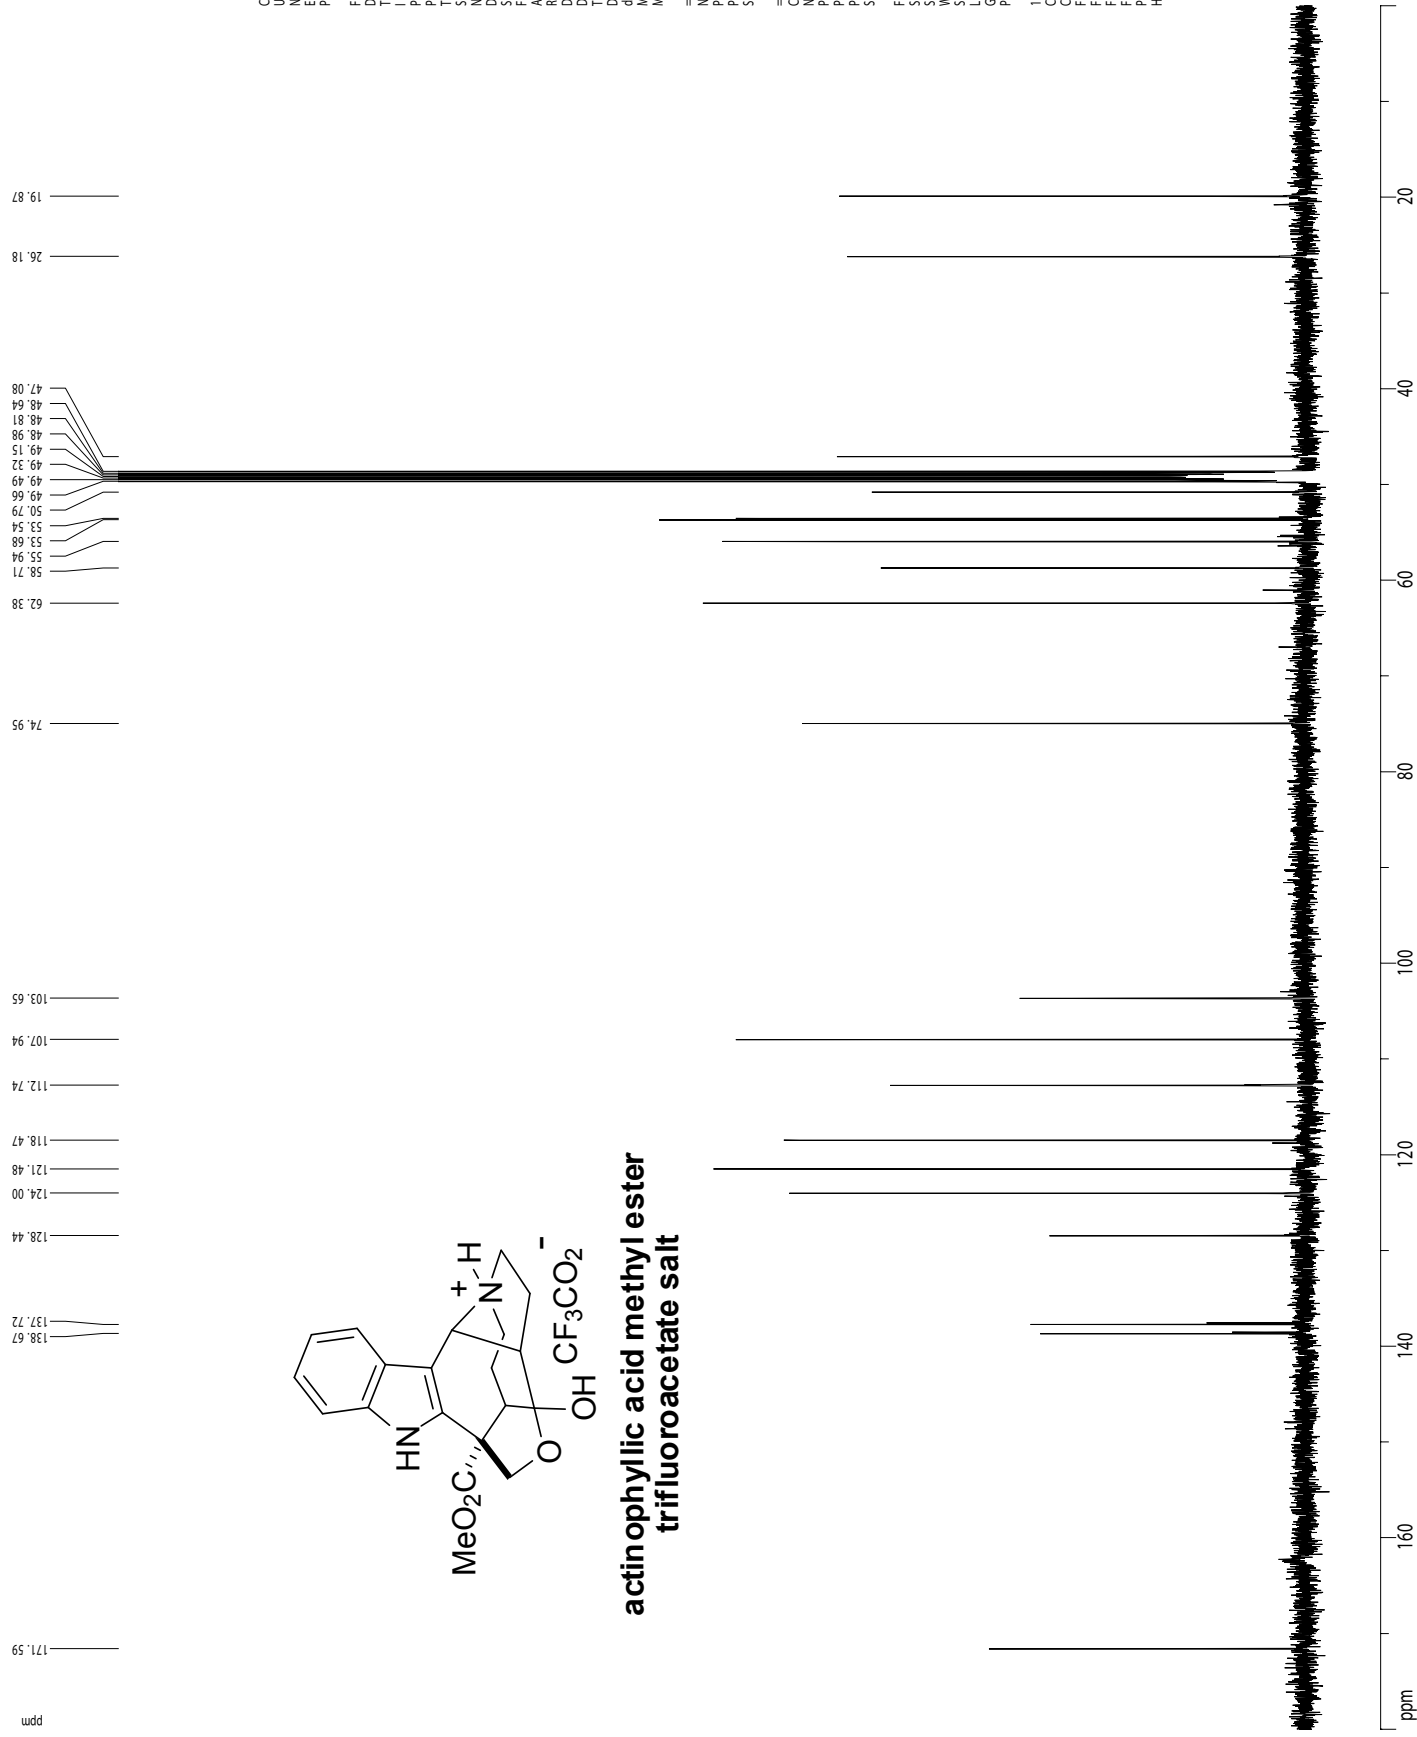

```

Current Data Parameters
USER      connor
NAME      CLM 2-65A
EXPNO     7
PROCNO    1

F2 - Acquisition Parameters
Date_     20080408
Time      21.34
INSTRUM   cryo500
PROBHD    5 mmCPTCL 1H
PULPROG   zgpg30
TD         65418
SOLVENT    CD3OD
NS         110
DS         4
SWH        30903.031 Hz
FIDRES     0.463232 Hz
AQ         1.07544470 sec
RG         10321.3
DW         16.500 usec
DE         6.00 usec
TE         298.0 K
d1         2.0000000 sec
d11        0.0300000 sec
ACQRES    0.0000000 sec
AQBRK     0.01500000 sec

===== CHANNEL f1 =====
NUC1       13C
P1         14.75 usec
PL1        -1.00 dB
SFO1       125.7942546 MHz

===== CHANNEL f2 =====
COPPRG2   waltz16
NUC2       1H
PCPD2     100.00 usec
PL2        1.60 dB
PL12       24.80 dB
SFO2       500.2225011 MHz

F2 - Processing parameters
SI         65536
SF         125.7802288 MHz
WDW        EM
SSB        0
LB         1.00 Hz
GB         0
PC         2.00

ID_NMR     plot parameters
CV         252.80 cm
CY         139.25 cm
EIIP       180.000 ppm
F1P        22640.44 Hz
F2P        0.000 ppm
F2         0.00 Hz
PP4CM      7.89474 ppm/cm
HZCM       993.00183 Hz/cm
    
```

F2 - Acquisition Parameters

Date\_ 20080408  
 Time 21.49  
 INSTRUM cryo500  
 PROBHD 5 mm CPTCI TH  
 PULPROG invwga.wu  
 ID 2048  
 ACQMENT CDDO  
 DS 16  
 SWH 3004.808 Hz  
 FIDRES 1.467191 Hz  
 AQ 0.3408372 sec  
 RG 11586.2  
 DW 166.400 usec  
 DE 6.50 usec  
 TE 300.2 K  
 CHSTZ  
 d0 145.0000000 sec  
 d1 0.0000000 sec  
 d2 0.00344628 sec  
 d13 0.00002000 sec  
 d14 0.00003000 sec  
 d16 0.00020000 sec  
 d20 0.0042228 sec  
 INU 0.0001800 sec

CHANNEL f1

NUC1 H  
 P1 7.38 usec  
 P2 14.75 usec  
 PL1 1.60 dB  
 SFO1 500.2225011 MHz

CHANNEL f2

CPDPRG2 JRC  
 NUC2 13C  
 P3 14.75 usec  
 PCPD2 65.00 usec  
 PL2 -1.00 dB  
 PL12 11.80 dB  
 SFO2 125.7996259 MHz

GRAB F1 CHANNEL

GPWAW sine.100  
 GPWAB sine.100  
 GPV1 0.00 %  
 GPV2 0.00 %  
 GPV3 0.00 %  
 GPV4 0.00 %  
 GPV5 0.00 %  
 GPV6 0.00 %  
 GPV7 0.00 %  
 GPV8 0.00 %  
 GPV9 0.00 %  
 GPV10 0.00 %  
 GPV11 0.00 %  
 GPV12 0.00 %  
 GPV13 0.00 %  
 GPV14 0.00 %  
 GPV15 0.00 %  
 GPV16 0.00 %  
 GPV17 0.00 %  
 GPV18 0.00 %  
 GPV19 0.00 %  
 GPV20 0.00 %  
 GPV21 0.00 %  
 GPV22 0.00 %  
 GPV23 0.00 %  
 GPV24 0.00 %  
 GPV25 0.00 %  
 GPV26 0.00 %  
 GPV27 0.00 %  
 GPV28 0.00 %  
 GPV29 0.00 %  
 GPV30 0.00 %  
 GPV31 0.00 %  
 GPV32 0.00 %  
 GPV33 0.00 %  
 GPV34 0.00 %  
 GPV35 0.00 %  
 GPV36 0.00 %  
 GPV37 0.00 %  
 GPV38 0.00 %  
 GPV39 0.00 %  
 GPV40 0.00 %  
 GPV41 0.00 %  
 GPV42 0.00 %  
 GPV43 0.00 %  
 GPV44 0.00 %  
 GPV45 0.00 %  
 GPV46 0.00 %  
 GPV47 0.00 %  
 GPV48 0.00 %  
 GPV49 0.00 %  
 GPV50 0.00 %  
 GPV51 0.00 %  
 GPV52 0.00 %  
 GPV53 0.00 %  
 GPV54 0.00 %  
 GPV55 0.00 %  
 GPV56 0.00 %  
 GPV57 0.00 %  
 GPV58 0.00 %  
 GPV59 0.00 %  
 GPV60 0.00 %  
 GPV61 0.00 %  
 GPV62 0.00 %  
 GPV63 0.00 %  
 GPV64 0.00 %  
 GPV65 0.00 %  
 GPV66 0.00 %  
 GPV67 0.00 %  
 GPV68 0.00 %  
 GPV69 0.00 %  
 GPV70 0.00 %  
 GPV71 0.00 %  
 GPV72 0.00 %  
 GPV73 0.00 %  
 GPV74 0.00 %  
 GPV75 0.00 %  
 GPV76 0.00 %  
 GPV77 0.00 %  
 GPV78 0.00 %  
 GPV79 0.00 %  
 GPV80 0.00 %  
 GPV81 0.00 %  
 GPV82 0.00 %  
 GPV83 0.00 %  
 GPV84 0.00 %  
 GPV85 0.00 %  
 GPV86 0.00 %  
 GPV87 0.00 %  
 GPV88 0.00 %  
 GPV89 0.00 %  
 GPV90 0.00 %  
 GPV91 0.00 %  
 GPV92 0.00 %  
 GPV93 0.00 %  
 GPV94 0.00 %  
 GPV95 0.00 %  
 GPV96 0.00 %  
 GPV97 0.00 %  
 GPV98 0.00 %  
 GPV99 0.00 %  
 GPV100 0.00 %

F1 - Acquisition parameters

NUC1 H  
 P1 7.38 usec  
 P2 14.75 usec  
 PL1 1.60 dB  
 SFO1 500.2225011 MHz

F2 - Processing parameters

SF 1024  
 WDW 500.2200778 MHz  
 SSB 0  
 LB 5.00 Hz  
 GB 0  
 PC 1.40

F1 - Processing parameters

SF 1024  
 WDW 125.7902368 MHz  
 SSB 3  
 LB 5.00 Hz  
 GB 0

2D NMR plot parameters

CXZ 15.00 cm  
 CZ 15.00 cm  
 F2P10 7.809 ppm  
 F2P11 3906.47 Hz  
 F2PH 2.1067 ppm  
 F2H 1033.71 Hz  
 F1P10 128.434 ppm  
 F1LO 16154.48 Hz  
 F1PH 16.030 ppm  
 F1P11 2016.29 Hz  
 F1P12 16154.48 Hz  
 F1P13 191.51736 Hz  
 F1P14 7.49960 ppm/cm  
 F1HZCM 942.54614 Hz/cm

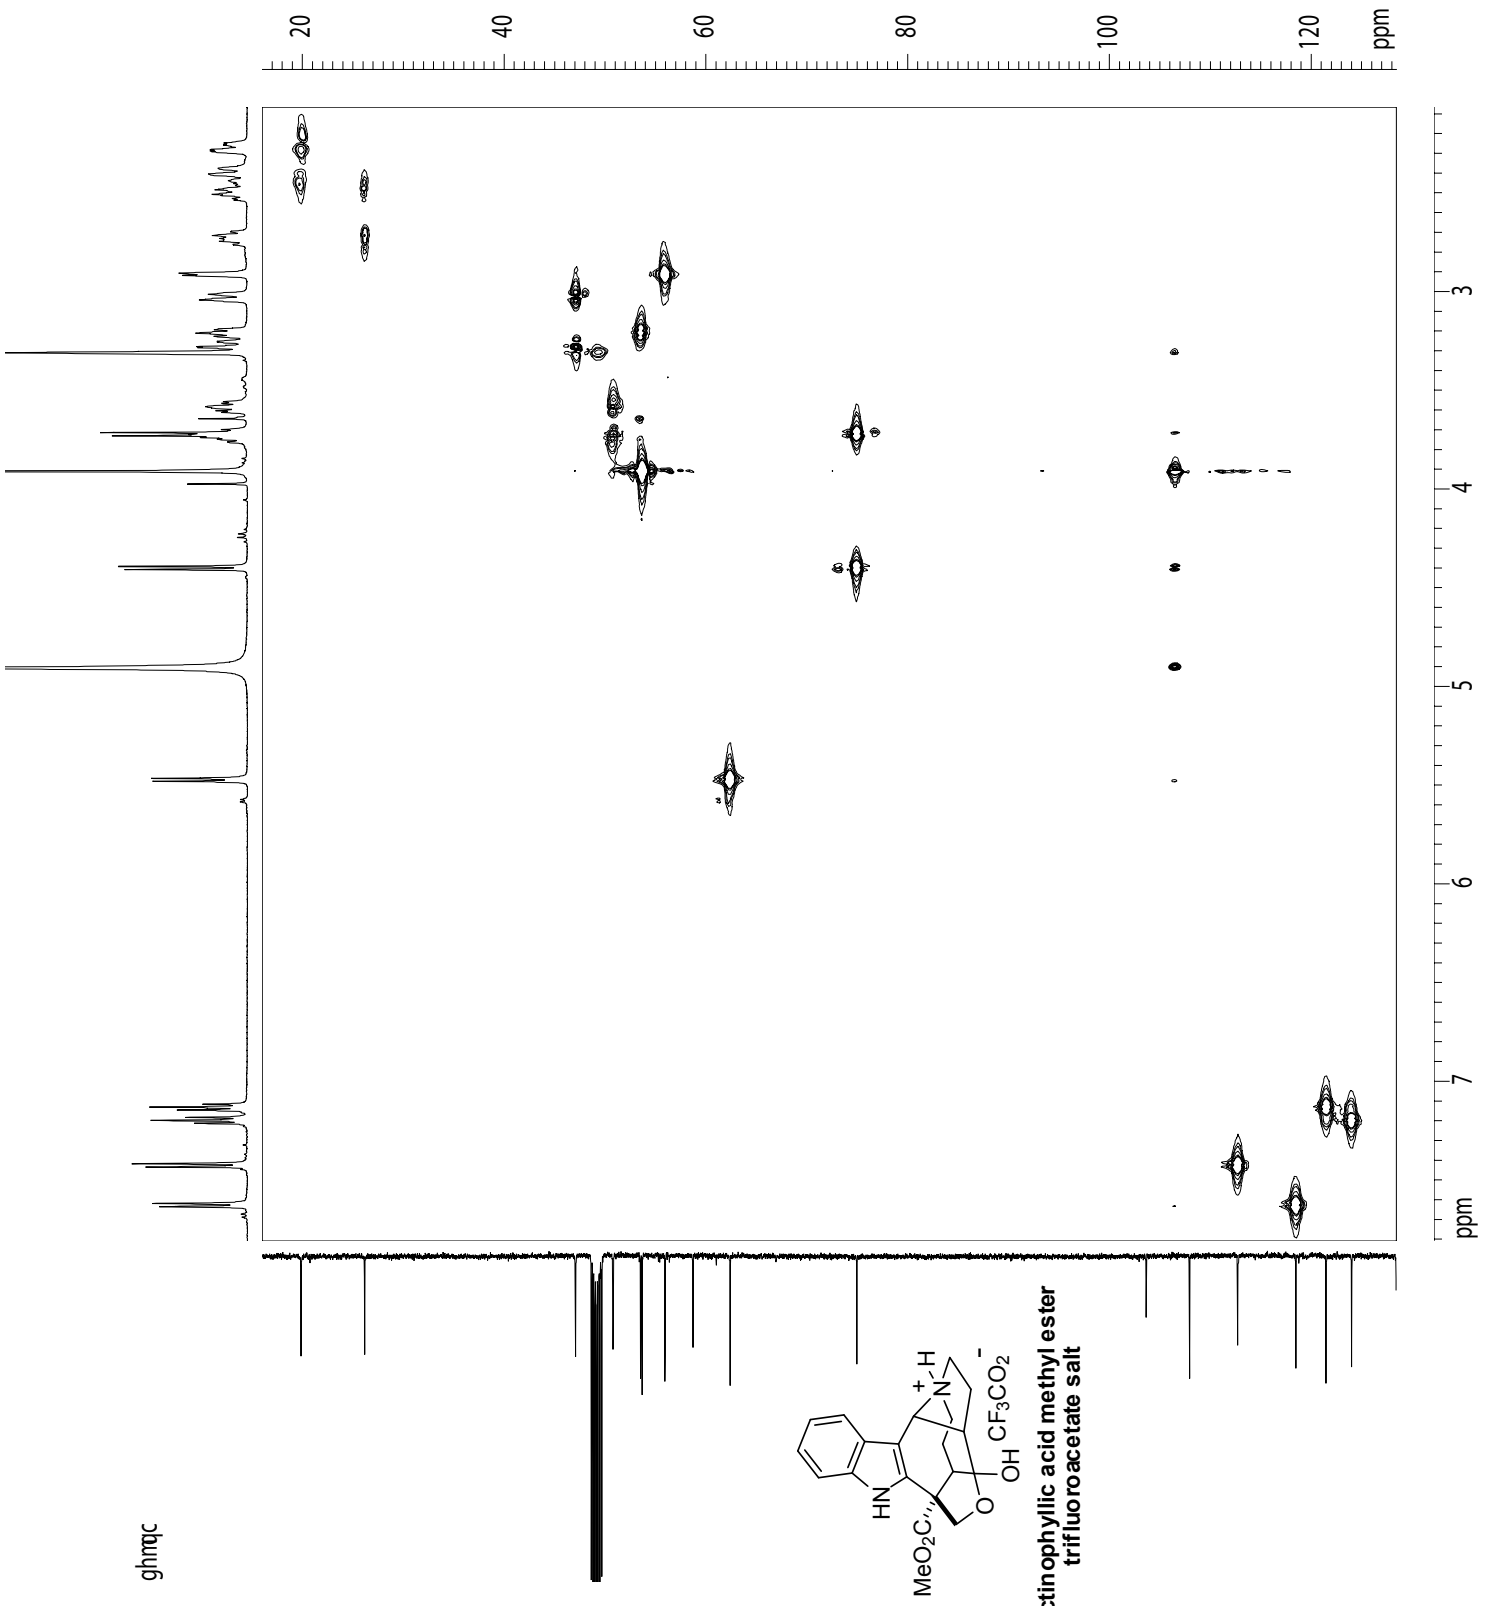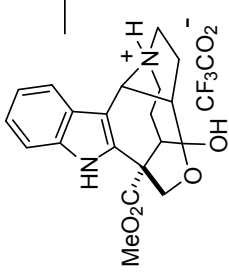

actinophyllic acid methyl ester trifluoroacetate salt

ghmrc

1H spectrum

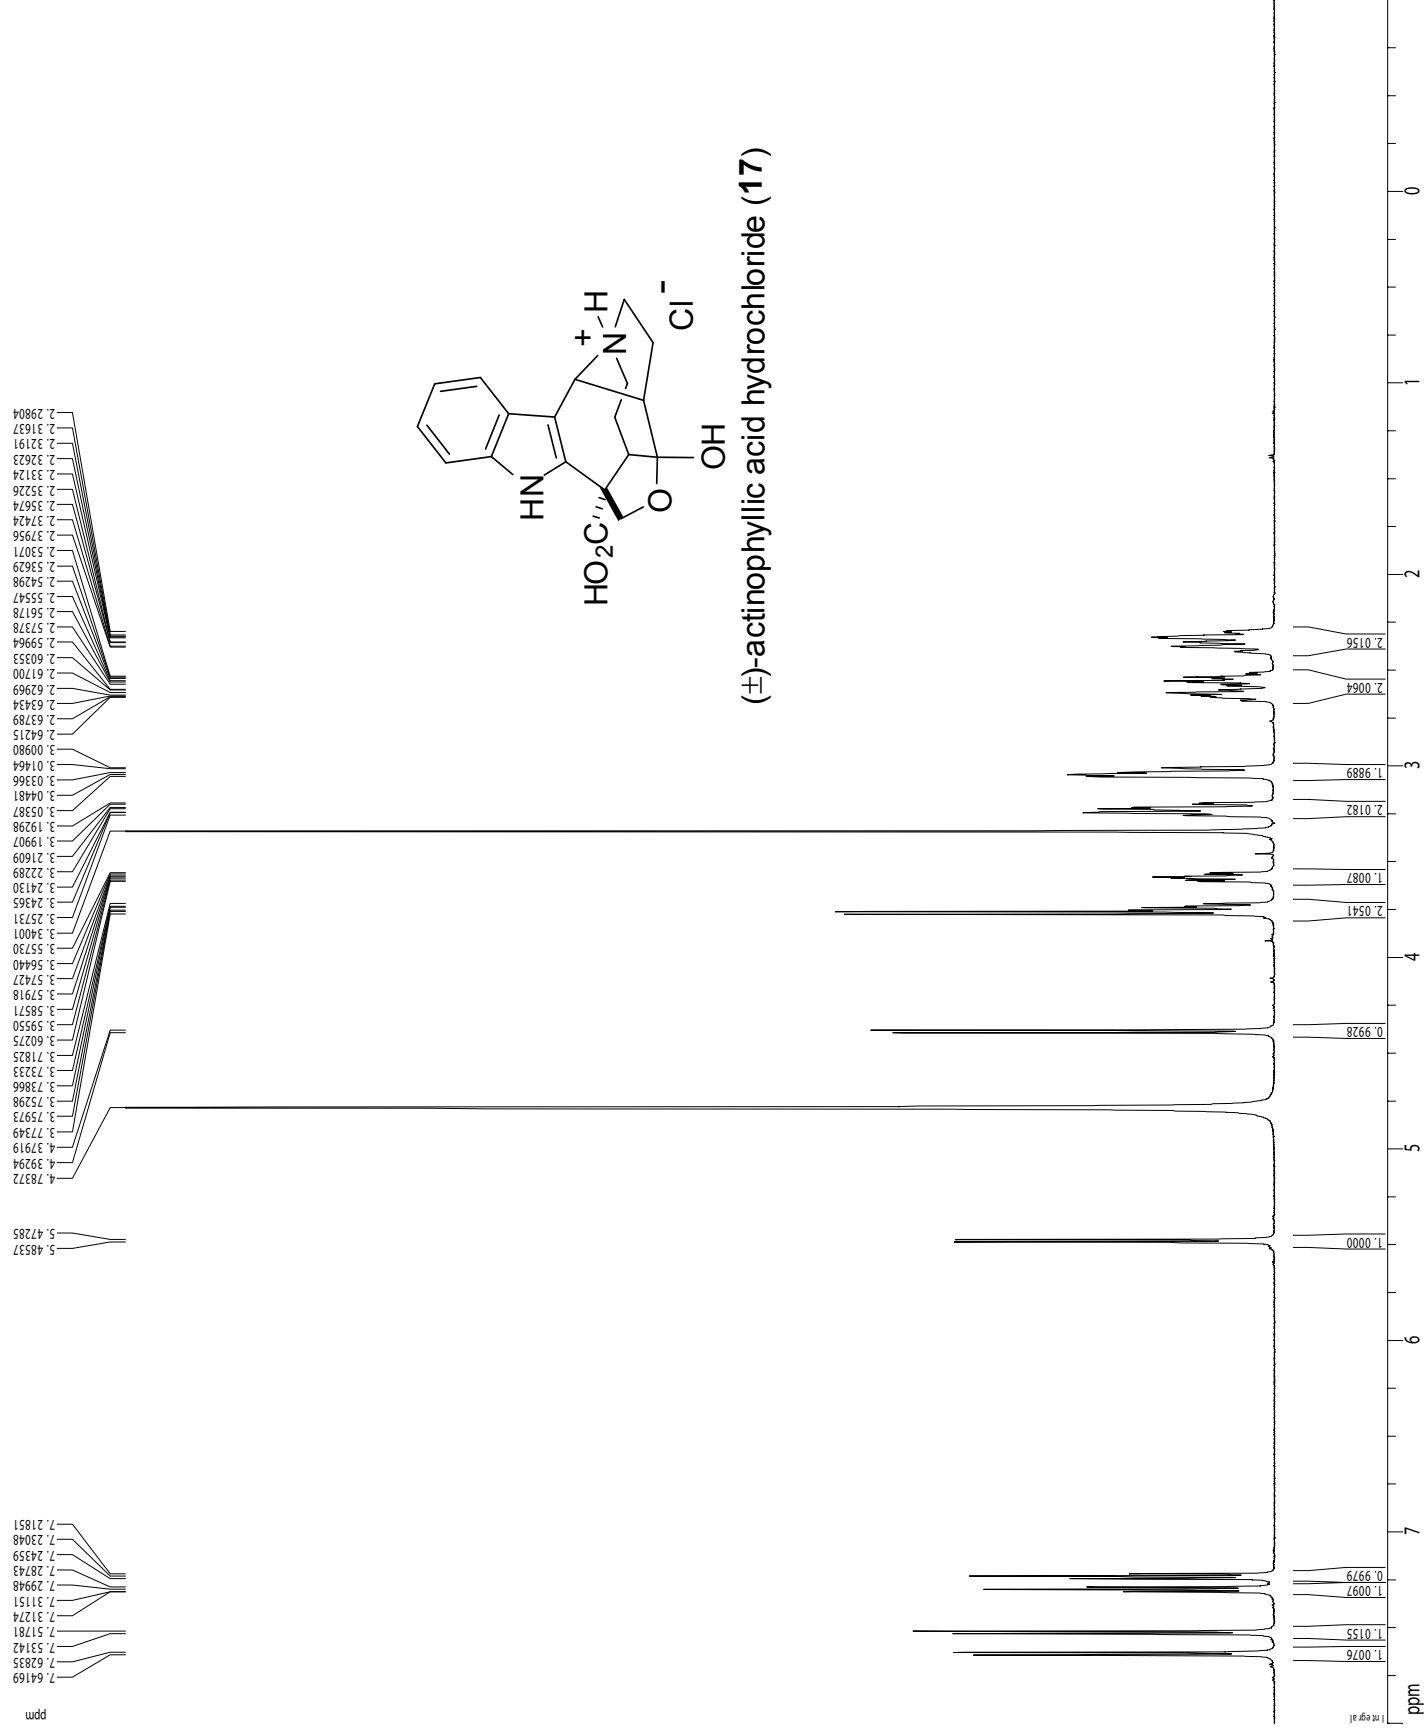

Current Data Parameters  
 USER conor  
 NAME CLM-2-22E-D20  
 EXPNO 15  
 PRCCNO 1

F2 - Acquisition Parameters  
 Date\_ 20080209  
 Time 11.39  
 INSTRUM av600  
 PROBHD 5 mmTBI 1H/13  
 PULPROG zg30  
 ID 97938  
 SOLVENT D2O  
 NS 9  
 DS 5  
 SWH 9615.385 Hz  
 FIDRES 0.038178 Hz  
 AQ 5.0928259 sec  
 RG 144  
 DW 52.000 usec  
 DE 6.00 usec  
 TE 298.0 K  
 DT 0.1000000 sec  
 TD0 1

===== CHANNEL f1 =====  
 NUC1 1H  
 P1 8.00 usec  
 PL1 -1.00 dB  
 SFO1 600.1342009 MHz

F2 - Processing parameters  
 SI 65536  
 SF 600.1300151 MHz  
 WDW tu  
 SSB 0  
 LB 0.00 Hz  
 GB 0  
 PC 1.00

1D NMR plot parameters  
 CX 22.80 cm  
 CY 42.42 cm  
 FIP 8.000 ppm  
 F1 4801.04 Hz  
 F2 -1.000 ppm  
 FZ -600.13 Hz  
 PPKCM 0.39474 ppm/cm  
 HZCM 236.89343 Hz/cm

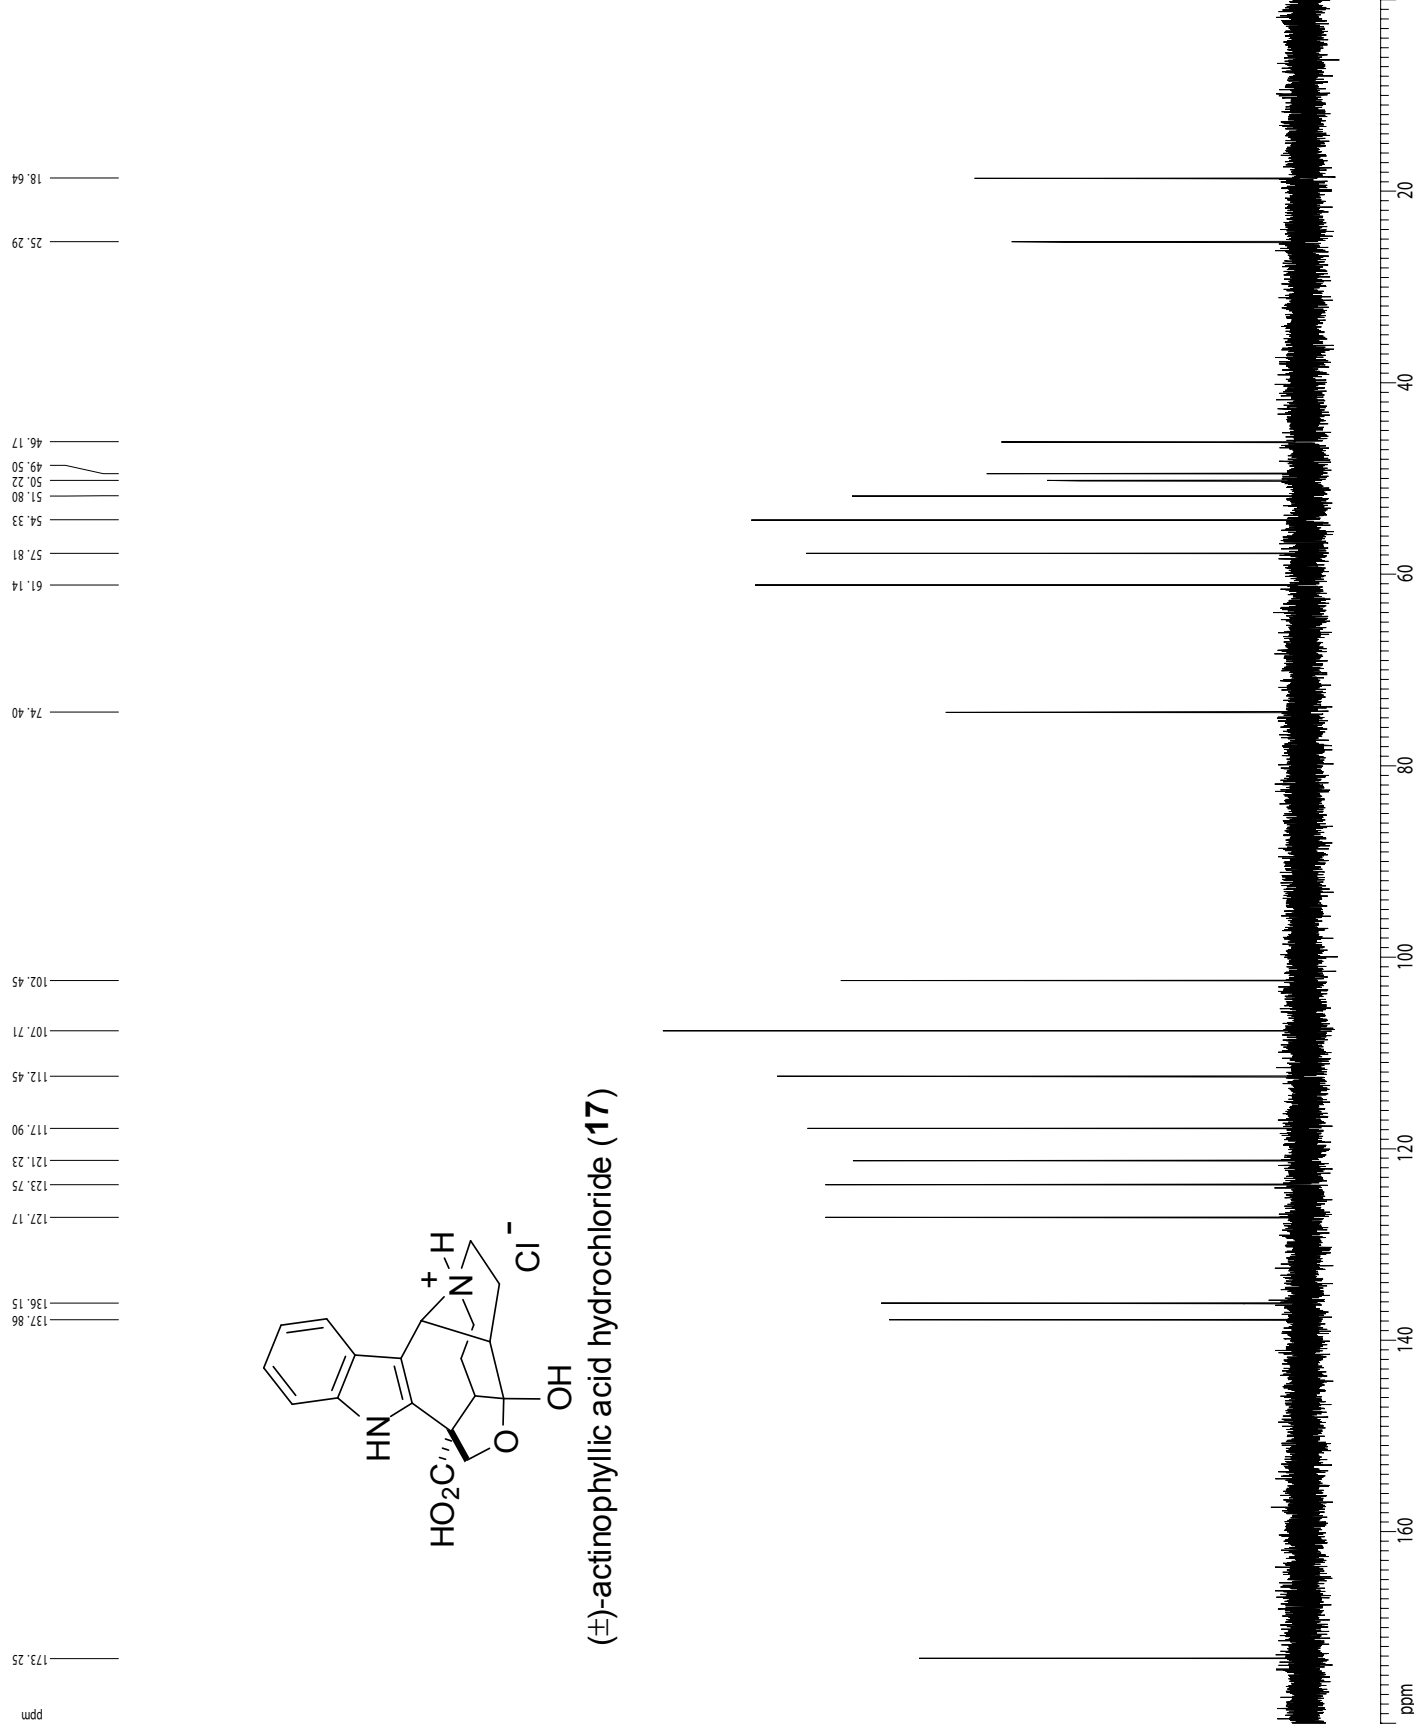

```

Current Data Parameters
USER      connor
NAME      CLM2-22E-D2O
EXPNO     3
PROCNO    1

F2 - Acquisition Parameters
Date_     20080209
Time      11.07
INSTRUM   cryo500
PROBHD    5 mmCPTCL 1H
PULPROG   zgpg30
TD         65418
SOLVENT   D2O
NS         220
DS         4
SWH        30903.031 Hz
FIDRES     0.463222 Hz
AQ          1.0754470 sec
RG          18390.4
DE          16.500 usec
TE          298.0 K
D1          0.2500000 sec
d11         0.0300000 sec
ACQREST    0.0000000 sec
MCURBK     0.0150000 sec

===== CHANNEL f1 =====
NUC1        13C
P1          14.75 usec
PL1         -1.00 dB
SFO1        125.7942548 MHz

===== CHANNEL f2 =====
COPPRG2    waltz16
NUC2         1H
PCPD2       100.00 usec
PL2         1.60 dB
PL12        24.80 dB
SFO2        500.2225011 MHz

F2 - Processing parameters
SI          65536
SF          125.7803448 MHz
WDW         no
SSB         0
LB          0.00 Hz
GB          0
PC          2.00

ID: NMR plot parameters
CV          22.80 cm
CY          9.80 cm
EI          180.000 ppm
F1          22640.46 Hz
F2          0.000 ppm
F3          0.00 Hz
PP4CM       7.89474 ppm/cm
HZCM        993.00275 Hz/cm
    
```

F2 - Acquisition Parameters

Date\_ 20080209  
 Time 11.17  
 INSTRUM cryo500  
 PROBHD 5 mm CPTCI 1H  
 PULPROG invgpgw  
 TD 2048  
 ACQMENT D20  
 DS 16  
 SVH 3004.808 Hz  
 FIDRES 1.467191 Hz  
 AQ 0.3408372 sec  
 RG 18390.4  
 DW 166.400 usec  
 DE 6.50 usec  
 TE 300.2 K  
 CHSTZ  
 d0 145.0000000 sec  
 d1 0.0000000 sec  
 d2 0.00344628 sec  
 d12 0.0002000 sec  
 d13 0.0000300 sec  
 d16 0.0002000 sec  
 d20 0.0042238 sec  
 INU 0.0001729 sec

CHANNEL f1

NUC1 H  
 P1 7.38 usec  
 P2 14.75 usec  
 PL1 1.60 dB  
 SFO1 500.2225011 MHz

CHANNEL f2

CPDPRG2 JRC  
 NUC2 13C  
 P3 14.75 usec  
 PCPD2 65.00 usec  
 PL2 -1.00 dB  
 PL12 11.80 dB  
 SFO2 125.7942548 MHz

GRAB F1 CHANNEL

GPVMB sine.100  
 GPVMB sine.100  
 GPVX1 0.00 %  
 GPVX2 0.00 %  
 GPVX3 0.00 %  
 GPV1 0.00 %  
 GPV2 0.00 %  
 GPV3 0.00 %  
 GPV4 30.00 %  
 GPV5 18.00 %  
 GPV6 24.00 %  
 P16 1000.00 usec

F1 - Acquisition parameters

NUC1 13C  
 SFO1 125.7942 MHz  
 FIDRES 56.489817 Hz  
 SIW 229.920 ppm  
 F1MODE undefined

F2 - Processing parameters

SF 1024  
 SIW 500.2200131 MHz  
 SSB 0  
 LB 5.00 Hz  
 GB 0  
 PC 2.00

F1 - Processing parameters

SF 1024  
 SIW 125.7902048 MHz  
 SSB 3  
 LB 0.00 Hz  
 GB 0

2D MR plot parameters

CXZ 15.00 cm  
 CYZ 15.00 cm  
 F2P10 7.819 ppm  
 F2P11 3911.13 Hz  
 F2PH 2.035 ppm  
 F2H 1017.82 Hz  
 F1P10 129.453 ppm  
 F1LO 16382.64 Hz  
 F1PH 12.908 ppm  
 F1PC 10238.61 Hz  
 F1PCMC 10238.61 ppm/cm  
 F1HZCM 102.3862 Hz/cm  
 F1PPCM 7.76965 ppm/cm  
 F1HZCM 977.26862 Hz/cm

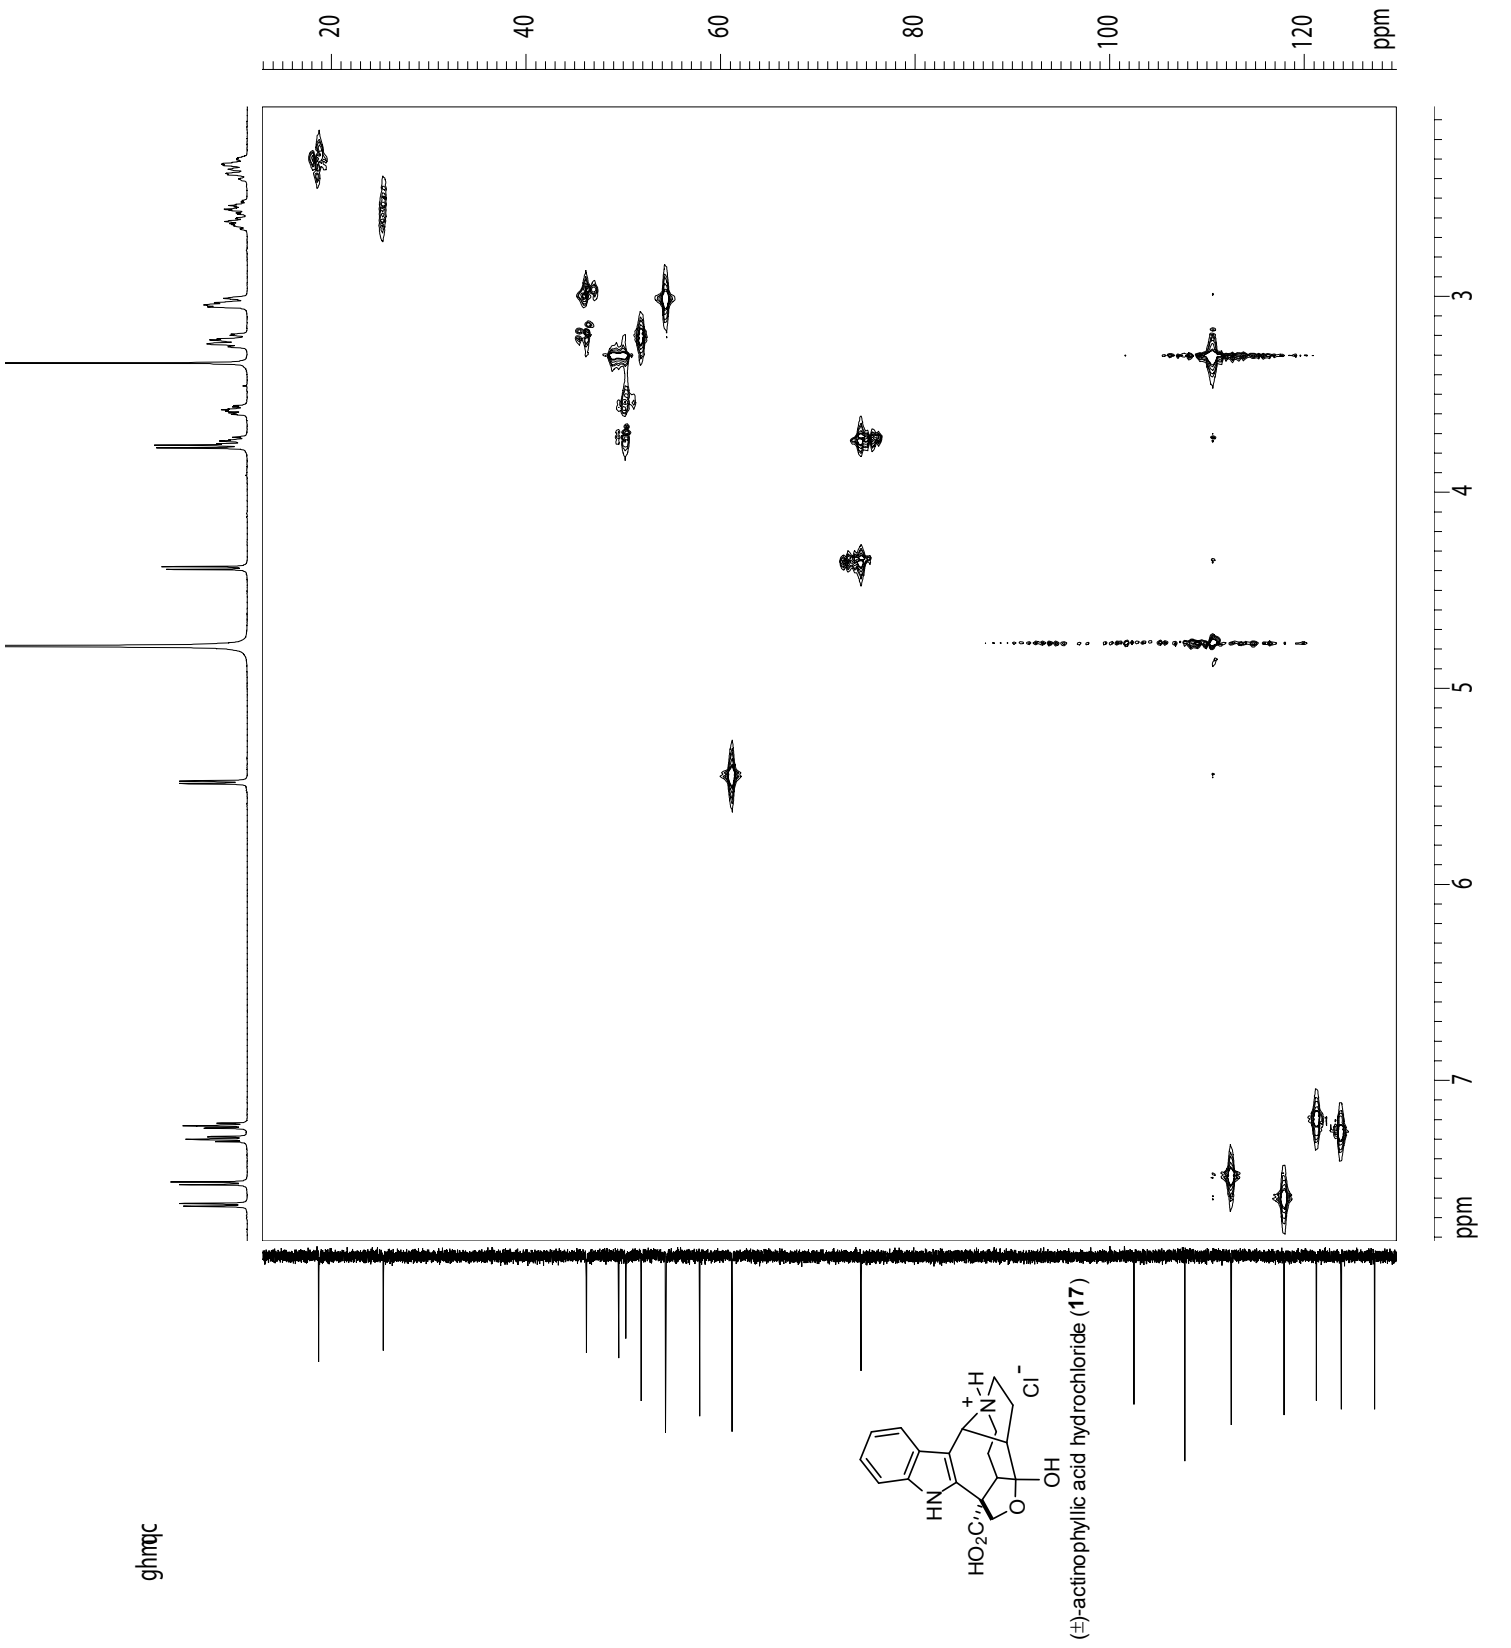

ghmrc

(+)-actinophyllin acid hydrochloride (17)

Current Data Parameters  
 USER Comor  
 NAME CLM 2-ZE-D2O  
 EXPNO 16  
 PROCNO 1

F2 - Acquisition Parameters  
 Date\_ 20080209  
 Time 11.42  
 INSTRUM av600  
 PROBHD 5 mm TBI 1H/13  
 PULPROG cosygaf  
 TD 1912  
 SOLVENT D2O  
 NS 1  
 DS 16  
 SWH 3597.122 Hz  
 FIDRES 1.881340 Hz  
 AQ 0.2658180 sec  
 RG 114  
 DW 139.000 usec  
 DE 6.00 usec  
 TE 298.0 K  
 d0 0.0000300 sec  
 d1 1.48689198 sec  
 d13 0.0000400 sec  
 d16 0.0002000 sec  
 INO 0.0002770 sec

==== CHANNEL f1 =====  
 NUC1 1H  
 P1 8.00 usec  
 PL1 8.00 usec  
 PL2 -1.00 db  
 SFO1 600.1330006 MHz

==== GRADIENT CHANNEL =====  
 GPNAM1 SINE.100  
 GPNAM2 SINE.100  
 GPZ1 10.00 %  
 GPZ2 10.00 %  
 P16 1000.00 usec

F1 - Acquisition parameters  
 ND0 256  
 TD 600.133 MHz  
 SFO1 14.066439 Hz  
 SW 6.000 ppm  
 FMODE CF

F2 - Processing parameters  
 SI 1024  
 SF 600.1300131 MHz  
 SINE  
 VDW 0  
 SSB 0  
 LB 0.00 Hz  
 GB 0  
 PC 1.00

F1 - Processing parameters  
 SI 1024  
 SF 600.1300131 MHz  
 SINE  
 VDW 0  
 SSB 0  
 LB 0.00 Hz  
 GB 0

2D NMR plot parameters  
 CX2 15.00 cm  
 CX1 15.00 cm  
 F2P1O 7.700 ppm  
 F2LO 4620.96 Hz  
 F2PH 2.227 ppm  
 F2H 1336.48 Hz  
 F1P1O 7.732 ppm  
 F1LO 4640.31 Hz  
 F1PH 2.212 ppm  
 F1H 1327.66 Hz  
 F2PPMCM 0.36486 ppm/cm  
 F2HZCM 218.96545 Hz/cm  
 F1PPMCM 0.36799 ppm/cm  
 F1HZCM 220.84308 Hz/cm

gcosy

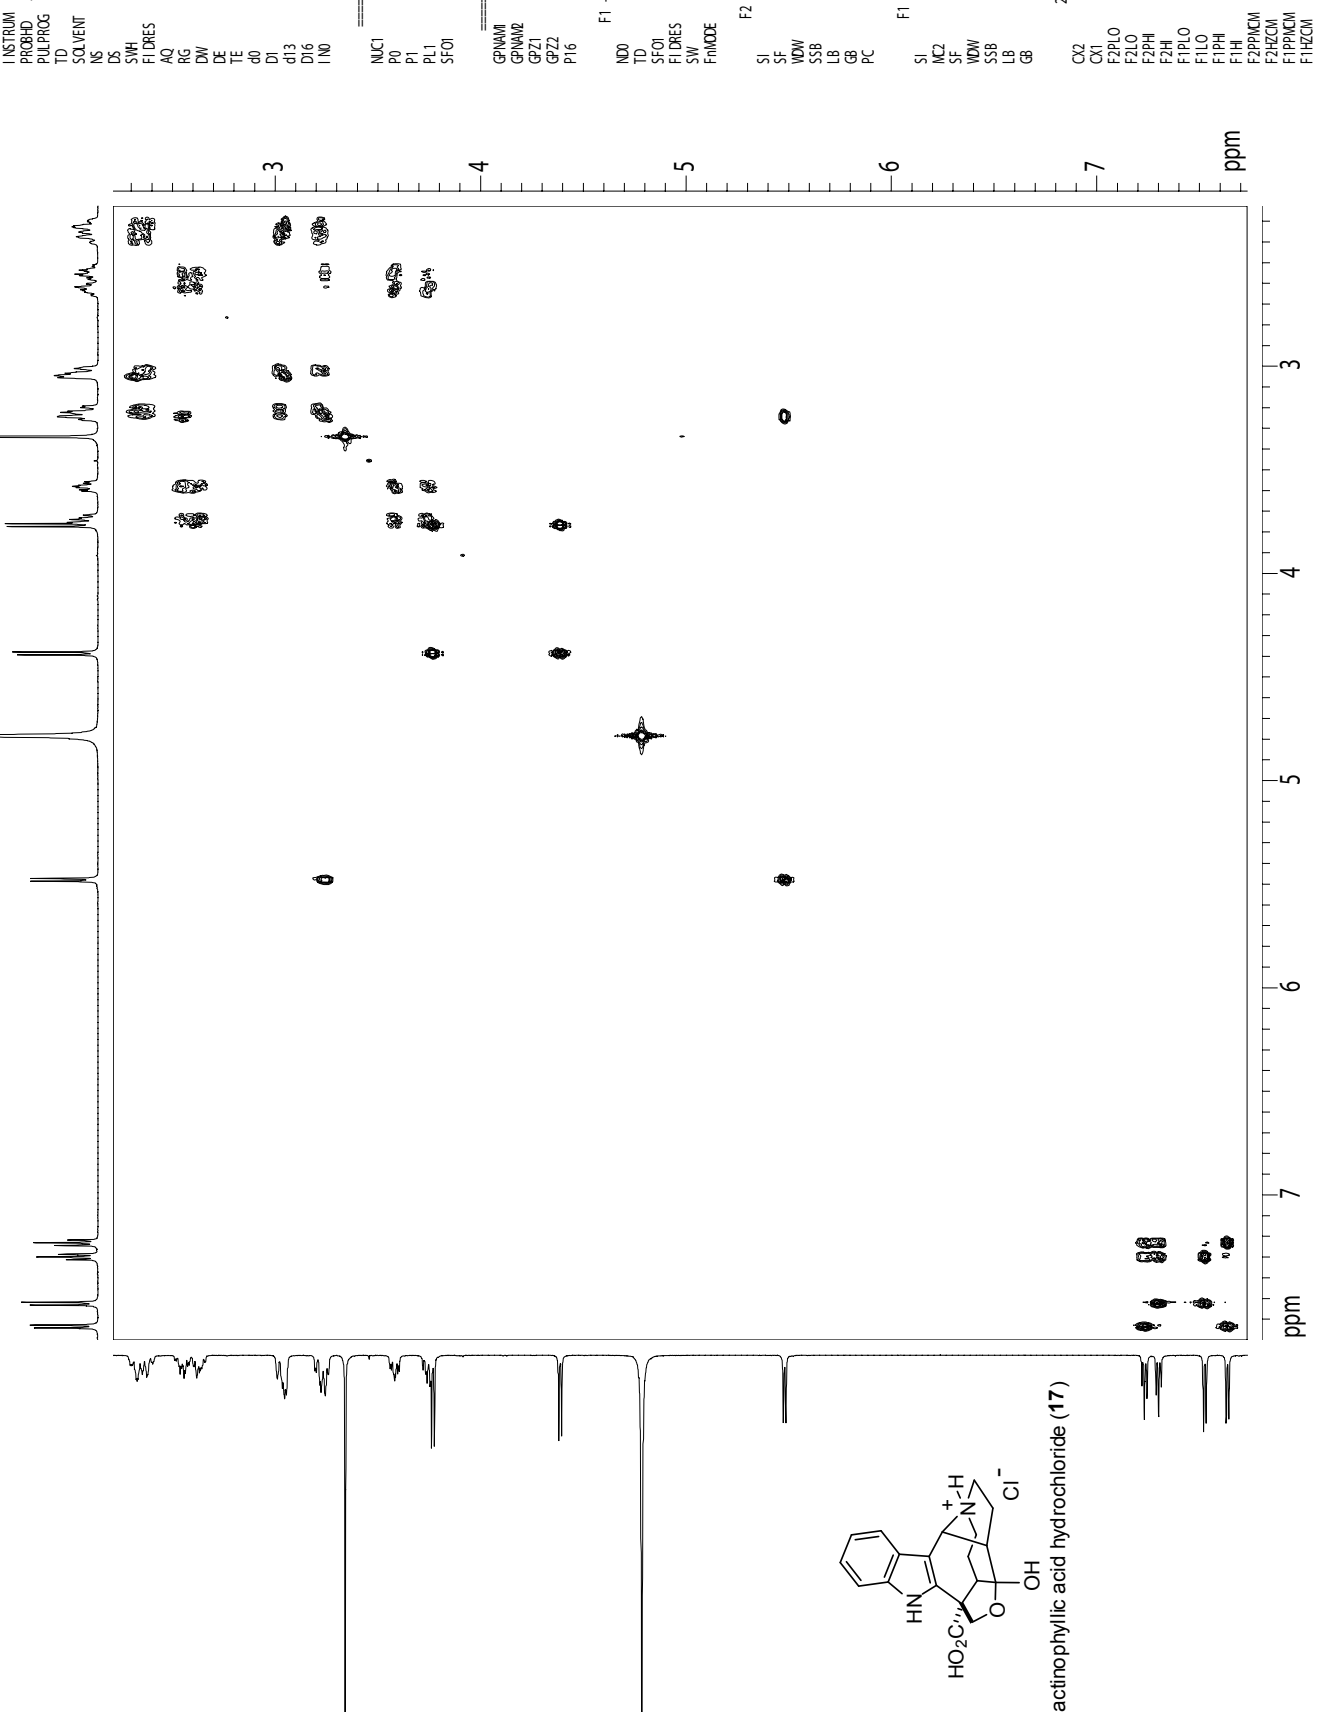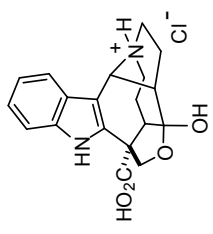



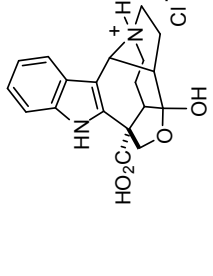

ghnbc optimized for 10Hz couplings

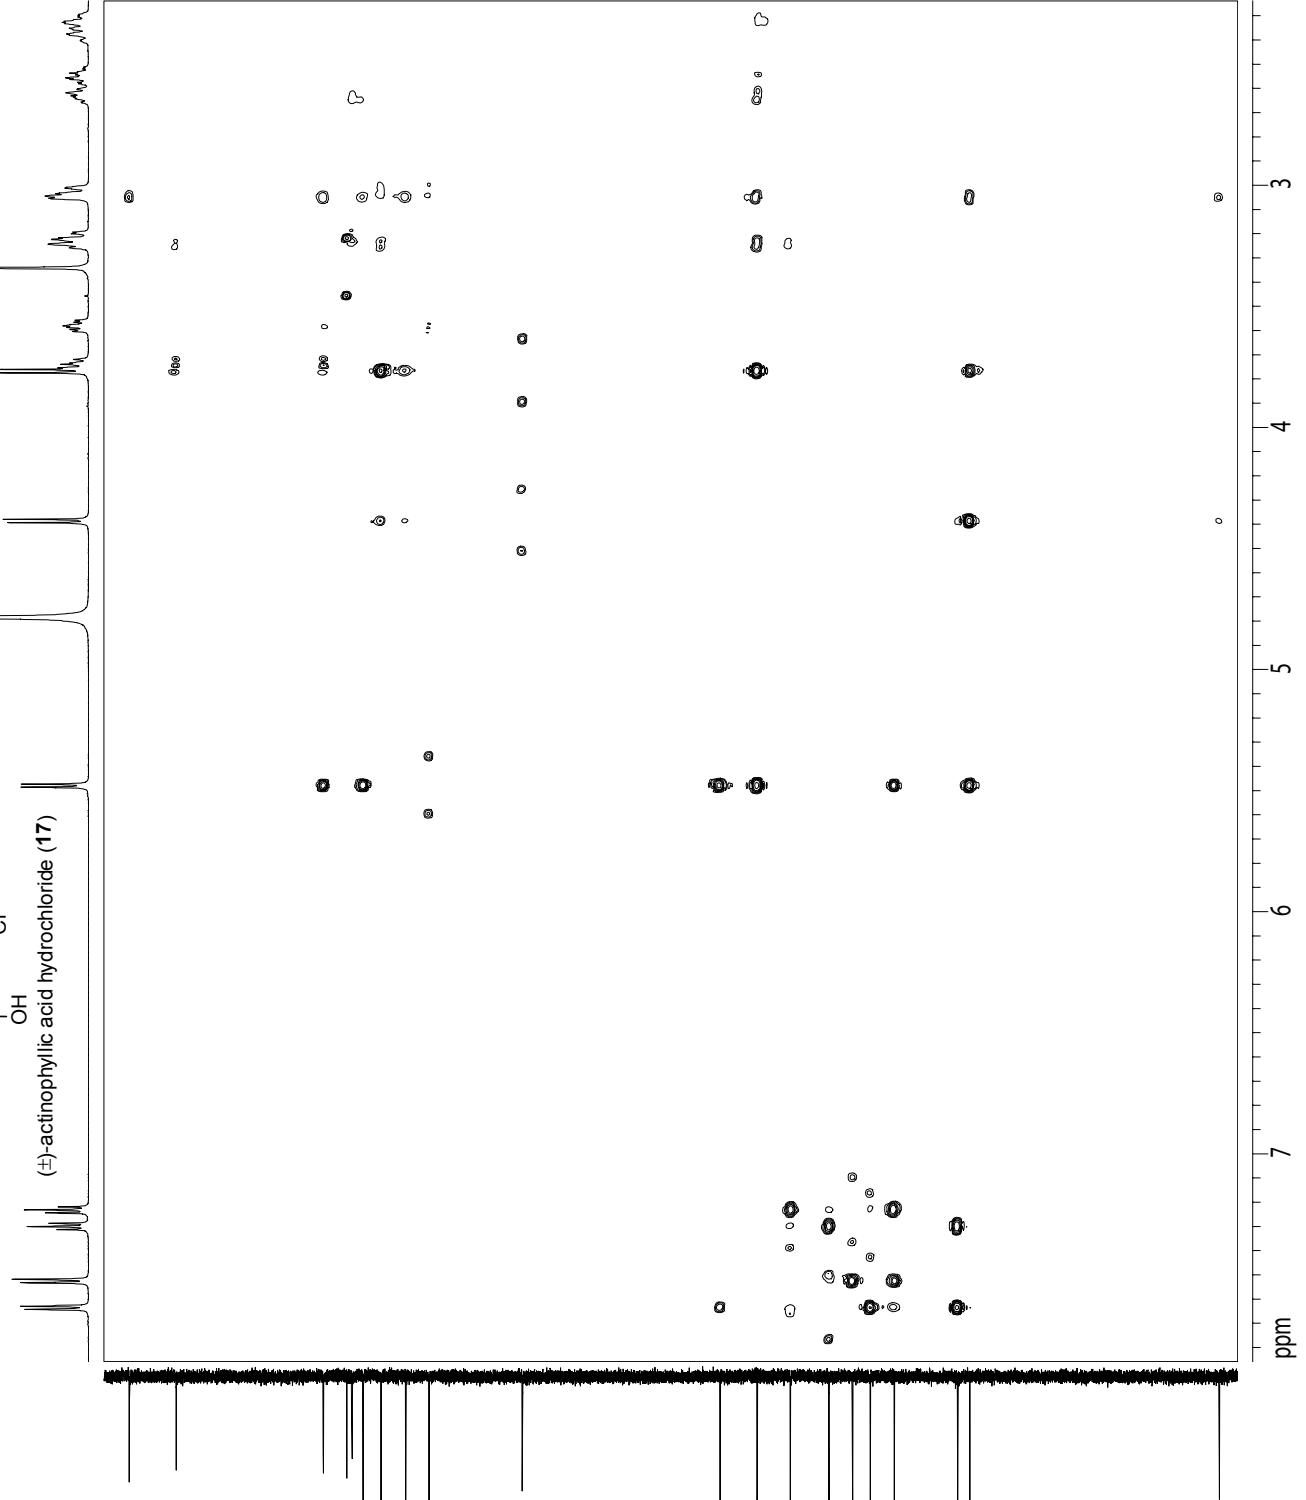

Current Data Parameters  
 USER comor  
 NAME CLM 2-ZE-D2O  
 EXPNO 17  
 PROCNO 1

S57

F2 - Acquisition Parameters

Date\_ 20080209  
 Time 11:53  
 INSTRUM av600  
 PULPROG zgpg30  
 TD 65536  
 SOLVENT DMS  
 NS 2  
 DS 16  
 SWH 3597.122 Hz  
 FIDRES 4.650813 Hz  
 AQ 0.1234620 sec  
 RG 2050  
 DW 139.000 usec  
 DE 6.00 usec  
 TE 298.0 K

25

F1 - Acquisition Parameters

CHN1 1H  
 CHN2 13C  
 NI1 8.00 usec  
 NI2 16.00 usec  
 PL1 -1.00 dB  
 PL2 0.00 dB  
 SF01 600.1330006 MHz  
 SF02 150.9194083 MHz

50

F2 - Processing parameters

SI 1024  
 SF 600.1330131 MHz  
 SFO1 150.9194 MHz  
 SFO2 141.530792 Hz  
 SW 240.074 ppm  
 FWHM 0  
 GB 0  
 PC 1.40

75

F1 - Acquisition parameters

NI1 8.00 usec  
 NI2 16.00 usec  
 PL1 -1.00 dB  
 PL2 0.00 dB  
 SF01 600.1330006 MHz  
 SF02 150.9194083 MHz

100

F2 - Processing parameters

SI 1024  
 SF 600.1330131 MHz  
 SFO1 150.9194 MHz  
 SFO2 141.530792 Hz  
 SW 240.074 ppm  
 FWHM 0  
 GB 0  
 PC 1.40

125

F1 - Acquisition parameters

NI1 8.00 usec  
 NI2 16.00 usec  
 PL1 -1.00 dB  
 PL2 0.00 dB  
 SF01 600.1330006 MHz  
 SF02 150.9194083 MHz

150

F2 - Processing parameters

SI 1024  
 SF 600.1330131 MHz  
 SFO1 150.9194 MHz  
 SFO2 141.530792 Hz  
 SW 240.074 ppm  
 FWHM 0  
 GB 0  
 PC 1.40

ppm

ppm
